# Supplementary material for: 40 Ar/ 39 Ar constraints on the eruption history of the Christiana Volcano of the Christiana-Santorini-Kolumbo volcanic field, Greece
Source: Copernicus journal article supplement (doi:10.5194/egusphere-2025-4857), 2025-10-22
Supplement: Supplementary file 1 [file Supplementary material_ A_ArAr data.xlsx]

## Sheet: Ages
	Age (Ma)	±2σ (Ma)	MSWD	N	Ntotal	39ArK (%)	K/Ca	±2σ	40Ar/36Ar	±2σ (Ma)			Age (Ma)	±2σ (Ma)	MSWD
CH18-02 - Christiana
VU120-O1a	2.52857	0.317094	0.276548	2	12	48.1106	0.64812	0.143193	n/a	n/a			n/a	n/a	n/a
VU120-O1b	2.17153	0.207582	1.64667	8	13	72.2595	0.417011	0.129131	295.452	2.88559	5.51528	1.05056	2.71725	0.517427	1.16011
VU120-O1c	2.2721	0.19862	2.29938	5	12	54.621	0.380291	0.143401	301.803	3.60596	3.49411	1.23251	1.72193	0.607185	1.73325
VU120-O1b, c	2.23229	0.137078	1.80513	13	25	63.4054	0.400753	0.0925535	298.618	2.84651	4.5227	0.968147	2.22853	0.47692	2.21203
CH18-07 - Christiana
VU120-O2a	2.6918	0.0542361	5.81163	5	12	66.4405	0.25867	0.132761	285.145	27.1369	5.84416	0.76398	2.87969	0.376498	6.20968
VU120-O2b	2.66986	0.0321756	1.55737	9	12	82.3767	0.253325	0.106065	287.767	6.79743	5.72013	0.194996	2.8181	0.09728	0.463545
VU120-O2c	2.68579	0.0369394	2.69129	8	12	75.3533	0.270188	0.0892603	294.022	19.9139	5.58653	0.584462	2.75233	0.288144	3.15109
VU120-O2a, b, c	2.68161	0.0251893	2.46111	22	36	74.3724	0.26083	0.0592777	289.126	7.32024	5.71533	0.212757	2.81574	0.105916	2.03408
CH18-12A - Christiana
VU120-O3a	2.61265	0.0347017	1.75482	8	12	93.9706	0.193132	0.0662033	299.468	4.62865	5.28059	0.129718	2.60219	0.0655165	2.04204
VU120-O3b	2.57051	0.0676547	2.55501	9	13	80.6156	0.275322	0.0484158	292.119	7.64619	5.40514	0.251305	2.66303	0.124618	2.09884
VU120-O3c	2.60158	0.0236652	0.92536	8	13	67.6165	0.268151	0.0640245	302.593	5.3987	5.25476	0.0506538	2.58947	0.0288475	0.70777
VU120-O3a, b, c	2.59881	0.0226247	1.52093	24	38	76.9477	0.225924	0.0393635	297.833	2.43255	5.28459	0.0493973	2.60416	0.0283561	1.56737
CH18-14A - Christiana --> age in ka
VU120-O4a	222.287	90.9977	2.57211	9	12	99.722	0.511079	0.0373859	301.877	1.79942	0.191788	0.113912	94.575	56.1737	1.03604
VU120-O4b	139.099	19.3324	0.614587	9	10	99.9141	0.497513	0.0537949	296.63	4.65848	0.30095	0.05765	148.403	28.439	0.597469
VU120-O4c	123.72	18.112	0.881961	9	10	99.808	0.503017	0.0578785	304.772	5.3677	0.220209	0.045537	108.589	22.4628	0.221657
VU120-O4a, b, c	133.354	13.5469	1.09733	25	32	87.3399	0.503217	0.0309156	301.008	1.68293	0.248671	0.0295449	122.624	14.5848	0.789218
CH18-15 - Christiana
VU120-O5a	2.48353	0.133313	0.873761	7	10	98.7383	0.254814	0.170895	300.218	2.23142	4.50415	0.751896	2.2198	0.370544	0.713623
VU120-O5b	2.18846	0.134684	1.30744	17	18	99.2528	0.148854	0.0650916	299.78	1.5377	4.01634	0.575707	1.97916	0.283758	1.26366
VU120-O5c	2.50137	0.100878	1.81709	14	18	92.1695	0.344382	0.120591	298.375	1.71598	5.12639	0.564922	2.52578	0.278506	2.2373
VU120-O5a, b, c	2.42373	0.0792875	1.89841	37	46	95.7286	0.180347	0.0548464	298.733	1.22865	4.86834	0.411463	2.39873	0.203047	2.11508
CH18-16 - Christiana
VU120-O6a	2.61168	0.0303142	0.759927	5	11	74.7522	0.426969	0.15926	299.702	5.20724	5.19198	0.222367	2.58818	0.111354	0.996964
VU120-O6b	2.54346	0.0288794	1.81957	10	17	66.9879	0.365335	0.119341	293.602	3.56082	5.25904	0.11967	2.62159	0.0607158	1.09167
VU120-O6a, b	2.57229	0.0248827	1.80427	13	28	64.8961	0.487847	0.0976938	302.223	4.72045	5.03662	0.16474	2.51079	0.0828069	1.67674
CH18-04 - Christiana
VU120-O7a	2.63336	0.0249061	1.65656	9	12	98.3243	0.417129	0.0766422	297.958	3.49065	5.35063	0.0569292	2.63668	0.0316792	1.8803
VU120-O7b	2.62744	0.0225094	1.28919	7	11	81.6816	0.478826	0.097382	282.171	12.3347	5.40808	0.0646119	2.66497	0.0351376	0.234316
VU120-O7a, b	2.63029	0.0195626	1.41917	16	23	89.8211	0.43913	0.0600104	297.712	2.8875	5.34432	0.0344422	2.63357	0.0224686	1.49436
CH19-05B - Christiana
VU120-O8a	2.66025	0.0480396	1.34048	8	12	85.8005	0.366144	0.0321066	285.128	13.2677	5.53177	0.206709	2.75744	0.103672	0.939622
VU120-O8b	2.70192	0.0387412	1.37797	8	10	89.8599	0.386567	0.0385343	286.917	16.4494	5.56248	0.210091	2.77273	0.105353	1.22243
VU120-O8a, b	2.68614	0.032036	1.44627	16	22	87.97	0.376089	0.0247392	284.756	9.65344	5.56876	0.134441	2.77586	0.0680669	1.01075
CH18-08 - Christiana
VU120-O9a	2.74784	0.0402384	0.903771	8	12	94.0262	0.242928	0.0873186	296.989	4.23155	5.58808	0.218106	2.78548	0.109324	1.00231
VU120-O9b	2.74471	0.0648664	4.59009	5	10	59.3593	0.195172	0.0974693	295.927	9.60043	5.58935	0.332295	2.78612	0.165966	5.6973
VU120-O9a, b	2.74588	0.035831	2.05862	13	22	72.6952	0.217903	0.0629767	296.951	3.81719	5.58935	0.332295	2.77623	0.0804084	2.16654
CH18-10 - Christiana
VU120-O10a	2.65551	0.0239093	4.0324	5	12	76.661	0.439692	0.0417887	288.532	13.7419	5.39922	0.105367	2.69141	0.0538026	3.24332
VU120-O10b	2.6544	0.0285542	0.598906	8	12	71.9017	0.458236	0.0249035	287.693	13.6015	5.39795	0.104661	2.69078	0.0534586	0.293082
VU120-O10a, b	2.65535	0.0171495	1.69401	13	24	74.4333	0.449054	0.02235	288.383	6.81242	5.39936	0.0522624	2.69148	0.0285962	1.05128

## Sheet: VU120-O1
Relative Abundances			36Ar [A]	%1s	37Ar [A]	%1s	38Ar [A]	%1s	39Ar [A]	%1s	40Ar [A]	%1s	40(r)/39(k)	± 2s	Age	± 2s	40Ar(r)	39Ar(k)	K/Ca	± 2s		Relative Abundances			36Ar [A]	%1s	37Ar [A]	%1s	38Ar [A]	%1s	39Ar [A]	%1s	40Ar [A]	%1s	40(r)/39(k)	± 2s	Age	± 2s	40Ar(r)	39Ar(k)	K/Ca	± 2s		Relative Abundances			36Ar [A]	%1s	37Ar [A]
															(Ma)		(%)	(%)																			(Ma)		(%)	(%)
135_VU120-O1A	5		0.00870228	4.0462	0.00201764	433.951	0.00167745	17.8426	0.000195825	624.605	2.75337	2.74335	798.996	10138.8	356.79	4113.51	5.64321	0.000259414	0.041445	0.633401		097_VU120-O1B	10		1.34868	0.439624	0.227379	6.94109	0.265381	0.406652	0.645954	0.227047	404.818	0.123787	3.36476	5.84335	1.65822	2.87841	0.536777	0.678111	1.22128	0.169631		008_VU120-O1C	10		1.20948	0.229612	0.121274
136_VU120-O1A	7.5		0.511144	0.350541	0.0193489	52.5807	0.0947134	0.417379	0.0287006	4.40397	153.596	0.0589874	34.5258	39.5285	16.944	19.3096	0.644848	0.0382685	0.637537	0.672792		098_VU120-O1B	15		1.07198	0.465558	3.1188	0.838649	0.262068	0.313043	4.22565	0.120856	333.995	0.148764	3.35881	0.76031	1.65529	0.374527	4.2474	4.43486	0.582317	0.00986818		009_VU120-O1C	15		1.39179	0.293438	2.15908
138_VU120-O1A	10		1.62969	0.337657	0.379093	2.86528	0.322053	0.252182	0.967249	0.208008	489.012	0.0343996	2.56481	3.57248	1.26413	1.76017	0.507177	1.28995	1.09685	0.0630209		100_VU120-O1B	21		0.383805	0.632973	10.1888	0.675873	0.173952	0.450635	8.37295	0.111847	161.768	0.302015	5.73452	0.211365	2.82518	0.104051	29.6569	8.78466	0.353076	0.00483771		011_VU120-O1C	21		0.474418	0.396053	8.40344
139_VU120-O1A	15		0.821175	0.395308	4.2694	0.728183	0.222109	0.33592	4.66256	0.105471	267.467	0.0436783	4.85659	0.433137	2.39294	0.213276	8.46093	6.21591	0.469308	0.00690626		101_VU120-O1B	30		0.859586	0.45982	16.839	0.650899	0.268567	0.44828	8.79206	0.104277	302.959	0.16376	5.42566	0.29801	2.67313	0.146717	15.7253	9.22004	0.224224	0.00295626		012_VU120-O1C	30		0.582533	0.358703	19.1546
141_VU120-O1A	18		0.246059	0.506477	5.04673	0.709981	0.0932109	0.903418	4.11864	0.131275	96.7052	0.24298	5.74357	0.217565	2.82964	0.107103	24.4415	5.48964	0.350635	0.00506341		103_VU120-O1B	10	4	1.2514	0.403892	9.8482	0.65737	0.310616	0.329272	5.99588	0.100721	402.333	0.0940814	4.92303	0.53551	2.42565	0.26368	7.32857	6.2889	0.261508	0.00347836		014_VU120-O1C	10.5	4	2.39369	0.28378	16.4377
142_VU120-O1A	21		0.298578	0.42199	5.02505	0.662953	0.0984031	0.565594	3.52466	0.119713	109.265	0.215246	5.82579	0.257762	2.87011	0.126889	18.7748	4.6973	0.30132	0.00405996		104_VU120-O1B	11	4	3.19324	0.42074	9.57807	0.680908	0.699415	0.328323	8.50155	0.120281	984.37	0.0478139	3.7367	0.979075	1.84143	0.48224	3.22477	8.92012	0.381381	0.00527425		015_VU120-O1C	11.5	4	3.93498	0.234284	10.7406
144_VU120-O1A	25		0.452489	0.38731	5.65608	0.66848	0.121327	0.645541	3.23974	0.122654	153.683	0.154974	5.8811	0.366	2.89734	0.180168	12.3832	4.31666	0.24601	0.00334409		106_VU120-O1B	12	4	4.8018	0.388609	8.94197	0.702603	1.03179	0.261763	10.7376	0.107022	1482.42	0.0394426	4.61177	1.08034	2.27239	0.531995	3.33855	11.2685	0.516057	0.0073354		017_VU120-O1C	12.5	4	4.90029	0.235685	9.0102
145_VU120-O1A	30		0.922278	0.347159	7.39623	0.639413	0.217042	0.323821	3.6797	0.137187	295.072	0.0852054	5.5232	0.560206	2.72115	0.275795	6.87841	4.902	0.21364	0.00279443		107_VU120-O1B	13	4	4.86652	0.392138	7.21471	0.681503	1.05114	0.249578	10.3935	0.107659	1498.89	0.0395063	4.47603	1.14052	2.20554	0.56165	3.1023	10.9084	0.619169	0.00854407		018_VU120-O1C	13.5	4	5.56719	0.341694	8.51589
147_VU120-O1A	10		1.94297	0.306992	8.28021	0.638963	0.441756	0.340745	6.07377	0.100318	605.735	0.0491166	4.33218	0.627411	2.1347	0.30898	4.33994	8.09484	0.315128	0.00407653		109_VU120-O1B	14	4	5.28871	0.384319	7.19087	0.665644	1.13192	0.231304	11.4135	0.104051	1626.15	0.038354	4.18207	1.1075	2.06078	0.545432	2.93403	11.9795	0.682216	0.00919265		020_VU120-O1C	14.5	4	3.50328	0.216378	5.27324
148_VU120-O1A	12		5.78507	0.289705	12.2498	0.592113	1.23585	0.234349	12.6356	0.0790267	1771.94	0.0331392	3.61941	0.847136	1.78365	0.417267	2.57929	16.8445	0.44325	0.00529569		110_VU120-O1B	15	4	3.21586	0.390207	4.19457	0.781202	0.696188	0.324795	6.97796	0.125362	991.885	0.0478459	4.59946	1.12007	2.26633	0.551561	3.23443	7.32411	0.715045	0.0113149		021_VU120-O1C	16		2.19412	0.263766	3.1175
150_VU120-O1A	15	4	8.96774	0.283766	13.0328	0.6186	1.89612	0.181482	17.9988	0.0811662	2765.71	0.0314508	4.96477	0.904762	2.44621	0.445491	3.22941	23.9982	0.593557	0.00740648		112_VU120-O1B	17	4	3.78755	0.37839	5.09469	0.805402	0.81115	0.251574	8.42935	0.110841	1163.42	0.0450833	3.9167	1.06065	1.93008	0.522396	2.83662	8.84748	0.71116	0.0115635		023_VU120-O1C	18		3.03779	0.256446	4.21006
151_VU120-O1A	21	4	8.85218	0.293187	10.4741	0.649882	1.89	0.211879	18.0826	0.0802888	2737.95	0.0327033	5.30314	0.915093	2.61281	0.450537	3.50105	24.1124	0.742066	0.0097185		113_VU120-O1B	19	4	3.04864	0.422963	4.15622	0.85977	0.649056	0.27997	6.40506	0.116291	929.489	0.0523581	3.06293	1.24776	1.50953	0.614689	2.10973	6.72258	0.662374	0.0114936		024_VU120-O1C	21		3.82511	0.227965	5.60915
																						115_VU120-O1B	21		2.16744	0.388053	2.90684	0.898005	0.463496	0.259571	4.40449	0.109054	669.469	0.0632287	5.12979	1.1966	2.52746	0.589162	3.37343	4.6228	0.651253	0.0117826
		S	30.4381	0.135388	71.8309	0.226703	6.63426	0.0978249	75.0122	0.0347806	9448.89	0.0159734																																		S	33.0147	0.090177	92.7527
																								S	35.2852	0.127155	89.5002	0.222076	7.81474	0.0861063	95.2955	0.0328787	10952	0.0167008
Information on Analysis and Constants Used in Calculations									Results		40(a)/36(a)	± 2s	40(r)/39(k)	± 2s	Age	± 2s	MSWD	39Ar(k)	K/Ca	± 2s																								Information on Analysis and Constants Used in Calculations
															(Ma)			(%,n)				Information on Analysis and Constants Used in Calculations									Results		40(a)/36(a)	± 2s	40(r)/39(k)	± 2s	Age	± 2s	MSWD	39Ar(k)	K/Ca	± 2s
																																					(Ma)			(%,n)
Sample = 135_VU120-O1A				Age Equations = Min et al. (2000)					Age Plateau Overestimated Error				5.13203	0.643385	2.52857	0.317094	0.276548	48.1106	0.64812	0.143193																								Sample = 008_VU120-O1C				Age Equations = Min et al. (2000)
Material = groundmass				Negative Intensities = Allowed										0.125366		0.125405	0.598972	2				Sample = 097_VU120-O1B				Age Equations = Min et al. (2000)					Age Plateau				4.40696	0.420799	2.17153	0.207582	1.64667	72.2595	0.417011	0.129131		Material = groundmass				Negative Intensities = Allowed
Location = CH18-02 - Christiana				Decay Constant 40K = 5.460 ± 0.053 E-10 1/a					Full External Error							0.321482	3.82843	2σ Confidence Limit				Material = groundmass				Negative Intensities = Allowed										0.0954851		0.0955925	0.117239	8				Location = CH18-02 - Christiana				Decay Constant 40K = 5.460 ± 0.053 E-10 1/a
Analyst = Klaudia Kuiper				Decay Constant 39Ar = 2.940 ± 0.016 E-07 1/h					Analytical Error							0.316778	1	Error Magnification				Location = CH18-02 - Christiana				Decay Constant 40K = 5.460 ± 0.053 E-10 1/a					Full External Error							0.212502	2.06904	2σ Confidence Limit				Analyst = Klaudia Kuiper				Decay Constant 39Ar = 2.940 ± 0.016 E-07 1/h
Project = VU120				Decay Constant 37Ar = 8.230 ± 0.012 E-04 1/h																		Analyst = Klaudia Kuiper				Decay Constant 39Ar = 2.940 ± 0.016 E-07 1/h					Analytical Error							0.207226	1.28322	Error Magnification				Project = VU120				Decay Constant 37Ar = 8.230 ± 0.012 E-04 1/h
Mass Discrimination Law = LIN				Decay Constant 36Cl = 2.257 ± 0.015 E-06 1/a					Total Fusion Age				4.89435	0.350932	2.41153	0.173323		12	0.448755	0.00205852		Project = VU120				Decay Constant 37Ar = 8.230 ± 0.012 E-04 1/h																		Mass Discrimination Law = LIN				Decay Constant 36Cl = 2.257 ± 0.015 E-06 1/a
Irradiation = VU120				Decay Activity 40K(EC,β⁺) = 3.310 ± 0.030 1/gs										0.0717014		0.0718724						Mass Discrimination Law = LIN				Decay Constant 36Cl = 2.257 ± 0.015 E-06 1/a					Total Fusion Age				4.45408	0.29343	2.19473	0.145021		13	0.457554	0.00205441		Irradiation = VU120				Decay Activity 40K(EC,β⁺) = 3.310 ± 0.030 1/gs
J = 0.00026920 ± 0.00000075				Decay Activity 40K(β⁻) = 27.890 ± 0.150 1/gs					Full External Error							0.180525						Irradiation = VU120				Decay Activity 40K(EC,β⁺) = 3.310 ± 0.030 1/gs										0.0658789		0.0660768						J = 0.00026920 ± 0.00000075				Decay Activity 40K(β⁻) = 27.890 ± 0.150 1/gs
FCs = 28.201 ± 0.023 Ma				Atmospheric Ratio 40/36(a) = 298.56 ± 0.31					Analytical Error							0.172797						J = 0.00026920 ± 0.00000075				Decay Activity 40K(β⁻) = 27.890 ± 0.150 1/gs					Full External Error							0.152126						FCs = 28.201 ± 0.023 Ma				Atmospheric Ratio 40/36(a) = 298.56 ± 0.31
IGSN = Undefined				Atmospheric Ratio 38/36(a) = 0.1885 ± 0.0003																		FCs = 28.201 ± 0.023 Ma				Atmospheric Ratio 40/36(a) = 298.56 ± 0.31					Analytical Error							0.1445						IGSN = Undefined				Atmospheric Ratio 38/36(a) = 0.1885 ± 0.0003
Preferred Age = Undefined				Production Ratio 39/37(ca) = 0.000673 ± 0.000004					Normal Isochron Cannot Calculate													IGSN = Undefined				Atmospheric Ratio 38/36(a) = 0.1885 ± 0.0003																		Preferred Age = Undefined				Production Ratio 39/37(ca) = 0.000673 ± 0.000004
Classification = Undefined				Production Ratio 36/37(ca) = 0.000264 ± 0.000002																		Preferred Age = Undefined				Production Ratio 39/37(ca) = 0.000673 ± 0.000004					Normal Isochron		295.428	2.89501	5.51953	1.08699	2.71934	0.535353	1.16641	72.2595				Classification = Undefined				Production Ratio 36/37(ca) = 0.000264 ± 0.000002
Experiment Type = Undefined				Production Ratio 40/39(k) = 0.000860 ± 0.000070																		Classification = Undefined				Production Ratio 36/37(ca) = 0.000264 ± 0.000002								0.00979937		0.196935		0.196869	0.320989	8				Experiment Type = Undefined				Production Ratio 40/39(k) = 0.000860 ± 0.000070
Extraction Method = Undefined				Production Ratio 38/39(k) = 0.012110 ± 0.000030																		Experiment Type = Undefined				Production Ratio 40/39(k) = 0.000860 ± 0.000070					Full External Error							0.538371	2.1547	2σ Confidence Limit				Extraction Method = Undefined				Production Ratio 38/39(k) = 0.012110 ± 0.000030
Heating = 180 sec				Production Ratio 36/38(cl) = 262.80 ± 1.71																		Extraction Method = Undefined				Production Ratio 38/39(k) = 0.012110 ± 0.000030					Analytical Error							0.535137	1.08001	Error Magnification				Heating = 180 sec				Production Ratio 36/38(cl) = 262.80 ± 1.71
Isolation = 5.00 min				Scaling Ratio K/Ca = 0.430																		Heating = 180 sec				Production Ratio 36/38(cl) = 262.80 ± 1.71												4		Number of Iterations				Isolation = 5.00 min				Scaling Ratio K/Ca = 0.430
Instrument = HELIX				Abundance Ratio 40K/K = 1.1700 ± 0.0100 E-04																		Isolation = 5.00 min				Scaling Ratio K/Ca = 0.430												1.91026e-05		Convergence				Instrument = HELIX				Abundance Ratio 40K/K = 1.1700 ± 0.0100 E-04
Lithology = Undefined				Atomic Weight K = 39.0983 ± 0.0001 g					Inverse Isochron Cannot Calculate													Instrument = HELIX				Abundance Ratio 40K/K = 1.1700 ± 0.0100 E-04																		Lithology = Undefined				Atomic Weight K = 39.0983 ± 0.0001 g
Lat-Lon = Undefined - Undefined																						Lithology = Undefined				Atomic Weight K = 39.0983 ± 0.0001 g					Inverse Isochron Clustered Points		295.452	2.88559	5.51528	1.05056	2.71725	0.517427	1.16011	72.2595				Lat-Lon = Undefined - Undefined
Feature = Undefined																						Lat-Lon = Undefined - Undefined												0.0097667		0.190482		0.190423	0.324501	8				Feature = Undefined
																						Feature = Undefined									Full External Error							0.520544	2.1547	2σ Confidence Limit
																															Analytical Error							0.517204	1.07708	Error Magnification
																																						3		Number of Iterations
																																						7.10864e-05		Convergence
																																						0.0441169		Spreading Factor
Relative Abundances			36Ar [A]	%1s	37Ar [A]	%1s	38Ar [A]	%1s	39Ar [A]	%1s	40Ar [A]	%1s	40(r)/39(k)	± 2s	Age	± 2s	40Ar(r)	39Ar(k)	K/Ca	± 2s
															(Ma)		(%)	(%)
008_VU120-O1C	10		1.20948	0.229612	0.121274	18.2542	0.231762	0.379579	0.370836	0.80232	362.675	0.0525169	4.26837	5.01689	2.10328	2.4707	0.436345	0.193883	1.31458	0.480396
009_VU120-O1C	15		1.39179	0.293438	2.15908	1.33809	0.312935	0.310142	3.30967	0.1241	424.366	0.0498185	2.72084	0.792454	1.341	0.390428	2.12108	1.73	0.65886	0.017708
011_VU120-O1C	21		0.474418	0.396053	8.40344	0.74312	0.189634	0.317229	7.58112	0.0852123	182.601	0.0910889	5.49344	0.159537	2.7065	0.0785425	22.7903	3.96153	0.387633	0.00579897
012_VU120-O1C	30		0.582533	0.358703	19.1546	0.666677	0.246351	0.286062	11.1168	0.0790354	236.225	0.0728182	5.74611	0.121319	2.83089	0.0597232	27.01	5.80672	0.249272	0.003347
014_VU120-O1C	10.5	4	2.39369	0.28378	16.4377	0.648367	0.573712	0.247537	10.1835	0.0846233	756.864	0.0385919	4.27537	0.428515	2.10673	0.211033	5.74618	5.31957	0.266104	0.00348
015_VU120-O1C	11.5	4	3.93498	0.234284	10.7406	0.736877	0.868336	0.168461	10.5185	0.075861	1222.03	0.0342764	4.56992	0.578484	2.25178	0.284866	3.93082	5.49679	0.420818	0.00623466
017_VU120-O1C	12.5	4	4.90029	0.235685	9.0102	0.711188	1.05646	0.219849	11.1901	0.0778752	1516.32	0.0342488	4.8275	0.68034	2.37862	0.335001	3.56067	5.84862	0.533745	0.0076373
018_VU120-O1C	13.5	4	5.56719	0.341694	8.51589	0.685478	1.1906	0.239619	12.5075	0.109075	1714.38	0.0584538	4.23165	0.96318	2.0852	0.474348	3.08585	6.53771	0.631264	0.00876333
020_VU120-O1C	14.5	4	3.50328	0.216378	5.27324	0.798925	0.762742	0.190064	8.065	0.07852	1088.76	0.0347611	5.36294	0.630019	2.64225	0.310178	3.97084	4.21567	0.657362	0.0105543
021_VU120-O1C	16		2.19412	0.263766	3.1175	0.838483	0.486796	0.225022	5.1273	0.114146	691.918	0.0386231	7.23593	0.732396	3.56415	0.3604	5.35983	2.68019	0.706924	0.0119643
023_VU120-O1C	18		3.03779	0.256446	4.21006	1.03857	0.656782	0.204157	7.05082	0.103215	941.242	0.0369085	4.90977	0.719047	2.41913	0.354052	3.67642	3.68569	0.719855	0.0150261
024_VU120-O1C	21		3.82511	0.227965	5.60915	0.88824	0.830598	0.186298	9.03179	0.0789985	1170.91	0.0386482	3.24704	0.641783	1.60023	0.31615	2.50356	4.72113	0.692092	0.0123434
097_VU120-O1B	10		1.34868	0.439624	0.227379	6.94109	0.265381	0.406652	0.645954	0.227047	404.818	0.123787	3.36476	5.84335	1.65822	2.87841	0.536777	0.337716	1.22128	0.169631
098_VU120-O1B	15		1.07198	0.465558	3.1188	0.838649	0.262068	0.313043	4.22565	0.120856	333.995	0.148764	3.35881	0.76031	1.65529	0.374527	4.2474	2.20867	0.582317	0.00986818
100_VU120-O1B	21		0.383805	0.632973	10.1888	0.675873	0.173952	0.450635	8.37295	0.111847	161.768	0.302015	5.73452	0.211365	2.82518	0.104051	29.6569	4.37498	0.353076	0.00483771
101_VU120-O1B	30		0.859586	0.45982	16.839	0.650899	0.268567	0.44828	8.79206	0.104277	302.959	0.16376	5.42566	0.29801	2.67313	0.146717	15.7253	4.59181	0.224224	0.00295626
103_VU120-O1B	10	4	1.2514	0.403892	9.8482	0.65737	0.310616	0.329272	5.99588	0.100721	402.333	0.0940814	4.92303	0.53551	2.42565	0.26368	7.32857	3.13203	0.261508	0.00347836
104_VU120-O1B	11	4	3.19324	0.42074	9.57807	0.680908	0.699415	0.328323	8.50155	0.120281	984.37	0.0478139	3.7367	0.979075	1.84143	0.48224	3.22477	4.44245	0.381381	0.00527425
106_VU120-O1B	12	4	4.8018	0.388609	8.94197	0.702603	1.03179	0.261763	10.7376	0.107022	1482.42	0.0394426	4.61177	1.08034	2.27239	0.531995	3.33855	5.61197	0.516057	0.0073354
107_VU120-O1B	13	4	4.86652	0.392138	7.21471	0.681503	1.05114	0.249578	10.3935	0.107659	1498.89	0.0395063	4.47603	1.14052	2.20554	0.56165	3.1023	5.43266	0.619169	0.00854407
109_VU120-O1B	14	4	5.28871	0.384319	7.19087	0.665644	1.13192	0.231304	11.4135	0.104051	1626.15	0.038354	4.18207	1.1075	2.06078	0.545432	2.93403	5.96607	0.682216	0.00919265
110_VU120-O1B	15	4	3.21586	0.390207	4.19457	0.781202	0.696188	0.324795	6.97796	0.125362	991.885	0.0478459	4.59946	1.12007	2.26633	0.551561	3.23443	3.64759	0.715045	0.0113149
112_VU120-O1B	17	4	3.78755	0.37839	5.09469	0.805402	0.81115	0.251574	8.42935	0.110841	1163.42	0.0450833	3.9167	1.06065	1.93008	0.522396	2.83662	4.40627	0.71116	0.0115635
113_VU120-O1B	19	4	3.04864	0.422963	4.15622	0.85977	0.649056	0.27997	6.40506	0.116291	929.489	0.0523581	3.06293	1.24776	1.50953	0.614689	2.10973	3.34801	0.662374	0.0114936
115_VU120-O1B	21		2.16744	0.388053	2.90684	0.898005	0.463496	0.259571	4.40449	0.109054	669.469	0.0632287	5.12979	1.1966	2.52746	0.589162	3.37343	2.30227	0.651253	0.0117826
		S	68.2999	0.0788374	182.253	0.16735	15.2214	0.0561459	191.348	0.0215765	21260.3	0.0110895
Information on Analysis and Constants Used in Calculations									Results		40(a)/36(a)	± 2s	40(r)/39(k)	± 2s	Age	± 2s	MSWD	39Ar(k)	K/Ca	± 2s
															(Ma)			(%,n)
Sample = 008_VU120-O1C				Age Equations = Min et al. (2000)					Age Plateau				4.53034	0.277205	2.23229	0.137078	1.80513	63.4054	0.400753	0.0925535
Material = groundmass				Negative Intensities = Allowed										0.0611885		0.0614067	0.0414926	13
Location = CH18-02 - Christiana				Decay Constant 40K = 5.460 ± 0.053 E-10 1/a					Full External Error							0.144825	1.8165	2σ Confidence Limit
Analyst = Klaudia Kuiper				Decay Constant 39Ar = 2.940 ± 0.016 E-07 1/h					Analytical Error							0.136507	1.34355	Error Magnification
Project = VU120				Decay Constant 37Ar = 8.230 ± 0.012 E-04 1/h
Mass Discrimination Law = LIN				Decay Constant 36Cl = 2.257 ± 0.015 E-06 1/a					Total Fusion Age				4.61678	0.177533	2.27485	0.0883449		25	0.45117	0.00152258
Irradiation = VU120				Decay Activity 40K(EC,β⁺) = 3.310 ± 0.030 1/gs										0.0384539		0.0388354
J = 0.00026920 ± 0.00000075				Decay Activity 40K(β⁻) = 27.890 ± 0.150 1/gs					Full External Error							0.100363
FCs = 28.201 ± 0.023 Ma				Atmospheric Ratio 40/36(a) = 298.56 ± 0.31					Analytical Error							0.0874227
IGSN = Undefined				Atmospheric Ratio 38/36(a) = 0.1885 ± 0.0003
Preferred Age = Undefined				Production Ratio 39/37(ca) = 0.000673 ± 0.000004					Normal Isochron Error Chron		298.602	2.85116	4.52199	1.0433	2.22818	0.513915	2.21788	63.4054
Classification = Undefined				Production Ratio 36/37(ca) = 0.000264 ± 0.000002								0.00954836		0.230716		0.230644	0.0111605	13
Experiment Type = Undefined				Production Ratio 40/39(k) = 0.000860 ± 0.000070					Full External Error							0.516027	1.8528	2σ Confidence Limit
Extraction Method = Undefined				Production Ratio 38/39(k) = 0.012110 ± 0.000030					Analytical Error							0.513763	1.48926	Error Magnification
Heating = 180 sec				Production Ratio 36/38(cl) = 262.80 ± 1.71												5		Number of Iterations
Isolation = 5.00 min				Scaling Ratio K/Ca = 0.430												6.10404e-06		Convergence
Instrument = HELIX				Abundance Ratio 40K/K = 1.1700 ± 0.0100 E-04
Lithology = Undefined				Atomic Weight K = 39.0983 ± 0.0001 g					Inverse Isochron Error Chron		298.618	2.84651	4.5227	0.968147	2.22853	0.47692	2.21203	63.4054
Lat-Lon = Undefined - Undefined												0.00953231		0.214064		0.214007	0.0114024	13
Feature = Undefined									Full External Error							0.479196	1.8528	2σ Confidence Limit
									Analytical Error							0.476757	1.48729	Error Magnification
																3		Number of Iterations
																0.000106302		Convergence
																0.0361793		Spreading Factor
[truncated: 15 more columns]

## Sheet: VU120-O2
Relative Abundances			36Ar [A]	%1s	37Ar [A]	%1s	38Ar [A]	%1s	39Ar [A]	%1s	40Ar [A]	%1s	40(r)/39(k)	± 2s	Age	± 2s	40Ar(r)	39Ar(k)	K/Ca	± 2s		Relative Abundances			36Ar [A]	%1s	37Ar [A]	%1s	38Ar [A]	%1s	39Ar [A]	%1s	40Ar [A]	%1s	40(r)/39(k)	± 2s	Age	± 2s	40Ar(r)	39Ar(k)	K/Ca	± 2s		Relative Abundances			36Ar [A]	%1s	37Ar [A]
															(Ma)		(%)	(%)																			(Ma)		(%)	(%)
153_VU120-O2A	5		-0.000272122	302.492	-0.0142091	69.3948	-0.000309382	119.961	0.00117926	101.369	-0.532916	28.201	-380.874	906.416	-198.173	498.098	84.965	0.00149215	-0.0359766	0.0879098		117_VU120-O2B	10		0.676832	0.455206	0.489963	3.39926	0.146302	0.386824	1.24394	0.212515	206.946	0.112629	3.94704	1.56314	1.94502	0.769876	2.37192	1.78023	1.09141	0.0743451		026_VU120-O2C	10		0.910803	0.291941	0.782746
154_VU120-O2A	7.5		0.0757832	1.10449	0.010772	121.205	0.014085	3.40591	0.0100006	12.0972	22.8484	0.660201	22.3542	58.8575	10.9906	28.8509	0.977724	0.0125431	0.398919	0.97183		118_VU120-O2B	14		1.13979	0.415106	3.56214	0.83119	0.333286	0.282731	8.37979	0.104987	377.838	0.0697019	4.51411	0.353412	2.2243	0.174036	10.0087	11.9922	1.01127	0.0169448		027_VU120-O2C	14		1.19237	0.274202	5.16486
156_VU120-O2A	10		0.709967	0.327647	0.346194	3.11835	0.151338	0.543151	0.922993	0.278114	215.873	0.0807846	4.2619	1.62405	2.10048	0.799956	1.82177	1.1582	1.14614	0.0717651		120_VU120-O2B	16	4	0.376746	0.546678	4.06229	0.754038	0.178504	0.587734	8.4201	0.105537	156.146	0.147096	5.22472	0.158794	2.5742	0.0781822	28.1648	12.0494	0.890992	0.0135679		029_VU120-O2C	16	4	0.393302	0.422709	6.19256
157_VU120-O2A	15		1.53709	0.34087	3.78878	0.71882	0.417921	0.260988	9.15019	0.101897	498.766	0.0487518	4.38861	0.361597	2.16289	0.178105	8.04894	11.4816	1.03819	0.0150748		121_VU120-O2B	18	4	0.254597	0.578067	4.61008	0.766628	0.14353	0.562863	7.95004	0.111547	118.428	0.191798	5.3822	0.126625	2.65173	0.0623412	36.1165	11.376	0.741241	0.0114849		030_VU120-O2C	18	4	0.309654	0.497097	7.25003
159_VU120-O2A	18		0.559739	0.372027	5.98121	0.637309	0.254329	0.35739	12.4562	0.0836439	231.294	0.0742347	5.19097	0.107623	2.55806	0.0529985	27.9466	15.6292	0.895207	0.0115084		123_VU120-O2B	20	4	0.224849	0.511522	6.45017	0.735878	0.147298	0.461469	8.9434	0.101403	115.133	0.202229	5.42596	0.0947587	2.67328	0.0466519	42.1277	12.7963	0.595922	0.00885348		032_VU120-O2C	20	4	0.244905	0.502706	7.56946
160_VU120-O2A	21	4	0.392947	0.703133	7.37824	0.65147	0.222941	0.310639	13.0389	0.0842908	187.979	0.08836	5.46505	0.130783	2.69302	0.0643989	37.8931	16.3594	0.75961	0.00997983		124_VU120-O2B	22	4	0.171784	0.76023	5.98724	0.743072	0.117637	0.55438	7.09669	0.116209	89.664	0.252051	5.47639	0.12859	2.6981	0.0633068	43.3196	10.1531	0.509391	0.0076624		033_VU120-O2C	22	4	0.187436	0.614875	7.55307
162_VU120-O2A	25	4	0.366781	0.433712	10.3483	0.589234	0.227358	0.362428	13.545	0.0813522	184.499	0.0891296	5.59881	0.0766565	2.75889	0.037745	41.0826	16.9922	0.562539	0.0066923		126_VU120-O2B	24	4	0.122874	0.98992	5.44398	0.912978	0.0883791	0.686406	5.4316	0.135814	66.5833	0.338145	5.58637	0.158789	2.75225	0.078172	45.5407	7.77008	0.428733	0.00791474		035_VU120-O2C	24	4	0.149464	0.725542	7.25814
163_VU120-O2A	30	4	0.317498	0.479632	13.6841	0.582163	0.199389	0.416863	11.9521	0.0974638	158.53	0.105269	5.42627	0.0834201	2.67393	0.0410772	40.8791	14.9901	0.375285	0.00443045		127_VU120-O2B	27	4	0.138804	0.780622	7.35542	0.709475	0.0963949	0.622191	6.10511	0.125329	73.9752	0.30333	5.42748	0.130554	2.67403	0.0642748	44.7562	8.73237	0.356617	0.0051387		036_VU120-O2C	27	4	0.1625	0.611899	8.64553
165_VU120-O2A	10	4	0.24772	0.498066	13.1471	0.600016	0.15141	0.456359	8.65733	0.0862323	119.296	0.130731	5.3611	0.0946316	2.64184	0.0465988	38.8659	10.8551	0.282863	0.0034294		129_VU120-O2B	30	4	0.126428	0.892022	7.08261	0.668691	0.081308	0.946976	4.84787	0.114732	63.6147	0.352266	5.45571	0.168268	2.68792	0.0828415	41.5353	6.9329	0.294035	0.00398995		038_VU120-O2C	30	4	0.12172	0.935555	6.73405
166_VU120-O2A	12	4	0.245857	0.617887	14.3719	0.594027	0.113937	0.627787	5.78087	0.105113	102.684	0.153828	5.26905	0.168862	2.59651	0.0831535	29.6139	7.24369	0.172671	0.00208341		130_VU120-O2B	9.5	4	0.112781	0.813885	6.35107	0.85011	0.0691571	0.732749	4.01205	0.1237	54.8039	0.410367	5.39683	0.178272	2.65893	0.0877679	39.4667	5.73713	0.271347	0.00466219		039_VU120-O2C	10	4	0.130959	0.861363	8.2104
168_VU120-O2A	15		0.171801	0.628387	10.8377	0.604644	0.0593276	0.931025	2.02636	0.123082	62.2379	0.244594	5.84321	0.357264	2.87922	0.175902	18.956	2.53422	0.0801093	0.000988774		132_VU120-O2B	12	4	0.186635	0.727077	13.6259	0.647871	0.0957167	0.658091	4.77999	0.127538	80.1408	0.283278	5.34272	0.196658	2.6323	0.0968216	31.8055	6.82941	0.150555	0.00198839		041_VU120-O2C	13		0.18736	0.737982	12.9901
169_VU120-O2A	21		0.194002	0.60634	8.72558	0.607792	0.0626699	0.917805	2.19066	0.147099	69.2915	0.220973	5.51826	0.355345	2.71922	0.174973	17.3993	2.74222	0.107667	0.00134678		133_VU120-O2B	21		0.225414	0.540598	15.5684	0.687953	0.0768303	0.741982	2.70053	0.130077	81.9254	0.274639	5.89234	0.322599	2.90287	0.158803	19.3478	3.85081	0.0742997	0.00104056		042_VU120-O2C	21		0.357891	0.51555	10.3506
		S	4.81891	0.157275	88.6058	0.212859	1.8744	0.136372	79.7317	0.0329964	1852.77	0.0315978												S	3.75754	0.187068	80.5892	0.239294	1.57434	0.157496	69.9111	0.0353363	1485.2	0.0537521												S	4.34836	0.137575	88.7016
Information on Analysis and Constants Used in Calculations									Results		40(a)/36(a)	± 2s	40(r)/39(k)	± 2s	Age	± 2s	MSWD	39Ar(k)	K/Ca	± 2s		Information on Analysis and Constants Used in Calculations									Results		40(a)/36(a)	± 2s	40(r)/39(k)	± 2s	Age	± 2s	MSWD	39Ar(k)	K/Ca	± 2s		Information on Analysis and Constants Used in Calculations
															(Ma)			(%,n)																			(Ma)			(%,n)
Sample = 153_VU120-O2A				Age Equations = Min et al. (2000)					Age Plateau Error Mean				5.46256	0.105811	2.6918	0.0542361	5.81163	66.4405	0.25867	0.132761		Sample = 117_VU120-O2B				Age Equations = Min et al. (2000)					Age Plateau				5.41902	0.0578819	2.66986	0.0321756	1.55737	82.3767	0.253325	0.106065		Sample = 026_VU120-O2C				Age Equations = Min et al. (2000)
Material = groundmass				Negative Intensities = Allowed										0.0193702		0.0201487	0.000113045	5				Material = groundmass				Negative Intensities = Allowed										0.0106813		0.0120514	0.131871	9				Material = groundmass				Negative Intensities = Allowed
Location = CH18-07 - Christiana				Decay Constant 40K = 5.460 ± 0.053 E-10 1/a					Full External Error							0.0782084	2.41421	2σ Confidence Limit				Location = CH18-07 - Christiana				Decay Constant 40K = 5.460 ± 0.053 E-10 1/a					Full External Error							0.0644884	2	2σ Confidence Limit				Location = CH18-07 - Christiana				Decay Constant 40K = 5.460 ± 0.053 E-10 1/a
Analyst = Klaudia Kuiper				Decay Constant 39Ar = 2.940 ± 0.016 E-07 1/h					Analytical Error							0.0521024	2.41073	Error Magnification				Analyst = Klaudia Kuiper				Decay Constant 39Ar = 2.940 ± 0.016 E-07 1/h					Analytical Error							0.0284966	1.24795	Error Magnification				Analyst = Klaudia Kuiper				Decay Constant 39Ar = 2.940 ± 0.016 E-07 1/h
Project = VU120				Decay Constant 37Ar = 8.230 ± 0.012 E-04 1/h																		Project = VU120				Decay Constant 37Ar = 8.230 ± 0.012 E-04 1/h																		Project = VU120				Decay Constant 37Ar = 8.230 ± 0.012 E-04 1/h
Mass Discrimination Law = LIN				Decay Constant 36Cl = 2.257 ± 0.015 E-06 1/a					Total Fusion Age				5.28352	0.0606847	2.60363	0.0332459		12	0.386645	0.00166571		Mass Discrimination Law = LIN				Decay Constant 36Cl = 2.257 ± 0.015 E-06 1/a					Total Fusion Age				5.29144	0.065721	2.60705	0.035494		12	0.372735	0.00180325		Mass Discrimination Law = LIN				Decay Constant 36Cl = 2.257 ± 0.015 E-06 1/a
Irradiation = VU120				Decay Activity 40K(EC,β⁺) = 3.310 ± 0.030 1/gs										0.0114857		0.012769						Irradiation = VU120				Decay Activity 40K(EC,β⁺) = 3.310 ± 0.030 1/gs										0.0124203		0.0136146						Irradiation = VU120				Decay Activity 40K(EC,β⁺) = 3.310 ± 0.030 1/gs
J = 0.00026925 ± 0.00000075				Decay Activity 40K(β⁻) = 27.890 ± 0.150 1/gs					Full External Error							0.0638421						J = 0.00026920 ± 0.00000075				Decay Activity 40K(β⁻) = 27.890 ± 0.150 1/gs					Full External Error							0.065101						J = 0.00026920 ± 0.00000075				Decay Activity 40K(β⁻) = 27.890 ± 0.150 1/gs
FCs = 28.201 ± 0.023 Ma				Atmospheric Ratio 40/36(a) = 298.56 ± 0.31					Analytical Error							0.0298832						FCs = 28.201 ± 0.023 Ma				Atmospheric Ratio 40/36(a) = 298.56 ± 0.31					Analytical Error							0.0323571						FCs = 28.201 ± 0.023 Ma				Atmospheric Ratio 40/36(a) = 298.56 ± 0.31
IGSN = Undefined				Atmospheric Ratio 38/36(a) = 0.1885 ± 0.0003																		IGSN = Undefined				Atmospheric Ratio 38/36(a) = 0.1885 ± 0.0003																		IGSN = Undefined				Atmospheric Ratio 38/36(a) = 0.1885 ± 0.0003
Preferred Age = Undefined				Production Ratio 39/37(ca) = 0.000673 ± 0.000004					Normal Isochron Error Chron		285.354	26.979	5.8353	0.772209	2.87533	0.380545	6.16618	66.4405				Preferred Age = Undefined				Production Ratio 39/37(ca) = 0.000673 ± 0.000004					Normal Isochron		287.827	6.79896	5.71781	0.195234	2.81696	0.0973945	0.456848	82.3767				Preferred Age = Undefined				Production Ratio 39/37(ca) = 0.000673 ± 0.000004
Classification = Undefined				Production Ratio 36/37(ca) = 0.000264 ± 0.000002								0.0945458		0.132334		0.132349	0.000347069	5				Classification = Undefined				Production Ratio 36/37(ca) = 0.000264 ± 0.000002								0.0236217		0.0341448		0.0345744	0.866107	9				Classification = Undefined				Production Ratio 36/37(ca) = 0.000264 ± 0.000002
Experiment Type = Undefined				Production Ratio 40/39(k) = 0.000860 ± 0.000070					Full External Error							0.385275	2.63299	2σ Confidence Limit				Experiment Type = Undefined				Production Ratio 40/39(k) = 0.000860 ± 0.000070					Full External Error							0.113853	2.06904	2σ Confidence Limit				Experiment Type = Undefined				Production Ratio 40/39(k) = 0.000860 ± 0.000070
Extraction Method = Undefined				Production Ratio 38/39(k) = 0.012110 ± 0.000030					Analytical Error							0.380205	2.48318	Error Magnification				Extraction Method = Undefined				Production Ratio 38/39(k) = 0.012110 ± 0.000030					Analytical Error							0.0961104	1	Error Magnification				Extraction Method = Undefined				Production Ratio 38/39(k) = 0.012110 ± 0.000030
Heating = 180 sec				Production Ratio 36/38(cl) = 262.80 ± 1.71												7		Number of Iterations				Heating = 180 sec				Production Ratio 36/38(cl) = 262.80 ± 1.71												9		Number of Iterations				Heating = 180 sec				Production Ratio 36/38(cl) = 262.80 ± 1.71
Isolation = 5.00 min				Scaling Ratio K/Ca = 0.430												4.27231e-05		Convergence				Isolation = 5.00 min				Scaling Ratio K/Ca = 0.430												2.9028e-05		Convergence				Isolation = 5.00 min				Scaling Ratio K/Ca = 0.430
Instrument = HELIX				Abundance Ratio 40K/K = 1.1700 ± 0.0100 E-04																		Instrument = HELIX				Abundance Ratio 40K/K = 1.1700 ± 0.0100 E-04																		Instrument = HELIX				Abundance Ratio 40K/K = 1.1700 ± 0.0100 E-04
Lithology = Undefined				Atomic Weight K = 39.0983 ± 0.0001 g					Inverse Isochron Error Chron		285.145	27.1369	5.84416	0.76398	2.87969	0.376498	6.20968	66.4405				Lithology = Undefined				Atomic Weight K = 39.0983 ± 0.0001 g					Inverse Isochron		287.767	6.79743	5.72013	0.194996	2.8181	0.09728	0.463545	82.3767				Lithology = Undefined				Atomic Weight K = 39.0983 ± 0.0001 g
Lat-Lon = Undefined - Undefined												0.0951686		0.130726		0.130743	0.000326185	5				Lat-Lon = Undefined - Undefined												0.0236213		0.0340894		0.0345197	0.861469	9				Lat-Lon = Undefined - Undefined
Feature = Undefined									Full External Error							0.381292	2.63299	2σ Confidence Limit				Feature = Undefined									Full External Error							0.113768	2.06904	2σ Confidence Limit				Feature = Undefined
									Analytical Error							0.376153	2.49192	Error Magnification													Analytical Error							0.0959934	1	Error Magnification
																3		Number of Iterations																				4		Number of Iterations
																0.000347579		Convergence																				6.07149e-05		Convergence
																0.111823		Spreading Factor																				0.163361		Spreading Factor
Relative Abundances			36Ar [A]	%1s	37Ar [A]	%1s	38Ar [A]	%1s	39Ar [A]	%1s	40Ar [A]	%1s	40(r)/39(k)	± 2s	Age	± 2s	40Ar(r)	39Ar(k)	K/Ca	± 2s
															(Ma)		(%)	(%)
026_VU120-O2C	10		0.910803	0.291941	0.782746	2.64885	0.206746	0.314335	2.02942	0.144945	279.201	0.0689536	3.61396	0.852186	1.78097	0.419755	2.62619	0.907382	1.11457	0.0591348
027_VU120-O2C	14		1.19237	0.274202	5.16486	0.864456	0.380848	0.273303	11.6939	0.070596	410.288	0.0515652	4.67845	0.182334	2.30522	0.0897853	13.3304	5.2283	0.973283	0.0168833
029_VU120-O2C	16	4	0.393302	0.422709	6.19256	0.828476	0.202073	0.364752	11.0361	0.0732709	176.373	0.101589	5.38687	0.0984995	2.65403	0.0484941	33.6941	4.93379	0.766034	0.0127424
030_VU120-O2C	18	4	0.309654	0.497097	7.25003	0.884641	0.182221	0.55748	10.4264	0.0879125	150.478	0.115976	5.62201	0.0966215	2.7698	0.0475665	38.936	4.66082	0.618102	0.0109899
032_VU120-O2C	20	4	0.244905	0.502706	7.56946	0.704228	0.146597	0.534323	8.64609	0.0751555	119.156	0.149848	5.39591	0.0965313	2.65848	0.047525	39.1303	3.86451	0.490871	0.006953
033_VU120-O2C	22	4	0.187436	0.614875	7.55307	0.768969	0.118176	0.702706	7.22394	0.068343	95.0095	0.1793	5.49088	0.107838	2.70524	0.0530903	41.7199	3.22849	0.410973	0.00634546
035_VU120-O2C	24	4	0.149464	0.725542	7.25814	0.710678	0.0955137	0.779274	5.77728	0.0713388	75.3719	0.225	5.42496	0.127874	2.67278	0.0629555	41.5473	2.58159	0.341979	0.00488521
036_VU120-O2C	27	4	0.1625	0.611899	8.64553	0.746289	0.0959287	0.70318	5.49675	0.086732	77.2446	0.219471	5.35527	0.126198	2.63847	0.0621314	38.0679	2.45571	0.2731	0.00410373
038_VU120-O2C	30	4	0.12172	0.935555	6.73405	0.731281	0.0691259	0.833984	3.82644	0.0712565	56.6171	0.298	5.44334	0.199741	2.68184	0.0983364	36.745	1.70927	0.244046	0.00358628
039_VU120-O2C	10	4	0.130959	0.861363	8.2104	0.671984	0.0651517	0.743801	3.43215	0.115892	56.9293	0.296405	5.3914	0.221481	2.65626	0.109041	32.4513	1.53249	0.179461	0.00244762
041_VU120-O2C	13		0.18736	0.737982	12.9901	0.62936	0.0633795	1.06043	2.29517	0.129089	69.6549	0.243373	6.44613	0.393981	3.17546	0.193913	21.1595	1.02256	0.0756855	0.000972664
042_VU120-O2C	21		0.357891	0.51555	10.3506	0.683553	0.0984974	0.517276	2.26065	0.143343	120.178	0.145013	6.27437	0.522359	3.09092	0.257111	11.7662	1.00791	0.0936254	0.00130798
117_VU120-O2B	10		0.676832	0.455206	0.489963	3.39926	0.146302	0.386824	1.24394	0.212515	206.946	0.112629	3.94704	1.56314	1.94502	0.769876	2.37192	0.55618	1.09141	0.0743451
118_VU120-O2B	14		1.13979	0.415106	3.56214	0.83119	0.333286	0.282731	8.37979	0.104987	377.838	0.0697019	4.51411	0.353412	2.2243	0.174036	10.0087	3.74662	1.01127	0.0169448
120_VU120-O2B	16	4	0.376746	0.546678	4.06229	0.754038	0.178504	0.587734	8.4201	0.105537	156.146	0.147096	5.22472	0.158794	2.5742	0.0781822	28.1648	3.7645	0.890992	0.0135679
121_VU120-O2B	18	4	0.254597	0.578067	4.61008	0.766628	0.14353	0.562863	7.95004	0.111547	118.428	0.191798	5.3822	0.126625	2.65173	0.0623412	36.1165	3.55411	0.741241	0.0114849
123_VU120-O2B	20	4	0.224849	0.511522	6.45017	0.735878	0.147298	0.461469	8.9434	0.101403	115.133	0.202229	5.42596	0.0947587	2.67328	0.0466519	42.1277	3.99782	0.595922	0.00885348
124_VU120-O2B	22	4	0.171784	0.76023	5.98724	0.743072	0.117637	0.55438	7.09669	0.116209	89.664	0.252051	5.47639	0.12859	2.6981	0.0633068	43.3196	3.17205	0.509391	0.0076624
126_VU120-O2B	24	4	0.122874	0.98992	5.44398	0.912978	0.0883791	0.686406	5.4316	0.135814	66.5833	0.338145	5.58637	0.158789	2.75225	0.078172	45.5407	2.42754	0.428733	0.00791474
127_VU120-O2B	27	4	0.138804	0.780622	7.35542	0.709475	0.0963949	0.622191	6.10511	0.125329	73.9752	0.30333	5.42748	0.130554	2.67403	0.0642748	44.7562	2.72817	0.356617	0.0051387
129_VU120-O2B	30	4	0.126428	0.892022	7.08261	0.668691	0.081308	0.946976	4.84787	0.114732	63.6147	0.352266	5.45571	0.168268	2.68792	0.0828415	41.5353	2.16598	0.294035	0.00398995
130_VU120-O2B	9.5	4	0.112781	0.813885	6.35107	0.85011	0.0691571	0.732749	4.01205	0.1237	54.8039	0.410367	5.39683	0.178272	2.65893	0.0877679	39.4667	1.7924	0.271347	0.00466219
132_VU120-O2B	12	4	0.186635	0.727077	13.6259	0.647871	0.0957167	0.658091	4.77999	0.127538	80.1408	0.283278	5.34272	0.196658	2.6323	0.0968216	31.8055	2.13365	0.150555	0.00198839
133_VU120-O2B	21		0.225414	0.540598	15.5684	0.687953	0.0768303	0.741982	2.70053	0.130077	81.9254	0.274639	5.89234	0.322599	2.90287	0.158803	19.3478	1.20307	0.0742997	0.00104056
153_VU120-O2A	5		-0.000272122	302.492	-0.0142091	69.3948	-0.000309382	119.961	0.00117926	101.369	-0.532916	28.201	-380.944	906.59	-198.173	498.101	84.965	0.000531579	-0.0359766	0.0879107
154_VU120-O2A	7.5		0.0757832	1.10449	0.010772	121.205	0.014085	3.40591	0.0100006	12.0972	22.8484	0.660201	22.3584	58.8687	10.9906	28.851	0.977724	0.00446851	0.398919	0.97184
156_VU120-O2A	10		0.709967	0.327647	0.346194	3.11835	0.151338	0.543151	0.922993	0.278114	215.873	0.0807846	4.26269	1.6247	2.10048	0.800129	1.82177	0.412609	1.14614	0.0729041
157_VU120-O2A	15		1.53709	0.34087	3.78878	0.71882	0.417921	0.260988	9.15019	0.101897	498.766	0.0487518	4.38942	0.363331	2.16289	0.178926	8.04894	4.09034	1.03819	0.0190382
159_VU120-O2A	18		0.559739	0.372027	5.98121	0.637309	0.254329	0.35739	12.4562	0.0836439	231.294	0.0742347	5.19194	0.115229	2.55806	0.0567334	27.9466	5.56793	0.895207	0.0152633
160_VU120-O2A	21	4	0.392947	0.703133	7.37824	0.65147	0.222941	0.310639	13.0389	0.0842908	187.979	0.08836	5.46606	0.137784	2.69302	0.0678337	37.8931	5.82807	0.75961	0.013114
162_VU120-O2A	25	4	0.366781	0.433712	10.3483	0.589234	0.227358	0.362428	13.545	0.0813522	184.499	0.0891296	5.59985	0.0885731	2.75889	0.0436045	41.0826	6.05348	0.562539	0.00919143
163_VU120-O2A	30	4	0.317498	0.479632	13.6841	0.582163	0.199389	0.416863	11.9521	0.0974638	158.53	0.105269	5.42728	0.0938559	2.67393	0.0462074	40.8791	5.34023	0.375285	0.00610702
165_VU120-O2A	10	4	0.24772	0.498066	13.1471	0.600016	0.15141	0.456359	8.65733	0.0862323	119.296	0.130731	5.3621	0.103739	2.64184	0.051074	38.8659	3.86714	0.282863	0.00466878
166_VU120-O2A	12	4	0.245857	0.617887	14.3719	0.594027	0.113937	0.627787	5.78087	0.105113	102.684	0.153828	5.27003	0.173974	2.59651	0.0856549	29.6139	2.58057	0.172671	0.00284265
168_VU120-O2A	15		0.171801	0.628387	10.8377	0.604644	0.0593276	0.931025	2.02636	0.123082	62.2379	0.244594	5.84429	0.360316	2.87922	0.177372	18.956	0.90282	0.0801093	0.00133517
169_VU120-O2A	21		0.194002	0.60634	8.72558	0.607792	0.0626699	0.917805	2.19066	0.147099	69.2915	0.220973	5.51928	0.358089	2.71922	0.176291	17.3993	0.976921	0.107667	0.00180774
		S	12.9248	0.092404	257.897	0.129841	5.173	0.0850429	223.787	0.0183018	5024.46	0.0232007
Information on Analysis and Constants Used in Calculations									Results		40(a)/36(a)	± 2s	40(r)/39(k)	± 2s	Age	± 2s	MSWD	39Ar(k)	K/Ca	± 2s
															(Ma)			(%,n)
Sample = 026_VU120-O2C				Age Equations = Min et al. (2000)					Age Plateau Error Mean				5.44289	0.0410945	2.68161	0.0251893	2.46111	74.3724	0.26083	0.0592777
Material = groundmass				Negative Intensities = Allowed										0.00755012		0.00939334	0.000211757	22
Location = CH18-07 - Christiana				Decay Constant 40K = 5.460 ± 0.053 E-10 1/a					Full External Error							0.0615266	1.61721	2σ Confidence Limit
Analyst = Klaudia Kuiper				Decay Constant 39Ar = 2.940 ± 0.016 E-07 1/h					Analytical Error							0.0202317	1.56879	Error Magnification
Project = VU120				Decay Constant 37Ar = 8.230 ± 0.012 E-04 1/h
Mass Discrimination Law = LIN				Decay Constant 36Cl = 2.257 ± 0.015 E-06 1/a					Total Fusion Age				5.30314	0.0350348	2.61281	0.0226122		36	0.372838	0.00110996
Irradiation = VU120				Decay Activity 40K(EC,β⁺) = 3.310 ± 0.030 1/gs										0.00660642		0.00865435
J = 0.00026920 ± 0.00000075				Decay Activity 40K(β⁻) = 27.890 ± 0.150 1/gs					Full External Error							0.0591845
FCs = 28.201 ± 0.023 Ma				Atmospheric Ratio 40/36(a) = 298.56 ± 0.31					Analytical Error							0.017249
IGSN = Undefined				Atmospheric Ratio 38/36(a) = 0.1885 ± 0.0003
Preferred Age = Undefined				Production Ratio 39/37(ca) = 0.000673 ± 0.000004					Normal Isochron Error Chron		289.156	7.23299	5.71244	0.211603	2.81431	0.105353	1.99603	74.3724
Classification = Undefined				Production Ratio 36/37(ca) = 0.000264 ± 0.000002								0.0250142		0.0370425		0.0374346	0.00511204	22
Experiment Type = Undefined				Production Ratio 40/39(k) = 0.000860 ± 0.000070					Full External Error							0.120704	1.63246	2σ Confidence Limit
Extraction Method = Undefined				Production Ratio 38/39(k) = 0.012110 ± 0.000030					Analytical Error							0.104169	1.41281	Error Magnification
Heating = 180 sec				Production Ratio 36/38(cl) = 262.80 ± 1.71												6		Number of Iterations
Isolation = 5.00 min				Scaling Ratio K/Ca = 0.430												5.20427e-05		Convergence
Instrument = HELIX				Abundance Ratio 40K/K = 1.1700 ± 0.0100 E-04
Lithology = Undefined				Atomic Weight K = 39.0983 ± 0.0001 g					Inverse Isochron Error Chron		289.126	7.32024	5.71533	0.212757	2.81574	0.105916	2.03408	74.3724
Lat-Lon = Undefined - Undefined												0.0253185		0.0372257		0.0376156	0.00409203	22
Feature = Undefined									Full External Error							0.121211	1.63246	2σ Confidence Limit
									Analytical Error							0.104737	1.42621	Error Magnification
																4		Number of Iterations
																4.71617e-05		Convergence
																0.163224		Spreading Factor
[truncated: 15 more columns]

## Sheet: VU120-O3
Relative Abundances			36Ar [A]	%1s	37Ar [A]	%1s	38Ar [A]	%1s	39Ar [A]	%1s	40Ar [A]	%1s	40(r)/39(k)	± 2s	Age	± 2s	40Ar(r)	39Ar(k)	K/Ca	± 2s		Relative Abundances			36Ar [A]	%1s	37Ar [A]	%1s	38Ar [A]	%1s	39Ar [A]	%1s	40Ar [A]	%1s	40(r)/39(k)	± 2s	Age	± 2s	40Ar(r)	39Ar(k)	K/Ca	± 2s		Relative Abundances			36Ar [A]	%1s	37Ar [A]
															(Ma)		(%)	(%)																			(Ma)		(%)	(%)
177_VU120-O3A	5		0.00269181	55.0212	0.0119629	113.895	7.46403e-05	827.951	0.00049147	128.356	0.0197594	1437.26	-1619.64	4753.83	-1049.43	4159.25	-3962.49	0.000841683	0.0173762	0.0601972		141_VU120-O3B	10		0.515126	0.492396	0.202425	9.17932	0.101818	0.781946	0.251987	0.363823	154.778	0.0864372	3.96078	6.23763	1.95179	3.07214	0.644491	0.447936	0.534992	0.0982944		050_VU120-O3C	10		0.404105	0.497248	0.290992
178_VU120-O3A	7.5		0.0529124	2.71612	0.0204094	68.6657	0.00978469	6.6764	0.0169961	4.18824	15.805	1.79613	0.536031	60.6218	0.264316	29.8904	0.057596	0.0295681	0.357796	0.49228		142_VU120-O3B	15		1.67331	0.386601	4.26845	0.781686	0.351793	0.316303	2.56075	0.127191	505.262	0.0418222	2.35038	1.57249	1.15847	0.774815	1.18988	4.54939	0.257679	0.00408158		051_VU120-O3C	15		1.84572	0.228835	4.89237
180_VU120-O3A	10		0.929278	0.374283	0.447084	2.9935	0.17753	0.28638	0.462033	1.94065	274.465	0.126621	-6.37956	4.91131	-3.14869	2.42611	-1.07323	0.803924	0.444089	0.031692		144_VU120-O3B	18		0.322983	0.6508	7.86413	0.712953	0.119022	0.786951	4.43269	0.128481	121.1	0.330471	5.71146	0.339558	2.81383	0.167159	20.881	7.87447	0.242084	0.00350763		053_VU120-O3C	18		0.24547	0.457241	9.04409
181_VU120-O3A	15		1.70361	0.3162	5.12661	0.626738	0.364133	0.335861	2.98722	0.323863	518.481	0.0703228	3.43624	1.16099	1.69374	0.571993	1.97749	5.19505	0.250267	0.00353198		145_VU120-O3B	21	4	0.144763	1.11907	9.2663	0.666907	0.100194	0.856327	6.13847	0.112648	75.672	0.527989	5.41021	0.205488	2.66552	0.101167	43.8427	10.9066	0.284564	0.00384944		054_VU120-O3C	21		0.0653048	1.50004	11.6099
183_VU120-O3A	18	4	0.21799	0.565172	9.94035	0.629923	0.113043	0.48177	6.01707	0.179092	97.3324	0.338254	5.49507	0.166951	2.7078	0.0822073	33.9326	10.4647	0.259997	0.00340566		147_VU120-O3B	23	4	0.123778	1.28929	7.95644	0.777878	0.0895461	0.90811	5.74922	0.147476	67.1107	0.596859	5.35839	0.217724	2.64001	0.107193	45.8613	10.2159	0.310423	0.00491561		056_VU120-O3C	23	4	0.0294266	2.60446	8.91365
184_VU120-O3A	21	4	0.12952	0.76185	8.63666	0.64229	0.0916512	0.641657	6.03172	0.176897	70.525	0.467015	5.39855	0.1485	2.66028	0.0731241	46.1271	10.4917	0.300016	0.00399772		148_VU120-O3B	25	4	0.163587	1.07559	8.2472	0.66173	0.109264	0.792378	6.56067	0.11174	82.6588	0.482915	5.25739	0.202231	2.59028	0.0995674	41.6928	11.6588	0.341777	0.00458742		057_VU120-O3C	25	4	0.027482	3.04599	8.22385
186_VU120-O3A	25	4	0.251194	0.486475	12.9121	0.634651	0.162698	0.549265	10.0404	0.118846	127.503	0.258887	5.33461	0.100106	2.62879	0.0492949	41.9719	17.4663	0.334079	0.00431431		150_VU120-O3B	26.6	4	0.203746	0.957538	7.78982	0.706421	0.114057	0.770084	6.40012	0.149462	92.8725	0.432051	5.10573	0.222608	2.51561	0.109605	35.1563	11.3738	0.352999	0.0050979		059_VU120-O3C	26.6	4	0.0311488	2.45213	7.90859
187_VU120-O3A	30	4	0.641244	0.348016	17.4625	0.594242	0.295169	0.286056	14.6848	0.103679	266.885	0.126802	5.23406	0.105934	2.57928	0.0521663	28.7762	25.5473	0.361312	0.00435911		151_VU120-O3B	28.3	4	0.259617	0.714764	6.43737	0.736205	0.10856	0.641002	5.18066	0.111505	101.46	0.395412	4.72375	0.266311	2.32753	0.131136	24.0998	9.2065	0.345766	0.00514925		060_VU120-O3C	28.3	4	0.0401569	2.0052	8.66711
189_VU120-O3A	10	4	0.0529532	1.57109	11.8294	0.632596	0.120083	0.506496	9.20251	0.127003	62.9447	0.521801	5.22695	0.0906342	2.57578	0.044632	76.3519	16.0087	0.334223	0.00431309		153_VU120-O3B	30	4	0.278178	0.673009	4.5862	0.776932	0.0979046	0.836903	3.68005	0.121138	101.808	0.39281	5.19809	0.376962	2.56109	0.185599	18.7739	6.53976	0.34475	0.00542178		062_VU120-O3C	30	4	0.0330363	2.5025	4.8503
190_VU120-O3A	12	4	0.0688975	1.14007	9.97033	0.594667	0.0699065	0.702517	4.47468	0.236776	43.635	0.751582	5.33738	0.182498	2.63016	0.0898668	54.6517	7.7792	0.192694	0.00246728		154_VU120-O3B	9.5	4	0.0375414	3.74781	5.27335	0.778347	0.0556393	1.2678	3.96831	0.136977	31.5172	1.26223	5.22632	0.292259	2.57499	0.143894	65.7455	7.05164	0.323295	0.0051102		063_VU120-O3C	9.5	4	0.0286705	2.47334	5.84089
192_VU120-O3A	15	4	0.0528589	1.5961	5.546	0.687452	0.0304201	1.33703	1.54779	0.59854	23.5529	1.39391	5.31546	0.5402	2.61936	0.26601	34.8465	2.68836	0.119716	0.00218471		156_VU120-O3B	10	4	0.0449073	3.25595	5.61596	0.738739	0.0554816	1.32657	3.88436	0.111983	33.5395	1.18717	5.30109	0.304838	2.6118	0.150084	61.3345	6.90191	0.297126	0.00444023		065_VU120-O3C	10	4	0.0359961	2.19112	5.65259
193_VU120-O3A	21	4	0.147021	0.805322	7.3106	0.64547	0.0524953	1.03281	2.02914	0.451897	53.7953	0.611019	5.17499	0.481314	2.55019	0.237022	19.4726	3.52438	0.119062	0.00187777		157_VU120-O3B	12	4	0.179488	0.937188	8.9961	0.649988	0.0808783	1.10106	3.80721	0.124875	72.6277	0.548977	5.19463	0.338899	2.55939	0.166858	27.1874	6.76065	0.18169	0.00240526		066_VU120-O3C	12	4	0.150794	0.697301	8.32681
																						159_VU120-O3B	21		3.13982	0.395399	11.4921	0.634514	0.633965	0.316595	3.66944	0.125565	946.385	0.052804	2.6932	2.11097	1.32738	1.04005	1.04204	6.51262	0.13701	0.00177257		068_VU120-O3C	21		1.7095	0.27663	10.1822
		S	4.25017	0.178819	89.2139	0.220992	1.48699	0.161782	57.4948	0.0601958	1554.94	0.0729461
																								S	7.08685	0.215296	87.9958	0.209286	2.01812	0.176475	56.2839	0.0378724	2386.79	0.0578958												S	4.64682	0.155025	94.4033
Information on Analysis and Constants Used in Calculations									Results		40(a)/36(a)	± 2s	40(r)/39(k)	± 2s	Age	± 2s	MSWD	39Ar(k)	K/Ca	± 2s
															(Ma)			(%,n)				Information on Analysis and Constants Used in Calculations									Results		40(a)/36(a)	± 2s	40(r)/39(k)	± 2s	Age	± 2s	MSWD	39Ar(k)	K/Ca	± 2s		Information on Analysis and Constants Used in Calculations
																																					(Ma)			(%,n)
Sample = 177_VU120-O3A				Age Equations = Min et al. (2000)					Age Plateau				5.30184	0.0639103	2.61265	0.0347017	1.75482	93.9706	0.193132	0.0662033
Material = groundmass				Negative Intensities = Allowed										0.0120544		0.0132822	0.091605	8				Sample = 141_VU120-O3B				Age Equations = Min et al. (2000)					Age Plateau Error Mean				5.21722	0.13427	2.57051	0.0676547	2.55501	80.6156	0.275322	0.0484158		Sample = 050_VU120-O3C				Age Equations = Min et al. (2000)
Location = CH18-12A - Christiana				Decay Constant 40K = 5.460 ± 0.053 E-10 1/a					Full External Error							0.0647714	2.06904	2σ Confidence Limit				Material = groundmass				Negative Intensities = Allowed										0.0257359		0.0263196	0.0087932	9				Material = groundmass				Negative Intensities = Allowed
Analyst = Klaudia Kuiper				Decay Constant 39Ar = 2.940 ± 0.016 E-07 1/h					Analytical Error							0.0314714	1.3247	Error Magnification				Location = CH18-12A - Christiana				Decay Constant 40K = 5.460 ± 0.053 E-10 1/a					Full External Error							0.0864444	2	2σ Confidence Limit				Location = CH18-12A - Christiana				Decay Constant 40K = 5.460 ± 0.053 E-10 1/a
Project = VU120				Decay Constant 37Ar = 8.230 ± 0.012 E-04 1/h																		Analyst = Klaudia Kuiper				Decay Constant 39Ar = 2.940 ± 0.016 E-07 1/h					Analytical Error							0.0661078	1.59844	Error Magnification				Analyst = Klaudia Kuiper				Decay Constant 39Ar = 2.940 ± 0.016 E-07 1/h
Mass Discrimination Law = LIN				Decay Constant 36Cl = 2.257 ± 0.015 E-06 1/a					Total Fusion Age				5.10137	0.0913633	2.51393	0.0471407		12	0.276829	0.00126821		Project = VU120				Decay Constant 37Ar = 8.230 ± 0.012 E-04 1/h																		Project = VU120				Decay Constant 37Ar = 8.230 ± 0.012 E-04 1/h
Irradiation = VU120				Decay Activity 40K(EC,β⁺) = 3.310 ± 0.030 1/gs										0.0179095		0.0187518						Mass Discrimination Law = LIN				Decay Constant 36Cl = 2.257 ± 0.015 E-06 1/a					Total Fusion Age				4.9414	0.174093	2.4347	0.0867972		13	0.274747	0.00116873		Mass Discrimination Law = LIN				Decay Constant 36Cl = 2.257 ± 0.015 E-06 1/a
J = 0.00026925 ± 0.00000075				Decay Activity 40K(β⁻) = 27.890 ± 0.150 1/gs					Full External Error							0.0706522						Irradiation = VU120				Decay Activity 40K(EC,β⁺) = 3.310 ± 0.030 1/gs										0.0352315		0.03565						Irradiation = VU120				Decay Activity 40K(EC,β⁺) = 3.310 ± 0.030 1/gs
FCs = 28.201 ± 0.023 Ma				Atmospheric Ratio 40/36(a) = 298.56 ± 0.31					Analytical Error							0.0449925						J = 0.00026920 ± 0.00000075				Decay Activity 40K(β⁻) = 27.890 ± 0.150 1/gs					Full External Error							0.100655						J = 0.00026925 ± 0.00000075				Decay Activity 40K(β⁻) = 27.890 ± 0.150 1/gs
IGSN = Undefined				Atmospheric Ratio 38/36(a) = 0.1885 ± 0.0003																		FCs = 28.201 ± 0.023 Ma				Atmospheric Ratio 40/36(a) = 298.56 ± 0.31					Analytical Error							0.0857211						FCs = 28.201 ± 0.023 Ma				Atmospheric Ratio 40/36(a) = 298.56 ± 0.31
Preferred Age = Undefined				Production Ratio 39/37(ca) = 0.000673 ± 0.000004					Normal Isochron		299.478	4.56767	5.27799	0.127808	2.60091	0.0645979	2.02705	93.9706				IGSN = Undefined				Atmospheric Ratio 38/36(a) = 0.1885 ± 0.0003																		IGSN = Undefined				Atmospheric Ratio 38/36(a) = 0.1885 ± 0.0003
Classification = Undefined				Production Ratio 36/37(ca) = 0.000264 ± 0.000002								0.0152521		0.0242152		0.0248367	0.0584443	8				Preferred Age = Undefined				Production Ratio 39/37(ca) = 0.000673 ± 0.000004					Normal Isochron Error Chron		291.94	7.68362	5.40408	0.253325	2.66251	0.125605	2.13023	80.6156				Preferred Age = Undefined				Production Ratio 39/37(ca) = 0.000673 ± 0.000004
Experiment Type = Undefined				Production Ratio 40/39(k) = 0.000860 ± 0.000070					Full External Error							0.084482	2.1547	2σ Confidence Limit				Classification = Undefined				Production Ratio 36/37(ca) = 0.000264 ± 0.000002								0.0263192		0.0468766		0.0471756	0.0371491	9				Classification = Undefined				Production Ratio 36/37(ca) = 0.000264 ± 0.000002
Extraction Method = Undefined				Production Ratio 38/39(k) = 0.012110 ± 0.000030					Analytical Error							0.0629369	1.42375	Error Magnification				Experiment Type = Undefined				Production Ratio 40/39(k) = 0.000860 ± 0.000070					Full External Error							0.137415	2.06904	2σ Confidence Limit				Experiment Type = Undefined				Production Ratio 40/39(k) = 0.000860 ± 0.000070
Heating = 180 sec				Production Ratio 36/38(cl) = 262.80 ± 1.71												24		Number of Iterations				Extraction Method = Undefined				Production Ratio 38/39(k) = 0.012110 ± 0.000030					Analytical Error							0.124719	1.45953	Error Magnification				Extraction Method = Undefined				Production Ratio 38/39(k) = 0.012110 ± 0.000030
Isolation = 5.00 min				Scaling Ratio K/Ca = 0.430												4.44236e-05		Convergence				Heating = 180 sec				Production Ratio 36/38(cl) = 262.80 ± 1.71												14		Number of Iterations				Heating = 180 sec				Production Ratio 36/38(cl) = 262.80 ± 1.71
Instrument = HELIX				Abundance Ratio 40K/K = 1.1700 ± 0.0100 E-04																		Isolation = 5.00 min				Scaling Ratio K/Ca = 0.430												4.08769e-05		Convergence				Isolation = 5.00 min				Scaling Ratio K/Ca = 0.430
Lithology = Undefined				Atomic Weight K = 39.0983 ± 0.0001 g					Inverse Isochron		299.468	4.62865	5.28059	0.129718	2.60219	0.0655165	2.04204	93.9706				Instrument = HELIX				Abundance Ratio 40K/K = 1.1700 ± 0.0100 E-04																		Instrument = HELIX				Abundance Ratio 40K/K = 1.1700 ± 0.0100 E-04
Lat-Lon = Undefined - Undefined												0.0154562		0.0245651		0.0251775	0.0565724	8				Lithology = Undefined				Atomic Weight K = 39.0983 ± 0.0001 g					Inverse Isochron Error Chron		292.119	7.64619	5.40514	0.251305	2.66303	0.124618	2.09884	80.6156				Lithology = Undefined				Atomic Weight K = 39.0983 ± 0.0001 g
Feature = Undefined									Full External Error							0.0852036	2.1547	2σ Confidence Limit				Lat-Lon = Undefined - Undefined												0.0261749		0.0464938		0.0467958	0.0401584	9				Lat-Lon = Undefined - Undefined
									Analytical Error							0.0638777	1.429	Error Magnification				Feature = Undefined									Full External Error							0.136518	2.06904	2σ Confidence Limit				Feature = Undefined
																4		Number of Iterations													Analytical Error							0.123724	1.44874	Error Magnification
																0.00021397		Convergence																				5		Number of Iterations
																0.572744		Spreading Factor																				6.60051e-05		Convergence
																																						0.484792		Spreading Factor
Relative Abundances			36Ar [A]	%1s	37Ar [A]	%1s	38Ar [A]	%1s	39Ar [A]	%1s	40Ar [A]	%1s	40(r)/39(k)	± 2s	Age	± 2s	40Ar(r)	39Ar(k)	K/Ca	± 2s
															(Ma)		(%)	(%)
050_VU120-O3C	10		0.404105	0.497248	0.290992	7.5622	0.0778409	0.685736	0.209293	1.11233	121.861	0.155405	5.90137	6.13727	2.90786	3.02169	1.0126	0.118709	0.308984	0.0472358
051_VU120-O3C	15		1.84572	0.228835	4.89237	0.794802	0.392767	0.1957	2.95927	0.124958	567.351	0.0434071	5.64116	0.951872	2.77974	0.468688	2.93913	1.67818	0.259807	0.00418075
053_VU120-O3C	18		0.24547	0.457241	9.04409	0.688848	0.114038	0.446044	5.32702	0.10837	103.131	0.173014	5.74189	0.146046	2.82933	0.0719089	29.6246	3.02082	0.252983	0.0035283
054_VU120-O3C	21		0.0653048	1.50004	11.6099	0.671163	0.105328	0.404119	8.06806	0.0807566	62.8546	0.27892	5.49181	0.0852359	2.7062	0.0419706	70.425	4.57599	0.29853	0.00403621
056_VU120-O3C	23	4	0.0294266	2.60446	8.91365	0.69133	0.0902858	0.687328	7.13446	0.0830881	45.9891	0.378397	5.31671	0.0811942	2.61998	0.0399824	82.4107	4.047	0.343882	0.00478899
057_VU120-O3C	25	4	0.027482	3.04599	8.22385	0.703624	0.0864502	0.818441	6.80511	0.0822723	43.5613	0.398553	5.29425	0.0899802	2.60892	0.0443091	82.639	3.86028	0.355529	0.00503732
059_VU120-O3C	26.6	4	0.0311488	2.45213	7.90859	0.741858	0.0846381	0.705813	6.71784	0.0792249	43.898	0.395565	5.24629	0.0858671	2.5853	0.0422843	80.2219	3.81085	0.364968	0.00544593
060_VU120-O3C	28.3	4	0.0401569	2.0052	8.66711	0.754187	0.0904804	0.596102	6.96427	0.0841998	48.0543	0.365573	5.28024	0.0861305	2.60202	0.0424136	76.4598	3.95047	0.345228	0.00523974
062_VU120-O3C	30	4	0.0330363	2.5025	4.8503	0.846397	0.0509089	1.00419	3.7531	0.131447	28.955	0.602707	5.19243	0.161907	2.55877	0.0797302	67.2449	2.12887	0.332439	0.00569509
063_VU120-O3C	9.5	4	0.0286705	2.47334	5.84089	0.901306	0.0553024	0.931055	4.13524	0.0958085	29.75	0.583036	5.23975	0.132964	2.58208	0.0654769	72.7629	2.34544	0.304142	0.00551345
065_VU120-O3C	10	4	0.0359961	2.19112	5.65259	0.800614	0.0518961	0.766042	3.64377	0.123091	29.3829	0.603353	5.24138	0.162594	2.58288	0.0800677	64.9305	2.0665	0.276897	0.00448596
066_VU120-O3C	12	4	0.150794	0.697301	8.32681	0.780931	0.0691731	0.804791	3.12697	0.130237	61.4957	0.284915	5.48756	0.232727	2.70411	0.114596	27.8535	1.77207	0.161189	0.00255244
068_VU120-O3C	21		1.7095	0.27663	10.1822	0.663775	0.37398	0.238964	3.69126	0.141026	531.739	0.0552359	6.01166	0.834191	2.96216	0.410703	4.16547	2.09173	0.155595	0.00211188
141_VU120-O3B	10		0.515126	0.492396	0.202425	9.17932	0.101818	0.781946	0.251987	0.363823	154.778	0.0864372	3.96005	6.23655	1.95179	3.07218	0.644491	0.143008	0.534992	0.0984768
142_VU120-O3B	15		1.67331	0.386601	4.26845	0.781686	0.351793	0.316303	2.56075	0.127191	505.262	0.0418222	2.34995	1.57231	1.15847	0.774869	1.18988	1.45244	0.257679	0.00499883
144_VU120-O3B	18		0.322983	0.6508	7.86413	0.712953	0.119022	0.786951	4.43269	0.128481	121.1	0.330471	5.7104	0.342494	2.81383	0.168636	20.881	2.514	0.242084	0.00443338
145_VU120-O3B	21	4	0.144763	1.11907	9.2663	0.666907	0.100194	0.856327	6.13847	0.112648	75.672	0.527989	5.4092	0.209869	2.66552	0.103343	43.8427	3.48206	0.284564	0.00499759
147_VU120-O3B	23	4	0.123778	1.28929	7.95644	0.777878	0.0895461	0.90811	5.74922	0.147476	67.1107	0.596859	5.3574	0.22178	2.64001	0.10921	45.8613	3.26153	0.310423	0.00602088
148_VU120-O3B	25	4	0.163587	1.07559	8.2472	0.66173	0.109264	0.792378	6.56067	0.11174	82.6588	0.482915	5.25641	0.206434	2.59028	0.101656	41.6928	3.72219	0.341777	0.00597472
150_VU120-O3B	26.6	4	0.203746	0.957538	7.78982	0.706421	0.114057	0.770084	6.40012	0.149462	92.8725	0.432051	5.10478	0.226209	2.51561	0.111398	35.1563	3.6312	0.352999	0.00645131
151_VU120-O3B	28.3	4	0.259617	0.714764	6.43737	0.736205	0.10856	0.641002	5.18066	0.111505	101.46	0.395412	4.72287	0.268875	2.32753	0.132423	24.0998	2.93927	0.345766	0.00644295
153_VU120-O3B	30	4	0.278178	0.673009	4.5862	0.776932	0.0979046	0.836903	3.68005	0.121138	101.808	0.39281	5.19713	0.379133	2.56109	0.186702	18.7739	2.08789	0.34475	0.00665617
154_VU120-O3B	9.5	4	0.0375414	3.74781	5.27335	0.778347	0.0556393	1.2678	3.96831	0.136977	31.5172	1.26223	5.22535	0.295121	2.57499	0.14533	65.7455	2.25131	0.323295	0.00626299
156_VU120-O3B	10	4	0.0449073	3.25595	5.61596	0.738739	0.0554816	1.32657	3.88436	0.111983	33.5395	1.18717	5.3001	0.307658	2.6118	0.1515	61.3345	2.2035	0.297126	0.00554887
157_VU120-O3B	12	4	0.179488	0.937188	8.9961	0.649988	0.0808783	1.10106	3.80721	0.124875	72.6277	0.548977	5.19367	0.341324	2.55939	0.168083	27.1874	2.15841	0.18169	0.00315058
159_VU120-O3B	21		3.13982	0.395399	11.4921	0.634514	0.633965	0.316595	3.66944	0.125565	946.385	0.052804	2.6927	2.11069	1.32738	1.0401	1.04204	2.07922	0.13701	0.00234451
177_VU120-O3A	5		0.00269181	55.0212	0.0119629	113.895	7.46403e-05	827.951	0.00049147	128.356	0.0197594	1437.26	-1619.64	4753.83	-1049.43	4159.25	-3962.49	0.000274448	0.0173762	0.0601972
178_VU120-O3A	7.5		0.0529124	2.71612	0.0204094	68.6657	0.00978469	6.6764	0.0169961	4.18824	15.805	1.79613	0.536031	60.6218	0.264316	29.8904	0.057596	0.00964128	0.357796	0.49228
180_VU120-O3A	10		0.929278	0.374283	0.447084	2.9935	0.17753	0.28638	0.462033	1.94065	274.465	0.126621	-6.37956	4.91131	-3.14869	2.42611	-1.07323	0.262136	0.444089	0.031692
181_VU120-O3A	15		1.70361	0.3162	5.12661	0.626738	0.364133	0.335861	2.98722	0.323863	518.481	0.0703228	3.43624	1.16099	1.69374	0.571993	1.97749	1.69395	0.250267	0.00353198
183_VU120-O3A	18		0.21799	0.565172	9.94035	0.629923	0.113043	0.48177	6.01707	0.179092	97.3324	0.338254	5.49507	0.166951	2.7078	0.0822073	33.9326	3.41224	0.259997	0.00340566
184_VU120-O3A	21	4	0.12952	0.76185	8.63666	0.64229	0.0916512	0.641657	6.03172	0.176897	70.525	0.467015	5.39855	0.1485	2.66028	0.0731241	46.1271	3.42105	0.300016	0.00399772
186_VU120-O3A	25	4	0.251194	0.486475	12.9121	0.634651	0.162698	0.549265	10.0404	0.118846	127.503	0.258887	5.33461	0.100106	2.62879	0.0492949	41.9719	5.69525	0.334079	0.00431431
187_VU120-O3A	30	4	0.641244	0.348016	17.4625	0.594242	0.295169	0.286056	14.6848	0.103679	266.885	0.126802	5.23406	0.105934	2.57928	0.0521663	28.7762	8.33022	0.361312	0.00435911
189_VU120-O3A	10	4	0.0529532	1.57109	11.8294	0.632596	0.120083	0.506496	9.20251	0.127003	62.9447	0.521801	5.22695	0.0906342	2.57578	0.044632	76.3519	5.21996	0.334223	0.00431309
190_VU120-O3A	12	4	0.0688975	1.14007	9.97033	0.594667	0.0699065	0.702517	4.47468	0.236776	43.635	0.751582	5.33738	0.182498	2.63016	0.0898668	54.6517	2.53657	0.192694	0.00246728
192_VU120-O3A	15	4	0.0528589	1.5961	5.546	0.687452	0.0304201	1.33703	1.54779	0.59854	23.5529	1.39391	5.31546	0.5402	2.61936	0.26601	34.8465	0.876597	0.119716	0.00218471
193_VU120-O3A	21	4	0.147021	0.805322	7.3106	0.64547	0.0524953	1.03281	2.02914	0.451897	53.7953	0.611019	5.17499	0.481314	2.55019	0.237022	19.4726	1.1492	0.119062	0.00187777
		S	15.9838	0.115776	271.613	0.124797	5.1482	0.0933854	176.314	0.025238	5659.76	0.0339198
Information on Analysis and Constants Used in Calculations									Results		40(a)/36(a)	± 2s	40(r)/39(k)	± 2s	Age	± 2s	MSWD	39Ar(k)	K/Ca	± 2s
															(Ma)			(%,n)
Sample = 050_VU120-O3C				Age Equations = Min et al. (2000)					Age Plateau				5.27373	0.0351953	2.59881	0.0226247	1.52093	76.9477	0.225924	0.0393635
Material = groundmass				Negative Intensities = Allowed										0.00667371		0.00870579	0.0522359	24
Location = CH18-12A - Christiana				Decay Constant 40K = 5.460 ± 0.053 E-10 1/a					Full External Error							0.0589187	1.58977	2σ Confidence Limit
Analyst = Klaudia Kuiper				Decay Constant 39Ar = 2.940 ± 0.016 E-07 1/h					Analytical Error							0.0173314	1.23326	Error Magnification
Project = VU120				Decay Constant 37Ar = 8.230 ± 0.012 E-04 1/h
Mass Discrimination Law = LIN				Decay Constant 36Cl = 2.257 ± 0.015 E-06 1/a					Total Fusion Age				5.15994	0.0687981	2.54278	0.0367466		38	0.27884	0.000770708
Irradiation = VU120				Decay Activity 40K(EC,β⁺) = 3.310 ± 0.030 1/gs										0.0133331		0.0144514
J = 0.00026925 ± 0.00000075				Decay Activity 40K(β⁻) = 27.890 ± 0.150 1/gs					Full External Error							0.0646813
FCs = 28.201 ± 0.023 Ma				Atmospheric Ratio 40/36(a) = 298.56 ± 0.31					Analytical Error							0.0338796
IGSN = Undefined				Atmospheric Ratio 38/36(a) = 0.1885 ± 0.0003
Preferred Age = Undefined				Production Ratio 39/37(ca) = 0.000673 ± 0.000004					Normal Isochron Error Chron		297.746	2.45676	5.28301	0.049906	2.60338	0.0285691	1.60353	76.9477
Classification = Undefined				Production Ratio 36/37(ca) = 0.000264 ± 0.000002								0.00825121		0.00944651		0.0109738	0.0362329	24
Experiment Type = Undefined				Production Ratio 40/39(k) = 0.000860 ± 0.000070					Full External Error							0.0615317	1.60302	2σ Confidence Limit
Extraction Method = Undefined				Production Ratio 38/39(k) = 0.012110 ± 0.000030					Analytical Error							0.0245754	1.26631	Error Magnification
Heating = 180 sec				Production Ratio 36/38(cl) = 262.80 ± 1.71												23		Number of Iterations
Isolation = 5.00 min				Scaling Ratio K/Ca = 0.430												5.22831e-05		Convergence
Instrument = HELIX				Abundance Ratio 40K/K = 1.1700 ± 0.0100 E-04
Lithology = Undefined				Atomic Weight K = 39.0983 ± 0.0001 g					Inverse Isochron		297.833	2.43255	5.28459	0.0493973	2.60416	0.0283561	1.56737	76.9477
Lat-Lon = Undefined - Undefined												0.00816751		0.00934742		0.0108888	0.0438474	24
Feature = Undefined									Full External Error							0.0614475	1.60302	2σ Confidence Limit
									Analytical Error							0.0243249	1.25195	Error Magnification
																1		Number of Iterations
																0.000278128		Convergence
																0.63409		Spreading Factor
[truncated: 15 more columns]

## Sheet: VU120-O4
Relative Abundances			36Ar [A]	%1s	37Ar [A]	%1s	38Ar [A]	%1s	39Ar [A]	%1s	40Ar [A]	%1s	40(r)/39(k)	± 2s	Age	± 2s	40Ar(r)	39Ar(k)	K/Ca	± 2s		Relative Abundances			36Ar [A]	%1s	37Ar [A]	%1s	38Ar [A]	%1s	39Ar [A]	%1s	40Ar [A]	%1s	40(r)/39(k)	± 2s	Age	± 2s	40Ar(r)	39Ar(k)	K/Ca	± 2s		Relative Abundances			36Ar [A]	%1s	37Ar [A]
															(Ka)		(%)	(%)																			(Ka)		(%)	(%)
195_VU120-O4A	5		0.000297919	355.141	-0.01068	113.704	-0.000235242	198.28	0.000153935	269.913	-0.0345239	303.093	-771.537	5736	-426522	3.57091e+06	360.076	0.000484846	-0.00648719	0.0365713		161_VU120-O4B	10		0.0238666	2.63453	0.0162499	99.4977	0.00465872	10.0441	0.0369833	1.57521	6.6673	3.53255	-12.3623	16.3023	-6106.44	8066.08	-6.85529	0.0859041	0.978348	1.94711		070_VU120-O4C	10		0.0174356	4.41986	0.00351297
196_VU120-O4A	7.5		0.00264302	40.7423	-0.0164457	60.149	0.000201879	235.676	0.00110351	38.0882	1.02366	10.2107	209.286	626.83	100402	292612	22.7873	0.00335394	-0.0291424	0.0413794		162_VU120-O4B	18	4	0.139918	0.639956	0.828784	1.8819	0.0634003	0.787069	1.77995	0.155986	42.0359	0.560949	0.183916	0.403622	90.6931	199.03	0.778521	4.13436	0.923204	0.0348668		071_VU120-O4C	18	4	0.107071	0.803417	1.26995
198_VU120-O4A	10		0.0307111	3.46329	0.0495407	19.1765	0.00768184	6.1612	0.0911568	0.689076	9.14444	1.13793	-0.227991	7.33738	-112.434	3618.54	-0.227191	0.274206	0.790927	0.30354		164_VU120-O4B	23	4	0.0599815	1.36451	1.35194	1.25862	0.060868	0.587525	2.46721	0.120984	17.9953	1.30602	0.0784572	0.275348	38.6895	135.781	1.07527	5.73037	0.784435	0.0198372		073_VU120-O4C	23	4	0.0344349	2.20415	1.64423
199_VU120-O4A	15	4	0.0740048	1.6503	0.552252	2.98042	0.0375939	1.37172	1.21873	0.123101	23.1	0.482279	0.860499	0.627014	424.292	309.13	4.53851	3.66624	0.948651	0.0565958		165_VU120-O4B	26	4	0.0402012	1.8496	1.75356	1.41767	0.06311	0.59705	2.69261	0.143082	12.524	1.87994	0.245041	0.240648	120.834	118.664	5.26597	6.25345	0.659979	0.0188078		074_VU120-O4C	26	4	0.0229339	3.70783	2.09749
201_VU120-O4A	18	4	0.0367167	2.83022	0.862008	2.22214	0.0385723	1.19238	1.5377	0.149489	11.6465	0.898472	0.48931	0.426284	241.279	210.187	6.45797	4.62546	0.766771	0.0341545		167_VU120-O4B	30	4	0.0440487	1.19828	2.4456	1.0975	0.0806032	0.627291	3.43582	0.132045	13.6822	1.73309	0.210713	0.166005	103.907	81.8579	5.28882	7.9792	0.603818	0.0133494		076_VU120-O4C	30	4	0.0207113	3.8194	2.85759
202_VU120-O4A	21	4	0.0392732	2.56763	1.16845	1.31488	0.0429277	1.30995	1.82626	0.150576	11.9003	0.879666	0.146033	0.349475	72.0123	172.331	2.2401	5.49315	0.67179	0.017782		168_VU120-O4B	10	4	0.031813	2.03379	4.34248	0.867171	0.113272	0.794925	5.25116	0.110139	10.7704	2.18004	0.307555	0.115934	151.659	57.1664	14.9866	12.1941	0.51969	0.0090857		077_VU120-O4C	10	4	0.0200463	3.58087	4.2018
204_VU120-O4A	25	4	0.0657848	1.80437	1.90695	0.794625	0.0637299	0.837925	2.54385	0.133351	20.0861	0.518413	0.234119	0.290991	115.449	143.489	2.96356	7.65102	0.573325	0.00923911		170_VU120-O4B	11.5	4	0.03213	1.3388	6.20949	0.742959	0.14265	0.414213	6.72649	0.116946	11.1521	2.10914	0.30467	0.0797974	150.237	39.3476	18.3651	15.6191	0.465512	0.00700241		079_VU120-O4C	11.5	4	0.0219603	3.44499	5.46026
205_VU120-O4A	30	4	0.21863	0.688246	2.88879	0.729171	0.109056	0.587048	3.5088	0.0992319	66.8847	0.159913	0.523905	0.266188	258.337	131.248	2.7469	10.5527	0.522	0.0076828		171_VU120-O4B	14	4	0.0398944	1.48595	6.31675	0.839547	0.143745	0.503826	6.64792	0.114865	13.3535	1.75842	0.292	0.0886072	143.99	43.6918	14.5276	15.4364	0.452254	0.00766462		080_VU120-O4C	14	4	0.0174711	4.29128	5.307
207_VU120-O4A	10	4	0.251839	0.621209	3.65653	0.855677	0.128019	0.460875	3.99219	0.116513	75.9197	0.141809	0.255181	0.243439	125.834	120.04	1.34103	12.0058	0.469184	0.00810359		173_VU120-O4B	17	4	0.064548	1.00741	6.37483	0.748859	0.149577	0.526775	6.89342	0.124716	20.4982	1.15284	0.250865	0.088982	123.706	43.8771	8.4312	16.0067	0.464691	0.00705574		082_VU120-O4C	17	4	0.00941305	8.31034	4.65278
208_VU120-O4A	12	4	0.764014	0.390927	3.97295	0.661526	0.229097	0.396702	4.3151	0.122039	230.838	0.0580409	0.706459	0.432396	348.346	213.189	1.31978	12.9768	0.466743	0.00627959		174_VU120-O4B	21	4	0.124592	0.753212	6.36979	0.733604	0.166887	0.468481	7.13175	0.108089	38.9935	0.604972	0.322187	0.103344	158.875	50.9579	5.88913	16.5605	0.481147	0.00713574		083_VU120-O4C	21	4	0.00928404	8.29403	3.45486
210_VU120-O4A	15	4	1.21222	0.330853	4.84693	0.700668	0.338692	0.299165	5.75474	0.0877876	367.641	0.0420136	1.06055	0.439734	522.921	216.786	1.65916	17.3072	0.510248	0.00720626
211_VU120-O4A	21	4	1.64297	0.33459	7.11399	0.649788	0.480104	0.268519	8.46015	0.0964748	495.966	0.0376464	0.7096	0.408891	349.894	201.6	1.20975	25.4436	0.511079	0.00671475
																								S	0.600993	0.370461	36.0095	0.316071	0.988771	0.199982	43.0633	0.0427782	187.672	0.396979												S	0.280762	0.880648	30.9495
		S	4.33911	0.190525	26.9913	0.30647	1.47544	0.166285	33.2499	0.0404596	1314.12	0.0320661
																						Information on Analysis and Constants Used in Calculations									Results		40(a)/36(a)	± 2s	40(r)/39(k)	± 2s	Age	± 2s	MSWD	39Ar(k)	K/Ca	± 2s		Information on Analysis and Constants Used in Calculations
																																					(Ka)			(%,n)
Information on Analysis and Constants Used in Calculations									Results		40(a)/36(a)	± 2s	40(r)/39(k)	± 2s	Age	± 2s	MSWD	39Ar(k)	K/Ca	± 2s
															(Ka)			(%,n)				Sample = 161_VU120-O4B				Age Equations = Min et al. (2000)					Age Plateau				0.282083	0.0391742	139.099	19.3324	0.614587	99.9141	0.497513	0.0537949		Sample = 070_VU120-O4C				Age Equations = Min et al. (2000)
																						Material = groundmass				Negative Intensities = Allowed										0.138875		0.138982	0.766442	9				Material = groundmass				Negative Intensities = Allowed
Sample = 195_VU120-O4A				Age Equations = Min et al. (2000)					Age Plateau Error Mean				0.45079	0.184534	222.287	90.9977	2.57211	99.722	0.511079	0.0373859		Location = CH18-14A - Christiana				Decay Constant 40K = 5.460 ± 0.053 E-10 1/a					Full External Error							19.5506	2	2σ Confidence Limit				Location = CH18-14A - Christiana				Decay Constant 40K = 5.460 ± 0.053 E-10 1/a
Material = groundmass				Negative Intensities = Allowed										0.409358		0.409371	0.00836063	9				Analyst = Klaudia Kuiper				Decay Constant 39Ar = 2.940 ± 0.016 E-07 1/h					Analytical Error							19.3167	1	Error Magnification				Analyst = Klaudia Kuiper				Decay Constant 39Ar = 2.940 ± 0.016 E-07 1/h
Location = CH18-14A - Christiana				Decay Constant 40K = 5.460 ± 0.053 E-10 1/a					Full External Error							91.1167	2	2σ Confidence Limit				Project = VU120				Decay Constant 37Ar = 8.230 ± 0.012 E-04 1/h																		Project = VU120				Decay Constant 37Ar = 8.230 ± 0.012 E-04 1/h
Analyst = Klaudia Kuiper				Decay Constant 39Ar = 2.940 ± 0.016 E-07 1/h					Analytical Error							90.9891	1.60378	Error Magnification				Mass Discrimination Law = LIN				Decay Constant 36Cl = 2.257 ± 0.015 E-06 1/a					Total Fusion Age				0.257292	0.0465122	126.875	22.9462		10	0.513943	0.0032785		Mass Discrimination Law = LIN				Decay Constant 36Cl = 2.257 ± 0.015 E-06 1/a
Project = VU120				Decay Constant 37Ar = 8.230 ± 0.012 E-04 1/h																		Irradiation = VU120				Decay Activity 40K(EC,β⁺) = 3.310 ± 0.030 1/gs										0.180776		0.180856						Irradiation = VU120				Decay Activity 40K(EC,β⁺) = 3.310 ± 0.030 1/gs
Mass Discrimination Law = LIN				Decay Constant 36Cl = 2.257 ± 0.015 E-06 1/a					Total Fusion Age				0.624467	0.156233	307.92	77.0499		12	0.529418	0.00327321		J = 0.00026925 ± 0.00000075				Decay Activity 40K(β⁻) = 27.890 ± 0.150 1/gs					Full External Error							23.0995						J = 0.00026925 ± 0.00000075				Decay Activity 40K(β⁻) = 27.890 ± 0.150 1/gs
Irradiation = VU120				Decay Activity 40K(EC,β⁺) = 3.310 ± 0.030 1/gs										0.250185		0.250227						FCs = 28.201 ± 0.023 Ma				Atmospheric Ratio 40/36(a) = 298.56 ± 0.31					Analytical Error							22.9352						FCs = 28.201 ± 0.023 Ma				Atmospheric Ratio 40/36(a) = 298.56 ± 0.31
J = 0.00026925 ± 0.00000075				Decay Activity 40K(β⁻) = 27.890 ± 0.150 1/gs					Full External Error							77.3194						IGSN = Undefined				Atmospheric Ratio 38/36(a) = 0.1885 ± 0.0003																		IGSN = Undefined				Atmospheric Ratio 38/36(a) = 0.1885 ± 0.0003
FCs = 28.201 ± 0.023 Ma				Atmospheric Ratio 40/36(a) = 298.56 ± 0.31					Analytical Error							77.0306						Preferred Age = Undefined				Production Ratio 39/37(ca) = 0.000673 ± 0.000004					Normal Isochron		296.548	4.66509	0.30068	0.0589982	148.27	29.1035	0.609351	99.9141				Preferred Age = Undefined				Production Ratio 39/37(ca) = 0.000673 ± 0.000004
IGSN = Undefined				Atmospheric Ratio 38/36(a) = 0.1885 ± 0.0003																		Classification = Undefined				Production Ratio 36/37(ca) = 0.000264 ± 0.000002								0.0157313		0.196216		0.196288	0.748744	9				Classification = Undefined				Production Ratio 36/37(ca) = 0.000264 ± 0.000002
Preferred Age = Undefined				Production Ratio 39/37(ca) = 0.000673 ± 0.000004					Normal Isochron		301.91	1.78013	0.184491	0.183285	90.9764	90.3813	1.01449	99.722				Experiment Type = Undefined				Production Ratio 40/39(k) = 0.000860 ± 0.000070					Full External Error							29.2687	2.06904	2σ Confidence Limit				Experiment Type = Undefined				Production Ratio 40/39(k) = 0.000860 ± 0.000070
Classification = Undefined				Production Ratio 36/37(ca) = 0.000264 ± 0.000002								0.00589624		0.993467		0.993458	0.418396	9				Extraction Method = Undefined				Production Ratio 38/39(k) = 0.012110 ± 0.000030					Analytical Error							29.0917	1	Error Magnification				Extraction Method = Undefined				Production Ratio 38/39(k) = 0.012110 ± 0.000030
Experiment Type = Undefined				Production Ratio 40/39(k) = 0.000860 ± 0.000070					Full External Error							90.4013	2.06904	2σ Confidence Limit				Heating = 180 sec				Production Ratio 36/38(cl) = 262.80 ± 1.71												5		Number of Iterations				Heating = 180 sec				Production Ratio 36/38(cl) = 262.80 ± 1.71
Extraction Method = Undefined				Production Ratio 38/39(k) = 0.012110 ± 0.000030					Analytical Error							90.3798	1.00722	Error Magnification				Isolation = 5.00 min				Scaling Ratio K/Ca = 0.430												1.50854e-07		Convergence				Isolation = 5.00 min				Scaling Ratio K/Ca = 0.430
Heating = 180 sec				Production Ratio 36/38(cl) = 262.80 ± 1.71												3		Number of Iterations				Instrument = HELIX				Abundance Ratio 40K/K = 1.1700 ± 0.0100 E-04																		Instrument = HELIX				Abundance Ratio 40K/K = 1.1700 ± 0.0100 E-04
Isolation = 5.00 min				Scaling Ratio K/Ca = 0.430												5.83607e-07		Convergence				Lithology = Undefined				Atomic Weight K = 39.0983 ± 0.0001 g					Inverse Isochron		296.63	4.65848	0.30095	0.05765	148.403	28.439	0.597469	99.9141				Lithology = Undefined				Atomic Weight K = 39.0983 ± 0.0001 g
Instrument = HELIX				Abundance Ratio 40K/K = 1.1700 ± 0.0100 E-04																		Lat-Lon = Undefined - Undefined												0.0157047		0.19156		0.191634	0.758559	9				Lat-Lon = Undefined - Undefined
Lithology = Undefined				Atomic Weight K = 39.0983 ± 0.0001 g					Inverse Isochron Clustered Points		301.877	1.79942	0.191788	0.113912	94.575	56.1737	1.03604	99.722				Feature = Undefined									Full External Error							28.6084	2.06904	2σ Confidence Limit				Feature = Undefined
Lat-Lon = Undefined - Undefined												0.00596078		0.593948		0.593959	0.403093	9													Analytical Error							28.4269	1	Error Magnification
Feature = Undefined									Full External Error							56.2086	2.06904	2σ Confidence Limit																				5		Number of Iterations
									Analytical Error							56.1712	1.01786	Error Magnification																				0.003951		Convergence
																3		Number of Iterations																				0.168763		Spreading Factor
																0.00446024		Convergence
																0.0264232		Spreading Factor
Relative Abundances			36Ar [A]	%1s	37Ar [A]	%1s	38Ar [A]	%1s	39Ar [A]	%1s	40Ar [A]	%1s	40(r)/39(k)	± 2s	Age	± 2s	40Ar(r)	39Ar(k)	K/Ca	± 2s
															(Ka)		(%)	(%)
070_VU120-O4C	10		0.0174356	4.41986	0.00351297	422.848	0.0040231	8.92966	0.0720918	0.655959	5.05333	1.27691	-2.10868	6.63126	-1040.16	3271.96	-3.00818	0.0633426	8.824	74.6243
071_VU120-O4C	18	4	0.107071	0.803417	1.26995	1.30365	0.0748385	1.02615	2.637	0.0938676	33.0833	0.202611	0.461344	0.202948	227.49	100.068	3.67608	2.31629	0.89259	0.0233328
073_VU120-O4C	23	4	0.0344349	2.20415	1.64423	1.17278	0.062574	1.03762	2.75515	0.13208	10.9769	0.604587	0.299728	0.171652	147.8	84.6405	7.52002	2.41989	0.720238	0.0170005
074_VU120-O4C	26	4	0.0229339	3.70783	2.09749	1.21708	0.0656774	0.873435	3.09708	0.104386	7.62314	0.956973	0.30397	0.170727	149.892	84.1844	12.3439	2.72006	0.634634	0.0155048
076_VU120-O4C	30	4	0.0207113	3.8194	2.85759	1.18078	0.075972	0.738478	3.64372	0.0860862	6.8355	1.02303	0.240753	0.135322	118.72	66.7276	12.8267	3.19993	0.548005	0.0129758
077_VU120-O4C	10	4	0.0200463	3.58087	4.2018	0.823226	0.0990548	0.665199	4.79109	0.101014	7.01116	0.998926	0.283371	0.0942205	139.734	46.4598	19.3528	4.20729	0.490018	0.00812849
079_VU120-O4C	11.5	4	0.0219603	3.44499	5.46026	0.740088	0.120834	0.614241	5.91558	0.0732014	7.52275	0.861949	0.23613	0.079541	116.44	39.2219	18.5567	5.1946	0.465568	0.0069249
080_VU120-O4C	14	4	0.0174711	4.29128	5.307	0.865771	0.117707	0.689386	5.69654	0.0955947	6.00802	1.09878	0.212492	0.0820211	104.784	40.4451	20.1349	5.00222	0.461273	0.00803574
082_VU120-O4C	17	4	0.00941305	8.31034	4.65278	0.868729	0.106931	0.621877	5.16646	0.0740874	3.70143	1.77771	0.24355	0.0940054	120.099	46.3542	33.9742	4.53685	0.477184	0.008321
083_VU120-O4C	21	4	0.00928404	8.29403	3.45486	1.12642	0.0781868	0.758565	3.78401	0.116774	3.27842	1.97532	0.205896	0.126339	101.532	62.2985	23.7503	3.32284	0.470677	0.0106605
161_VU120-O4B	10		0.0238666	2.63453	0.0162499	99.4977	0.00465872	10.0441	0.0369833	1.57521	6.6673	3.53255	-12.3623	16.3023	-6106.44	8066.08	-6.85529	0.0324864	0.978348	1.94711
162_VU120-O4B	18	4	0.139918	0.639956	0.828784	1.8819	0.0634003	0.787069	1.77995	0.155986	42.0359	0.560949	0.183916	0.403622	90.6931	199.03	0.778521	1.56349	0.923204	0.0348668
164_VU120-O4B	23	4	0.0599815	1.36451	1.35194	1.25862	0.060868	0.587525	2.46721	0.120984	17.9953	1.30602	0.0784572	0.275348	38.6895	135.781	1.07527	2.16705	0.784435	0.0198372
165_VU120-O4B	26	4	0.0402012	1.8496	1.75356	1.41767	0.06311	0.59705	2.69261	0.143082	12.524	1.87994	0.245041	0.240648	120.834	118.664	5.26597	2.36487	0.659979	0.0188078
167_VU120-O4B	30	4	0.0440487	1.19828	2.4456	1.0975	0.0806032	0.627291	3.43582	0.132045	13.6822	1.73309	0.210713	0.166005	103.907	81.8579	5.28882	3.01749	0.603818	0.0133494
168_VU120-O4B	10	4	0.031813	2.03379	4.34248	0.867171	0.113272	0.794925	5.25116	0.110139	10.7704	2.18004	0.307555	0.115934	151.659	57.1664	14.9866	4.61146	0.51969	0.0090857
170_VU120-O4B	11.5	4	0.03213	1.3388	6.20949	0.742959	0.14265	0.414213	6.72649	0.116946	11.1521	2.10914	0.30467	0.0797974	150.237	39.3476	18.3651	5.90667	0.465512	0.00700241
171_VU120-O4B	14	4	0.0398944	1.48595	6.31675	0.839547	0.143745	0.503826	6.64792	0.114865	13.3535	1.75842	0.292	0.0886072	143.99	43.6918	14.5276	5.83757	0.452254	0.00766462
173_VU120-O4B	17	4	0.064548	1.00741	6.37483	0.748859	0.149577	0.526775	6.89342	0.124716	20.4982	1.15284	0.250865	0.088982	123.706	43.8771	8.4312	6.05325	0.464691	0.00705574
174_VU120-O4B	21	4	0.124592	0.753212	6.36979	0.733604	0.166887	0.468481	7.13175	0.108089	38.9935	0.604972	0.322187	0.103344	158.875	50.9579	5.88913	6.26267	0.481147	0.00713574
195_VU120-O4A	5		0.000297919	355.141	-0.01068	113.704	-0.000235242	198.28	0.000153935	269.913	-0.0345239	303.093	-771.537	5736	-426522	3.57091e+06	360.076	0.000141574	-0.00648719	0.0365713
196_VU120-O4A	7.5		0.00264302	40.7423	-0.0164457	60.149	0.000201879	235.676	0.00110351	38.0882	1.02366	10.2107	209.286	626.83	100402	292612	22.7873	0.000979339	-0.0291424	0.0413794
198_VU120-O4A	10		0.0307111	3.46329	0.0495407	19.1765	0.00768184	6.1612	0.0911568	0.689076	9.14444	1.13793	-0.227991	7.33738	-112.434	3618.54	-0.227191	0.0800672	0.790927	0.30354
199_VU120-O4A	15	4	0.0740048	1.6503	0.552252	2.98042	0.0375939	1.37172	1.21873	0.123101	23.1	0.482279	0.860499	0.627014	424.292	309.13	4.53851	1.07053	0.948651	0.0565958
201_VU120-O4A	18	4	0.0367167	2.83022	0.862008	2.22214	0.0385723	1.19238	1.5377	0.149489	11.6465	0.898472	0.48931	0.426284	241.279	210.187	6.45797	1.35062	0.766771	0.0341545
202_VU120-O4A	21	4	0.0392732	2.56763	1.16845	1.31488	0.0429277	1.30995	1.82626	0.150576	11.9003	0.879666	0.146033	0.349475	72.0123	172.331	2.2401	1.60398	0.67179	0.017782
204_VU120-O4A	25	4	0.0657848	1.80437	1.90695	0.794625	0.0637299	0.837925	2.54385	0.133351	20.0861	0.518413	0.234119	0.290991	115.449	143.489	2.96356	2.23407	0.573325	0.00923911
205_VU120-O4A	30	4	0.21863	0.688246	2.88879	0.729171	0.109056	0.587048	3.5088	0.0992319	66.8847	0.159913	0.523905	0.266188	258.337	131.248	2.7469	3.08136	0.522	0.0076828
207_VU120-O4A	10	4	0.251839	0.621209	3.65653	0.855677	0.128019	0.460875	3.99219	0.116513	75.9197	0.141809	0.255181	0.243439	125.834	120.04	1.34103	3.50565	0.469184	0.00810359
208_VU120-O4A	12	4	0.764014	0.390927	3.97295	0.661526	0.229097	0.396702	4.3151	0.122039	230.838	0.0580409	0.706459	0.432396	348.346	213.189	1.31978	3.78919	0.466743	0.00627959
210_VU120-O4A	15		1.21222	0.330853	4.84693	0.700668	0.338692	0.299165	5.75474	0.0877876	367.641	0.0420136	1.06055	0.439734	522.921	216.786	1.65916	5.05363	0.510248	0.00720626
211_VU120-O4A	21		1.64297	0.33459	7.11399	0.649788	0.480104	0.268519	8.46015	0.0964748	495.966	0.0376464	0.7096	0.408891	349.894	201.6	1.20975	7.42945	0.511079	0.00671475
		S	5.22086	0.17069	93.9502	0.186017	3.27001	0.115039	113.872	0.022667	1592.88	0.0553699
Information on Analysis and Constants Used in Calculations									Results		40(a)/36(a)	± 2s	40(r)/39(k)	± 2s	Age	± 2s	MSWD	39Ar(k)	K/Ca	± 2s
															(Ka)			(%,n)
Sample = 070_VU120-O4C				Age Equations = Min et al. (2000)					Age Plateau				0.270432	0.0274312	133.354	13.5469	1.09733	87.3399	0.503217	0.0309156
Material = groundmass				Negative Intensities = Allowed										0.101435		0.101586	0.336345	25
Location = CH18-14A - Christiana				Decay Constant 40K = 5.460 ± 0.053 E-10 1/a					Full External Error							13.8318	1.57735	2σ Confidence Limit
Analyst = Klaudia Kuiper				Decay Constant 39Ar = 2.940 ± 0.016 E-07 1/h					Analytical Error							13.5263	1.04753	Error Magnification
Project = VU120				Decay Constant 37Ar = 8.230 ± 0.012 E-04 1/h
Mass Discrimination Law = LIN				Decay Constant 36Cl = 2.257 ± 0.015 E-06 1/a					Total Fusion Age				0.364927	0.0507273	179.949	25.0332		32	0.520891	0.00195224
Irradiation = VU120				Decay Activity 40K(EC,β⁺) = 3.310 ± 0.030 1/gs										0.139007		0.139113
J = 0.00026925 ± 0.00000075				Decay Activity 40K(β⁻) = 27.890 ± 0.150 1/gs					Full External Error							25.3153
FCs = 28.201 ± 0.023 Ma				Atmospheric Ratio 40/36(a) = 298.56 ± 0.31					Analytical Error							25.0129
IGSN = Undefined				Atmospheric Ratio 38/36(a) = 0.1885 ± 0.0003
Preferred Age = Undefined				Production Ratio 39/37(ca) = 0.000673 ± 0.000004					Normal Isochron		300.993	1.6802	0.245943	0.0303612	121.279	14.9865	0.796351	87.3399
Classification = Undefined				Production Ratio 36/37(ca) = 0.000264 ± 0.000002								0.0055822		0.123448		0.123571	0.740127	25
Experiment Type = Undefined				Production Ratio 40/39(k) = 0.000860 ± 0.000070					Full External Error							15.2003	1.58977	2σ Confidence Limit
Extraction Method = Undefined				Production Ratio 38/39(k) = 0.012110 ± 0.000030					Analytical Error							14.9711	1	Error Magnification
Heating = 180 sec				Production Ratio 36/38(cl) = 262.80 ± 1.71												6		Number of Iterations
Isolation = 5.00 min				Scaling Ratio K/Ca = 0.430												8.62773e-07		Convergence
Instrument = HELIX				Abundance Ratio 40K/K = 1.1700 ± 0.0100 E-04
Lithology = Undefined				Atomic Weight K = 39.0983 ± 0.0001 g					Inverse Isochron		301.008	1.68293	0.248671	0.0295449	122.624	14.5848	0.789218	87.3399
Lat-Lon = Undefined - Undefined												0.00559099		0.118811		0.118939	0.749192	25
Feature = Undefined									Full External Error							14.8092	1.58977	2σ Confidence Limit
									Analytical Error							14.5686	1	Error Magnification
																4		Number of Iterations
																0.00360345		Convergence
																0.342656		Spreading Factor
[truncated: 15 more columns]

## Sheet: VU120-O5
Relative Abundances			36Ar [A]	%1s	37Ar [A]	%1s	38Ar [A]	%1s	39Ar [A]	%1s	40Ar [A]	%1s	40(r)/39(k)	± 2s	Age	± 2s	40Ar(r)	39Ar(k)	K/Ca	± 2s		Relative Abundances			36Ar [A]	%1s	37Ar [A]	%1s	38Ar [A]	%1s	39Ar [A]	%1s	40Ar [A]	%1s	40(r)/39(k)	± 2s	Age	± 2s	40Ar(r)	39Ar(k)	K/Ca	± 2s		Relative Abundances			36Ar [A]	%1s	37Ar [A]
															(Ma)		(%)	(%)																			(Ma)		(%)	(%)
219_VU120-O5A	5		0.00232975	107.227	0.0274976	40.6075	0.00126327	76.6573	-0.00157524	34.0239	0.83659	80.5584	-89.8899	1262.91	-44.8734	638.242	17.1245	-0.00144158	-0.0249225	0.0262815		182_VU120-O5B	10		4.55454	0.389101	0.25905	8.18867	0.864278	0.221639	0.953926	0.156349	1352.12	0.0426179	-8.03499	11.548	-3.96589	5.70602	-0.566768	0.747205	1.58314	0.259324		091_VU120-O5C	10		3.22732	0.222523	0.214213
220_VU120-O5A	7.5		0.19136	1.46314	0.0139429	73.7291	0.0371081	2.63359	0.00387937	14.3441	57.8741	1.16497	191.959	558.591	92.295	261.915	1.28361	0.00350048	0.11935	0.179308		183_VU120-O5B	12.5	4	7.2656	0.390053	0.903844	3.10659	1.42372	0.226786	4.41313	0.123259	2205.34	0.0329539	8.20207	3.9827	4.03951	1.95931	1.6411	3.45694	2.09924	0.130532		092_VU120-O5C	12.5	4	6.6583	0.218325	0.884848
222_VU120-O5A	10		5.37449	0.293774	0.322635	3.58358	1.01973	0.194936	1.39285	0.188966	1610.54	0.0520161	4.27895	7.28161	2.10888	3.58667	0.369999	1.25966	1.85606	0.133212		185_VU120-O5B	15	4	8.10878	0.377969	2.8556	1.22403	1.6762	0.210982	12.4928	0.104926	2494.75	0.03604	5.92457	1.52643	2.91874	0.751398	2.96637	9.78586	1.8809	0.0462145		094_VU120-O5C	15	4	6.99536	0.216503	2.64928
223_VU120-O5A	15	4	12.6147	0.316725	3.4779	0.799368	2.58143	0.161805	14.9555	0.0766602	3857.04	0.0348967	6.08918	1.68891	3.00033	0.831497	2.36069	13.5255	1.84878	0.0296928		186_VU120-O5B	16	4	4.31505	0.388664	2.78717	1.17499	0.969146	0.256901	11.2081	0.106858	1345.37	0.0337781	5.11169	0.92868	2.51855	0.457249	4.25777	8.7794	1.72888	0.040796		095_VU120-O5C	16	4	3.95516	0.215649	2.99335
225_VU120-O5A	18	4	8.14643	0.292706	7.59508	0.648053	1.84142	0.195069	24.2307	0.0790089	2548.18	0.0401662	4.81134	0.629464	2.3711	0.310008	4.57417	21.9126	1.37155	0.0179084		188_VU120-O5B	17	4	4.24227	0.397725	4.40091	0.850196	0.98645	0.214561	14.3075	0.107096	1330.28	0.0406066	4.47685	0.731959	2.20595	0.360452	4.81397	11.2067	1.39765	0.0239534		097_VU120-O5C	17	4	2.90314	0.250325	3.21844
226_VU120-O5A	21	4	6.25131	0.28855	9.73274	0.633679	1.47652	0.22199	23.6017	0.0839845	1977.64	0.0456442	4.7468	0.491272	2.33932	0.241954	5.66338	21.3423	1.04245	0.0133272		189_VU120-O5B	18	4	3.401	0.378998	4.62287	0.809105	0.801712	0.222586	12.5752	0.0978411	1073.32	0.0428423	4.63472	0.639088	2.28369	0.314705	5.42878	9.84942	1.1694	0.0190613		098_VU120-O5C	18	4	2.41643	0.221871	3.60875
228_VU120-O5A	25	4	5.32978	0.292541	12.5158	0.611506	1.27226	0.209632	19.802	0.0783116	1694.71	0.0502283	5.27552	0.506591	2.59969	0.249463	6.16161	17.9037	0.680041	0.00838497		191_VU120-O5B	19	4	2.75405	0.438142	4.22542	0.858514	0.656812	0.283939	10.3598	0.131894	860.651	0.0632778	3.73939	0.722766	1.84275	0.355996	4.49993	8.11402	1.05398	0.0183095		100_VU120-O5C	19	4	1.95324	0.247551	3.40397
229_VU120-O5A	30	4	4.65017	0.311893	14.5045	0.584971	1.05843	0.217471	13.5857	0.0825129	1457.53	0.0553659	5.17865	0.682878	2.55199	0.336282	4.82358	12.2797	0.402473	0.00475538		192_VU120-O5B	20	4	2.33281	0.44596	4.1753	0.91682	0.553169	0.321641	8.4631	0.141491	725.736	0.431993	3.49565	1.05727	1.7227	0.520789	4.07507	6.62811	0.871298	0.0161657		101_VU120-O5C	20	4	1.80066	0.284397	3.54494
231_VU120-O5A	10	4	4.45341	0.379829	13.1274	0.673018	0.943982	0.255304	8.4591	0.101834	1372.18	0.0472553	5.15907	1.24873	2.54235	0.614937	3.1771	7.64345	0.276796	0.00376827		194_VU120-O5B	21	4	2.24128	0.410266	4.41273	0.934222	0.531241	0.273682	7.9653	0.109243	701.536	0.0541072	4.1096	0.717784	2.02509	0.353507	4.66434	6.23799	0.775892	0.014596		103_VU120-O5C	21	4	1.44365	0.243356	3.13466
232_VU120-O5A	12	4	4.3635	0.552293	12.8892	0.665038	0.904862	0.233056	4.57573	0.142294	1330.86	0.06913	6.37289	3.23143	3.13999	1.5908	2.18696	4.131	0.152362	0.00207258		195_VU120-O5B	22.3	4	2.08781	0.38861	4.80558	0.932007	0.492284	0.28201	7.00795	0.102627	656.244	0.0550286	4.75138	0.723398	2.34113	0.35621	5.07159	5.48776	0.626777	0.0117539		104_VU120-O5C	22.3	4	1.31324	0.35639	3.12943
																						197_VU120-O5B	23.6	4	1.96912	0.426422	4.72026	0.756386	0.446614	0.297545	5.91937	0.109074	615.356	0.0575504	4.70311	0.880529	2.31737	0.433589	4.52169	4.63497	0.538945	0.00823744		106_VU120-O5C	23.6	4	1.47406	0.271997	3.91449
																						198_VU120-O5B	25	4	2.00848	0.400083	4.93897	0.810714	0.44627	0.318876	5.51276	0.102599	624.249	0.0593617	4.53422	0.909863	2.2342	0.448054	4.00177	4.3163	0.479667	0.00783956		107_VU120-O5C	25	4	1.38887	0.275825	4.21617
		S	51.3775	0.124233	74.2067	0.254166	11.137	0.0749114	110.606	0.0335999	15907.4	0.0176996										200_VU120-O5B	27.5	4	2.61013	0.406914	7.73713	0.777641	0.578219	0.307978	6.23784	0.116321	807.407	0.0507226	4.61	1.05845	2.27152	0.521214	3.55861	4.88288	0.346386	0.00544732		109_VU120-O5C	27.5	4	1.42136	0.298013	4.87185
																						201_VU120-O5B	30	4	2.31783	0.392772	6.33339	0.701592	0.498805	0.251387	4.60359	0.116555	711.265	0.0561705	4.29417	1.23492	2.11599	0.608165	2.77678	3.60328	0.312267	0.00444185		110_VU120-O5C	30	4	1.38564	0.295445	5.04349
																						203_VU120-O5B	10	4	2.47798	0.465164	9.46578	0.718511	0.534387	0.280684	5.26015	0.110341	759.647	0.0548174	3.91429	1.3517	1.9289	0.665745	2.70716	4.11601	0.238662	0.00346994		112_VU120-O5C	10	4	1.85482	0.252456	6.61724
																						204_VU120-O5B	13	4	5.27096	0.381366	19.0988	0.678568	1.07529	0.23695	6.09894	0.102435	1593.21	0.0421077	3.45236	2.05598	1.70137	1.01274	1.31881	4.76807	0.137025	0.00188078		113_VU120-O5C	13		4.87107	0.215128	13.596
Information on Analysis and Constants Used in Calculations									Results		40(a)/36(a)	± 2s	40(r)/39(k)	± 2s	Age	± 2s	MSWD	39Ar(k)	K/Ca	± 2s		206_VU120-O5B	16	4	3.17321	0.376941	9.77034	0.650539	0.629255	0.256752	2.36762	0.121646	956.673	0.0493862	4.2555	3.16331	2.09694	1.55786	1.05025	1.84973	0.103911	0.00137554		115_VU120-O5C	16		2.12752	0.259147	5.80646
															(Ma)			(%,n)				207_VU120-O5B	21	4	3.22716	0.374143	8.38726	0.677126	0.633068	0.273559	1.96543	0.132564	974.08	0.0448023	5.73441	3.84407	2.82513	1.89237	1.15372	1.53537	0.100475	0.00138667		116_VU120-O5C	21		1.67445	0.252901	4.81138
Sample = 219_VU120-O5A				Age Equations = Min et al. (2000)					Age Plateau				5.03963	0.269231	2.48353	0.133313	0.873761	98.7383	0.254814	0.170895
Material = groundmass				Negative Intensities = Allowed										0.0534227		0.053679	0.5131	7						S	64.3581	0.102474	103.9	0.215164	13.7969	0.0623642	127.713	0.029648	19787.2	0.0191815												S	48.8643	0.0639324	75.659
Location = CH18-15 - Christiana				Decay Constant 40K = 5.460 ± 0.053 E-10 1/a					Full External Error							0.143092	2.1547	2σ Confidence Limit
Analyst = Klaudia Kuiper				Decay Constant 39Ar = 2.940 ± 0.016 E-07 1/h					Analytical Error							0.132587	1	Error Magnification
Project = VU120				Decay Constant 37Ar = 8.230 ± 0.012 E-04 1/h
Mass Discrimination Law = LIN				Decay Constant 36Cl = 2.257 ± 0.015 E-06 1/a					Total Fusion Age				5.19091	0.365391	2.55803	0.180504		10	0.640629	0.00328489		Information on Analysis and Constants Used in Calculations									Results		40(a)/36(a)	± 2s	40(r)/39(k)	± 2s	Age	± 2s	MSWD	39Ar(k)	K/Ca	± 2s		Information on Analysis and Constants Used in Calculations
Irradiation = VU120				Decay Activity 40K(EC,β⁺) = 3.310 ± 0.030 1/gs										0.0703906		0.0705637																					(Ma)			(%,n)
J = 0.00026925 ± 0.00000075				Decay Activity 40K(β⁻) = 27.890 ± 0.150 1/gs					Full External Error							0.188279
FCs = 28.201 ± 0.023 Ma				Atmospheric Ratio 40/36(a) = 298.56 ± 0.31					Analytical Error							0.179935						Sample = 182_VU120-O5B				Age Equations = Min et al. (2000)					Age Plateau				4.44133	0.272363	2.18846	0.134684	1.30744	99.2528	0.148854	0.0650916		Sample = 091_VU120-O5C				Age Equations = Min et al. (2000)
IGSN = Undefined				Atmospheric Ratio 38/36(a) = 0.1885 ± 0.0003																		Material = groundmass				Negative Intensities = Allowed										0.0613245		0.0615429	0.181644	17				Material = groundmass				Negative Intensities = Allowed
Preferred Age = Undefined				Production Ratio 39/37(ca) = 0.000673 ± 0.000004					Normal Isochron		300.223	2.23237	4.50073	0.762594	2.21812	0.375811	0.712054	98.7383				Location = CH18-15 - Christiana				Decay Constant 40K = 5.460 ± 0.053 E-10 1/a					Full External Error							0.142263	1.70711	2σ Confidence Limit				Location = CH18-14A - Christiana				Decay Constant 40K = 5.460 ± 0.053 E-10 1/a
Classification = Undefined				Production Ratio 36/37(ca) = 0.000264 ± 0.000002								0.00743572		0.169438		0.169428	0.614289	7				Analyst = Klaudia Kuiper				Decay Constant 39Ar = 2.940 ± 0.016 E-07 1/h					Analytical Error							0.134126	1.14343	Error Magnification				Analyst = Klaudia Kuiper				Decay Constant 39Ar = 2.940 ± 0.016 E-07 1/h
Experiment Type = Undefined				Production Ratio 40/39(k) = 0.000860 ± 0.000070					Full External Error							0.378669	2.26491	2σ Confidence Limit				Project = VU120				Decay Constant 37Ar = 8.230 ± 0.012 E-04 1/h																		Project = VU120				Decay Constant 37Ar = 8.230 ± 0.012 E-04 1/h
Extraction Method = Undefined				Production Ratio 38/39(k) = 0.012110 ± 0.000030					Analytical Error							0.375606	1	Error Magnification				Mass Discrimination Law = LIN				Decay Constant 36Cl = 2.257 ± 0.015 E-06 1/a					Total Fusion Age				4.54847	0.324738	2.24122	0.160405		18	0.528259	0.00229475		Mass Discrimination Law = LIN				Decay Constant 36Cl = 2.257 ± 0.015 E-06 1/a
Heating = 180 sec				Production Ratio 36/38(cl) = 262.80 ± 1.71												3		Number of Iterations				Irradiation = VU120				Decay Activity 40K(EC,β⁺) = 3.310 ± 0.030 1/gs										0.0713949		0.0715704						Irradiation = VU120				Decay Activity 40K(EC,β⁺) = 3.310 ± 0.030 1/gs
Isolation = 5.00 min				Scaling Ratio K/Ca = 0.430												2.14224e-05		Convergence				J = 0.00026920 ± 0.00000075				Decay Activity 40K(β⁻) = 27.890 ± 0.150 1/gs					Full External Error							0.167126						J = 0.00026920 ± 0.00000075				Decay Activity 40K(β⁻) = 27.890 ± 0.150 1/gs
Instrument = HELIX				Abundance Ratio 40K/K = 1.1700 ± 0.0100 E-04																		FCs = 28.201 ± 0.023 Ma				Atmospheric Ratio 40/36(a) = 298.56 ± 0.31					Analytical Error							0.159914						FCs = 28.201 ± 0.023 Ma				Atmospheric Ratio 40/36(a) = 298.56 ± 0.31
Lithology = Undefined				Atomic Weight K = 39.0983 ± 0.0001 g					Inverse Isochron Clustered Points		300.218	2.23142	4.50415	0.751896	2.2198	0.370544	0.713623	98.7383				IGSN = Undefined				Atmospheric Ratio 38/36(a) = 0.1885 ± 0.0003																		IGSN = Undefined				Atmospheric Ratio 38/36(a) = 0.1885 ± 0.0003
Lat-Lon = Undefined - Undefined												0.00743265		0.166934		0.166927	0.613107	7				Preferred Age = Undefined				Production Ratio 39/37(ca) = 0.000673 ± 0.000004					Normal Isochron		299.768	1.53976	4.01406	0.601388	1.97803	0.296397	1.26854	99.2528				Preferred Age = Undefined				Production Ratio 39/37(ca) = 0.000673 ± 0.000004
Feature = Undefined									Full External Error							0.373447	2.26491	2σ Confidence Limit				Classification = Undefined				Production Ratio 36/37(ca) = 0.000264 ± 0.000002								0.00513649		0.149821		0.149844	0.21246	17				Classification = Undefined				Production Ratio 36/37(ca) = 0.000264 ± 0.000002
									Analytical Error							0.370336	1	Error Magnification				Experiment Type = Undefined				Production Ratio 40/39(k) = 0.000860 ± 0.000070					Full External Error							0.299276	1.7303	2σ Confidence Limit				Experiment Type = Undefined				Production Ratio 40/39(k) = 0.000860 ± 0.000070
																2		Number of Iterations				Extraction Method = Undefined				Production Ratio 38/39(k) = 0.012110 ± 0.000030					Analytical Error							0.29619	1.1263	Error Magnification				Extraction Method = Undefined				Production Ratio 38/39(k) = 0.012110 ± 0.000030
																0.000660609		Convergence				Heating = 180 sec				Production Ratio 36/38(cl) = 262.80 ± 1.71												4		Number of Iterations				Heating = 180 sec				Production Ratio 36/38(cl) = 262.80 ± 1.71
																0.0382829		Spreading Factor				Isolation = 5.00 min				Scaling Ratio K/Ca = 0.430												2.26053e-06		Convergence				Isolation = 5.00 min				Scaling Ratio K/Ca = 0.430
																						Instrument = HELIX				Abundance Ratio 40K/K = 1.1700 ± 0.0100 E-04																		Instrument = HELIX				Abundance Ratio 40K/K = 1.1700 ± 0.0100 E-04
																						Lithology = Undefined				Atomic Weight K = 39.0983 ± 0.0001 g					Inverse Isochron Clustered Points		299.78	1.5377	4.01634	0.575707	1.97916	0.283758	1.26366	99.2528				Lithology = Undefined				Atomic Weight K = 39.0983 ± 0.0001 g
																						Lat-Lon = Undefined - Undefined												0.00512944		0.143341		0.143373	0.215787	17				Lat-Lon = Undefined - Undefined
																						Feature = Undefined									Full External Error							0.286767	1.7303	2σ Confidence Limit				Feature = Undefined
																															Analytical Error							0.283541	1.12413	Error Magnification
																																						3		Number of Iterations
																																						3.33166e-06		Convergence
																																						0.0402971		Spreading Factor
Relative Abundances			36Ar [A]	%1s	37Ar [A]	%1s	38Ar [A]	%1s	39Ar [A]	%1s	40Ar [A]	%1s	40(r)/39(k)	± 2s	Age	± 2s	40Ar(r)	39Ar(k)	K/Ca	± 2s
															(Ma)		(%)	(%)
091_VU120-O5C	10		3.22732	0.222523	0.214213	9.95319	0.610755	0.226502	0.825227	0.301324	967.921	0.0351574	5.31937	5.79602	2.6208	2.8536	0.453438	0.246986	1.65623	0.329846
092_VU120-O5C	12.5	4	6.6583	0.218325	0.884848	2.62188	1.29725	0.164879	3.76852	0.0903826	2004.59	0.0321078	4.44712	2.57449	2.19131	1.26781	0.835901	1.12792	1.83106	0.0960733
094_VU120-O5C	15	4	6.99536	0.216503	2.64928	1.37114	1.44465	0.200427	10.6106	0.0638475	2136.67	0.0313514	4.5563	0.954097	2.24507	0.469834	2.26225	3.17571	1.7219	0.0472704
095_VU120-O5C	16	4	3.95516	0.215649	2.99335	1.07942	0.886833	0.200499	10.753	0.0767285	1231.04	0.0340247	4.68969	0.531707	2.31076	0.261823	4.09561	3.21828	1.5444	0.0334253
097_VU120-O5C	17	4	2.90314	0.250325	3.21844	1.1299	0.691134	0.285562	10.1611	0.0669267	914.745	0.0510654	4.74756	0.471629	2.33926	0.232236	5.27255	3.04106	1.35729	0.030726
098_VU120-O5C	18	4	2.41643	0.221871	3.60875	1.02692	0.580786	0.259075	9.35314	0.0808845	769.106	0.0441173	5.12613	0.385079	2.52566	0.189599	6.2323	2.79911	1.11418	0.0229545
100_VU120-O5C	19	4	1.95324	0.247551	3.40397	0.985505	0.464937	0.318224	7.55786	0.0923414	618.121	0.0486688	4.66206	0.422127	2.29715	0.207866	5.69865	2.26174	0.954443	0.0188946
101_VU120-O5C	20	4	1.80066	0.284397	3.54494	1.06963	0.429196	0.291961	6.94712	0.0885341	573.02	0.0522829	5.13895	0.476763	2.53197	0.23474	6.22818	2.07889	0.842394	0.0180827
103_VU120-O5C	21	4	1.44365	0.243356	3.13466	1.19072	0.344764	0.324143	5.39184	0.0680352	457.501	0.0590461	4.95898	0.435003	2.44336	0.214189	5.84207	1.6134	0.739341	0.0176356
104_VU120-O5C	22.3	4	1.31324	0.35639	3.12943	0.979131	0.306329	0.318658	4.66007	0.113946	419.155	0.0672401	5.8648	0.63672	2.88931	0.313435	6.5174	1.39435	0.640029	0.0126181
106_VU120-O5C	23.6	4	1.47406	0.271997	3.91449	0.818498	0.343219	0.327721	4.89925	0.0842725	465.469	0.058807	5.24422	0.535284	2.5838	0.263546	5.51678	1.46579	0.537884	0.00885174
107_VU120-O5C	25	4	1.38887	0.275825	4.21617	1.01189	0.318129	0.270388	4.23043	0.0906049	438.596	0.0616445	5.73922	0.592284	2.82749	0.29157	5.53199	1.26552	0.431165	0.0087608
109_VU120-O5C	27.5	4	1.42136	0.298013	4.87185	0.786452	0.317574	0.24808	3.7941	0.115692	445.091	0.110502	5.56878	0.752864	2.74359	0.370638	4.7429	1.13477	0.334586	0.00531946
110_VU120-O5C	30	4	1.38564	0.295445	5.04349	0.802624	0.300607	0.33386	3.10073	0.109573	429.715	0.113722	5.2996	0.894215	2.61107	0.440258	3.81988	0.927177	0.264074	0.00427845
112_VU120-O5C	10	4	1.85482	0.252456	6.61724	0.915166	0.392418	0.231885	3.18126	0.0668197	570.335	0.0883407	5.37653	1.00328	2.64894	0.493944	2.99476	0.950966	0.206434	0.00378852
113_VU120-O5C	13		4.87107	0.215128	13.596	0.673019	0.976383	0.189201	3.96527	0.105336	1485.07	0.0442895	8.04682	1.78783	3.96313	0.879569	2.14361	1.18425	0.125119	0.00170476
115_VU120-O5C	16		2.12752	0.259147	5.80646	0.735441	0.418385	0.364068	1.48468	0.145598	649.593	0.0786983	10.0328	2.49311	4.93994	1.2259	2.28701	0.443263	0.109659	0.00164443
116_VU120-O5C	21		1.67445	0.252901	4.81138	0.753075	0.332913	0.343011	1.24935	0.198792	514.553	0.0967014	12.0429	2.33519	5.92804	1.14763	2.91646	0.373019	0.111367	0.0017351
182_VU120-O5B	10		4.55454	0.389101	0.25905	8.18867	0.864278	0.221639	0.953926	0.156349	1352.12	0.0426179	-8.03499	11.548	-3.96589	5.70602	-0.566768	0.285503	1.58314	0.259324
183_VU120-O5B	12.5		7.2656	0.390053	0.903844	3.10659	1.42372	0.226786	4.41313	0.123259	2205.34	0.0329539	8.20207	3.9827	4.03951	1.95931	1.6411	1.32088	2.09924	0.130532
185_VU120-O5B	15	4	8.10878	0.377969	2.8556	1.22403	1.6762	0.210982	12.4928	0.104926	2494.75	0.03604	5.92457	1.52643	2.91874	0.751398	2.96637	3.73912	1.8809	0.0462145
186_VU120-O5B	16	4	4.31505	0.388664	2.78717	1.17499	0.969146	0.256901	11.2081	0.106858	1345.37	0.0337781	5.11169	0.92868	2.51855	0.457249	4.25777	3.35456	1.72888	0.040796
188_VU120-O5B	17	4	4.24227	0.397725	4.40091	0.850196	0.98645	0.214561	14.3075	0.107096	1330.28	0.0406066	4.47685	0.731959	2.20595	0.360452	4.81397	4.28201	1.39765	0.0239534
189_VU120-O5B	18	4	3.401	0.378998	4.62287	0.809105	0.801712	0.222586	12.5752	0.0978411	1073.32	0.0428423	4.63472	0.639088	2.28369	0.314705	5.42878	3.76341	1.1694	0.0190613
191_VU120-O5B	19	4	2.75405	0.438142	4.22542	0.858514	0.656812	0.283939	10.3598	0.131894	860.651	0.0632778	3.73939	0.722766	1.84275	0.355996	4.49993	3.10032	1.05398	0.0183095
192_VU120-O5B	20	4	2.33281	0.44596	4.1753	0.91682	0.553169	0.321641	8.4631	0.141491	725.736	0.431993	3.49565	1.05727	1.7227	0.520789	4.07507	2.53256	0.871298	0.0161657
194_VU120-O5B	21	4	2.24128	0.410266	4.41273	0.934222	0.531241	0.273682	7.9653	0.109243	701.536	0.0541072	4.1096	0.717784	2.02509	0.353507	4.66434	2.3835	0.775892	0.014596
195_VU120-O5B	22.3	4	2.08781	0.38861	4.80558	0.932007	0.492284	0.28201	7.00795	0.102627	656.244	0.0550286	4.75138	0.723398	2.34113	0.35621	5.07159	2.09684	0.626777	0.0117539
197_VU120-O5B	23.6	4	1.96912	0.426422	4.72026	0.756386	0.446614	0.297545	5.91937	0.109074	615.356	0.0575504	4.70311	0.880529	2.31737	0.433589	4.52169	1.77099	0.538945	0.00823744
198_VU120-O5B	25	4	2.00848	0.400083	4.93897	0.810714	0.44627	0.318876	5.51276	0.102599	624.249	0.0593617	4.53422	0.909863	2.2342	0.448054	4.00177	1.64923	0.479667	0.00783956
200_VU120-O5B	27.5	4	2.61013	0.406914	7.73713	0.777641	0.578219	0.307978	6.23784	0.116321	807.407	0.0507226	4.61	1.05845	2.27152	0.521214	3.55861	1.86572	0.346386	0.00544732
201_VU120-O5B	30	4	2.31783	0.392772	6.33339	0.701592	0.498805	0.251387	4.60359	0.116555	711.265	0.0561705	4.29417	1.23492	2.11599	0.608165	2.77678	1.37679	0.312267	0.00444185
203_VU120-O5B	10	4	2.47798	0.465164	9.46578	0.718511	0.534387	0.280684	5.26015	0.110341	759.647	0.0548174	3.91429	1.3517	1.9289	0.665745	2.70716	1.5727	0.238662	0.00346994
204_VU120-O5B	13	4	5.27096	0.381366	19.0988	0.678568	1.07529	0.23695	6.09894	0.102435	1593.21	0.0421077	3.45236	2.05598	1.70137	1.01274	1.31881	1.82185	0.137025	0.00188078
206_VU120-O5B	16	4	3.17321	0.376941	9.77034	0.650539	0.629255	0.256752	2.36762	0.121646	956.673	0.0493862	4.2555	3.16331	2.09694	1.55786	1.05025	0.706773	0.103911	0.00137554
207_VU120-O5B	21	4	3.22716	0.374143	8.38726	0.677126	0.633068	0.273559	1.96543	0.132564	974.08	0.0448023	5.73441	3.84407	2.82513	1.89237	1.15372	0.586655	0.100475	0.00138667
219_VU120-O5A	5		0.00232975	107.227	0.0274976	40.6075	0.00126327	76.6573	-0.00157524	34.0239	0.83659	80.5584	-89.9066	1263.15	-44.8734	638.242	17.1245	-0.000476994	-0.0249225	0.026283
220_VU120-O5A	7.5		0.19136	1.46314	0.0139429	73.7291	0.0371081	2.63359	0.00387937	14.3441	57.8741	1.16497	191.995	558.697	92.295	261.916	1.28361	0.00115825	0.11935	0.179313
222_VU120-O5A	10		5.37449	0.293774	0.322635	3.58358	1.01973	0.194936	1.39285	0.188966	1610.54	0.0520161	4.27975	7.28304	2.10888	3.58671	0.369999	0.416802	1.85606	0.134824
223_VU120-O5A	15	4	12.6147	0.316725	3.4779	0.799368	2.58143	0.161805	14.9555	0.0766602	3857.04	0.0348967	6.09032	1.68991	3.00033	0.831836	2.36069	4.47536	1.84878	0.0361996
225_VU120-O5A	18	4	8.14643	0.292706	7.59508	0.648053	1.84142	0.195069	24.2307	0.0790089	2548.18	0.0401662	4.81224	0.630733	2.3711	0.310576	4.57417	7.25053	1.37155	0.0235941
226_VU120-O5A	21	4	6.25131	0.28855	9.73274	0.633679	1.47652	0.22199	23.6017	0.0839845	1977.64	0.0456442	4.74768	0.4928	2.33932	0.242661	5.66338	7.06183	1.04245	0.0177181
228_VU120-O5A	25	4	5.32978	0.292541	12.5158	0.611506	1.27226	0.209632	19.802	0.0783116	1694.71	0.0502283	5.2765	0.508405	2.59969	0.25031	6.16161	5.92405	0.680041	0.0113278
229_VU120-O5A	30	4	4.65017	0.311893	14.5045	0.584971	1.05843	0.217471	13.5857	0.0825129	1457.53	0.0553659	5.17961	0.684236	2.55199	0.336888	4.82358	4.06316	0.402473	0.00655233
231_VU120-O5A	10	4	4.45341	0.379829	13.1274	0.673018	0.943982	0.255304	8.4591	0.101834	1372.18	0.0472553	5.16003	1.24963	2.54235	0.615266	3.1771	2.52909	0.276796	0.00487961
232_VU120-O5A	12	4	4.3635	0.552293	12.8892	0.665038	0.904862	0.233056	4.57573	0.142294	1330.86	0.06913	6.37407	3.23242	3.13999	1.59099	2.18696	1.36688	0.152362	0.00268469
		S	164.6	0.0589006	253.766	0.135152	35.3902	0.038463	334.252	0.0171174	50784.9	0.0100361
Information on Analysis and Constants Used in Calculations									Results		40(a)/36(a)	± 2s	40(r)/39(k)	± 2s	Age	± 2s	MSWD	39Ar(k)	K/Ca	± 2s
															(Ma)			(%,n)
Sample = 091_VU120-O5C				Age Equations = Min et al. (2000)					Age Plateau Error Mean				4.91912	0.158652	2.42373	0.0792875	1.89841	95.7286	0.180347	0.0548464
Material = groundmass				Negative Intensities = Allowed										0.0322521		0.032713	0.000910343	37
Location = CH18-14A - Christiana				Decay Constant 40K = 5.460 ± 0.053 E-10 1/a					Full External Error							0.0941325	1.4714	2σ Confidence Limit
Analyst = Klaudia Kuiper				Decay Constant 39Ar = 2.940 ± 0.016 E-07 1/h					Analytical Error							0.0781187	1.37783	Error Magnification
Project = VU120				Decay Constant 37Ar = 8.230 ± 0.012 E-04 1/h
Mass Discrimination Law = LIN				Decay Constant 36Cl = 2.257 ± 0.015 E-06 1/a					Total Fusion Age				4.97434	0.184234	2.45092	0.0917448		46	0.566087	0.00173703
Irradiation = VU120				Decay Activity 40K(EC,β⁺) = 3.310 ± 0.030 1/gs										0.0370369		0.0374328
J = 0.00026920 ± 0.00000075				Decay Activity 40K(β⁻) = 27.890 ± 0.150 1/gs					Full External Error							0.105117
FCs = 28.201 ± 0.023 Ma				Atmospheric Ratio 40/36(a) = 298.56 ± 0.31					Analytical Error							0.0907137
IGSN = Undefined				Atmospheric Ratio 38/36(a) = 0.1885 ± 0.0003
Preferred Age = Undefined				Production Ratio 39/37(ca) = 0.000673 ± 0.000004					Normal Isochron Error Chron		298.734	1.23088	4.86152	0.426849	2.39537	0.210606	2.12452	95.7286
Classification = Undefined				Production Ratio 36/37(ca) = 0.000264 ± 0.000002								0.00412034		0.0878015		0.0879223	0.000117783	37
Experiment Type = Undefined				Production Ratio 40/39(k) = 0.000860 ± 0.000070					Full External Error							0.216494	1.47809	2σ Confidence Limit
Extraction Method = Undefined				Production Ratio 38/39(k) = 0.012110 ± 0.000030					Analytical Error							0.210179	1.45757	Error Magnification
Heating = 180 sec				Production Ratio 36/38(cl) = 262.80 ± 1.71												4		Number of Iterations
Isolation = 5.00 min				Scaling Ratio K/Ca = 0.430												6.75557e-06		Convergence
Instrument = HELIX				Abundance Ratio 40K/K = 1.1700 ± 0.0100 E-04
Lithology = Undefined				Atomic Weight K = 39.0983 ± 0.0001 g					Inverse Isochron Error Chron		298.733	1.22865	4.86834	0.411463	2.39873	0.203047	2.11508	95.7286
Lat-Lon = Undefined - Undefined												0.00411287		0.0845181		0.084648	0.000129495	37
Feature = Undefined									Full External Error							0.209164	1.47809	2σ Confidence Limit
									Analytical Error							0.202603	1.45433	Error Magnification
																3		Number of Iterations
																1.13174e-06		Convergence
																0.0503596		Spreading Factor
[truncated: 15 more columns]

## Sheet: VU120-O6
Relative Abundances			36Ar [A]	%1s	37Ar [A]	%1s	38Ar [A]	%1s	39Ar [A]	%1s	40Ar [A]	%1s	40(r)/39(k)	± 2s	Age	± 2s	40Ar(r)	39Ar(k)	K/Ca	± 2s		Relative Abundances			36Ar [A]	%1s	37Ar [A]	%1s	38Ar [A]	%1s	39Ar [A]	%1s	40Ar [A]	%1s	40(r)/39(k)	± 2s	Age	± 2s	40Ar(r)	39Ar(k)	K/Ca	± 2s
															(Ma)		(%)	(%)																			(Ma)		(%)	(%)
240_VU120-O6A	5		-0.00811738	23.9693	-0.129099	59.6288	-0.00597122	39.5323	-0.00653667	6.34853	-1.57843	8.8237	-129.45	186.006	-65.7427	96.1822	-52.896	-0.00592796	0.0214829	0.025771		209_VU120-O6B	10		0.485798	0.476569	0.197944	6.36424	0.0987893	0.770397	0.373874	0.348145	146.587	0.0823769	4.17989	3.84079	2.08395	1.91379	1.06572	0.368763	0.811889	0.103496
241_VU120-O6A	7.5		0.0813564	2.44557	-0.205756	37.1778	0.0095206	24.8237	-0.00468019	9.42504	25.9611	0.54072	-364.433	278.314	-191.472	154.147	6.37551	-0.00417426	0.00949154	0.00729752		210_VU120-O6B	14		1.2261	0.404821	1.14544	1.48075	0.293587	0.360779	4.08955	0.146389	383.343	0.0415197	4.24748	0.752532	2.11762	0.374966	4.53041	4.03431	1.53493	0.0456786
243_VU120-O6A	10		0.78861	0.404517	0.064896	118.179	0.156277	1.56351	0.764169	0.137709	243.065	0.0685599	9.97519	2.6108	4.96936	1.29886	3.13591	0.702302	5.06309	11.967		212_VU120-O6B	16		0.488782	0.415624	1.70014	1.51966	0.175383	0.46595	5.53992	0.119681	173.433	0.0681149	4.98894	0.230056	2.48704	0.114608	15.9328	5.46499	1.40087	0.0427088
244_VU120-O6A	15		1.62594	0.40358	2.91111	2.76697	0.45703	0.591481	10.0544	0.0827704	544.795	0.0431306	5.92679	0.405332	2.95419	0.201873	10.936	9.23914	1.48485	0.0822073		213_VU120-O6B	18		0.45675	0.407286	3.35087	0.762129	0.212587	0.43473	8.68808	0.10816	177.808	0.0667301	4.80081	0.135175	2.39331	0.0673435	23.4517	8.57012	1.11461	0.0171598
246_VU120-O6A	18	4	0.801255	0.448812	6.61199	1.30199	0.393343	0.655744	16.4189	0.0946461	325.569	0.0581929	5.29149	0.136611	2.63775	0.0680502	26.6785	15.0864	1.06749	0.0278705		215_VU120-O6B	19	4	0.328396	0.439077	3.53601	0.937972	0.182832	0.421251	8.34823	0.104984	139.685	0.102344	5.02195	0.111902	2.50348	0.0557459	30.005	8.23468	1.01491	0.019158
247_VU120-O6A	21	4	0.695395	0.453451	10.2862	0.934585	0.418552	0.612247	19.3363	0.086009	308.471	0.0590967	5.25896	0.102091	2.62155	0.0508552	32.9537	17.7655	0.80804	0.0151675		216_VU120-O6B	20	4	0.207844	0.510779	3.1164	0.946195	0.136618	0.420471	6.78784	0.104161	97.0009	0.141782	5.18559	0.104147	2.585	0.0518803	36.2761	6.69535	0.936296	0.0178255
249_VU120-O6A	25	4	0.637195	0.58917	15.0846	0.768829	0.425651	0.636132	20.6049	0.077748	296.728	0.0578337	5.22772	0.112061	2.60598	0.0558217	36.2835	18.9285	0.587069	0.0090732		218_VU120-O6B	21	4	0.200141	0.647178	3.92609	0.922892	0.144398	0.40492	7.14931	0.108476	95.8411	0.142942	5.09219	0.116638	2.53847	0.0581041	37.9714	7.05147	0.78273	0.014547
250_VU120-O6A	30	4	0.657348	0.470776	14.5498	0.797464	0.337242	0.759505	14.4959	0.0906686	269.661	0.0663188	5.14566	0.133252	2.5651	0.0663796	27.6424	13.3141	0.42812	0.00687226		219_VU120-O6B	22.3	4	0.181868	0.615703	4.01006	0.767802	0.134656	0.496023	6.71275	0.1175	88.1201	0.159321	5.08695	0.11002	2.53586	0.0548076	38.7354	6.62067	0.719521	0.0111777
252_VU120-O6A	10	4	0.70992	0.434709	14.4375	0.803935	0.290751	0.857924	10.5176	0.0868673	266.394	0.0620548	5.28858	0.183235	2.6363	0.091275	20.8608	9.65776	0.312964	0.0050614		221_VU120-O6B	23.6	4	0.163029	0.669997	4.13729	0.89732	0.11823	0.672667	6.16094	0.11391	80.1232	0.171791	5.1592	0.116715	2.57185	0.0581412	39.6529	6.07612	0.640033	0.0115786
253_VU120-O6A	12		1.36568	0.356358	21.263	0.686966	0.404722	0.712126	10.0657	0.0909916	462.931	0.0451874	5.65721	0.304134	2.81992	0.151483	12.2832	9.23815	0.203268	0.00281724		222_VU120-O6B	25	4	0.177834	0.685262	5.35781	0.722816	0.134549	0.442981	6.73759	0.102304	87.3985	0.158045	5.15635	0.117206	2.57043	0.0583861	39.7293	6.64428	0.540447	0.00789083
255_VU120-O6A	15		1.13719	0.36539	15.2216	0.766752	0.327484	0.773858	6.62362	0.104597	376.65	0.0557527	5.79523	0.395309	2.88866	0.196889	10.1755	6.0783	0.186824	0.00289157		224_VU120-O6B	27.5	4	0.2018	0.700713	6.56185	0.737117	0.14222	0.605679	7.02498	0.110139	95.4577	0.155174	5.08806	0.129175	2.53641	0.0643495	37.4208	6.92705	0.46006	0.00685774
																						225_VU120-O6B	30	4	0.194641	0.618265	6.56893	0.685543	0.125139	0.633217	6.15183	0.109917	89.2628	0.153439	5.15089	0.12712	2.56771	0.0633249	35.4735	6.06552	0.402407	0.00558792
																						227_VU120-O6B	9.5	4	0.182788	0.772536	5.53093	0.836004	0.105924	0.693061	4.6811	0.11441	77.0264	0.179936	4.89304	0.191621	2.43926	0.0954624	29.7127	4.61508	0.363641	0.00613688
		S	8.49177	0.148024	100.096	0.340471	3.2146	0.264873	108.87	0.0322603	3118.65	0.0194472										228_VU120-O6B	11	4	0.831422	0.430275	15.7015	0.646935	0.27248	0.295331	8.17705	0.116069	286.322	0.0567794	4.81543	0.272207	2.4006	0.135612	13.7346	8.0577	0.223647	0.00294003
																						230_VU120-O6B	13		0.989901	0.429726	15.0097	0.631106	0.286145	0.320952	6.58278	0.109793	330.301	0.0535035	5.46741	0.401341	2.72538	0.19991	10.8796	6.48513	0.188295	0.00241249
																						231_VU120-O6B	16		0.721804	0.448861	11.8258	0.829672	0.205597	0.458851	4.8845	0.11906	238.612	0.0689801	4.92944	0.412882	2.45739	0.205689	10.0744	4.81158	0.177317	0.00297255
																						233_VU120-O6B	21		0.490332	0.468018	7.4331	0.743293	0.143112	0.456606	3.32642	0.122893	163.455	0.0886945	5.31273	0.431683	2.64833	0.215033	10.7955	3.27717	0.192142	0.00289525
Information on Analysis and Constants Used in Calculations									Results		40(a)/36(a)	± 2s	40(r)/39(k)	± 2s	Age	± 2s	MSWD	39Ar(k)	K/Ca	± 2s
															(Ma)			(%,n)
																								S	7.52923	0.131814	99.1098	0.219556	2.91225	0.112	101.417	0.0286261	2749.78	0.0214989
Sample = 240_VU120-O6A				Age Equations = Min et al. (2000)					Age Plateau				5.23916	0.05632	2.61168	0.0303142	0.759927	74.7522	0.426969	0.15926
Material = groundmass				Negative Intensities = Allowed										0.0107498		0.0116072	0.551202	5
Location = CH18-16 - Christiana				Decay Constant 40K = 5.460 ± 0.053 E-10 1/a					Full External Error							0.0625129	2.41421	2σ Confidence Limit
Analyst = Klaudia Kuiper				Decay Constant 39Ar = 2.940 ± 0.016 E-07 1/h					Analytical Error							0.0280551	1	Error Magnification				Information on Analysis and Constants Used in Calculations									Results		40(a)/36(a)	± 2s	40(r)/39(k)	± 2s	Age	± 2s	MSWD	39Ar(k)	K/Ca	± 2s
Project = VU120				Decay Constant 37Ar = 8.230 ± 0.012 E-04 1/h																																	(Ma)			(%,n)
Mass Discrimination Law = LIN				Decay Constant 36Cl = 2.257 ± 0.015 E-06 1/a					Total Fusion Age				5.43336	0.0720005	2.70842	0.0377896		11	0.467405	0.00319704
Irradiation = VU120				Decay Activity 40K(EC,β⁺) = 3.310 ± 0.030 1/gs										0.0132516		0.0139526						Sample = 209_VU120-O6B				Age Equations = Min et al. (2000)					Age Plateau				5.10221	0.0534493	2.54346	0.0288794	1.81957	66.9879	0.365335	0.119341
J = 0.00027237 ± 0.00000060				Decay Activity 40K(β⁻) = 27.890 ± 0.150 1/gs					Full External Error							0.0681348						Material = groundmass				Negative Intensities = Allowed										0.0104757		0.0113543	0.0594309	10
FCs = 28.201 ± 0.023 Ma				Atmospheric Ratio 40/36(a) = 298.56 ± 0.31					Analytical Error							0.0358642						Location = CH18-16 - Christiana				Decay Constant 40K = 5.460 ± 0.053 E-10 1/a					Full External Error							0.0605715	1.94281	2σ Confidence Limit
IGSN = Undefined				Atmospheric Ratio 38/36(a) = 0.1885 ± 0.0003																		Analyst = Klaudia Kuiper				Decay Constant 39Ar = 2.940 ± 0.016 E-07 1/h					Analytical Error							0.0266261	1.34891	Error Magnification
Preferred Age = Undefined				Production Ratio 39/37(ca) = 0.000673 ± 0.000004					Normal Isochron		299.687	5.22749	5.19212	0.22354	2.58825	0.111935	1.0063	74.7522				Project = VU120				Decay Constant 37Ar = 8.230 ± 0.012 E-04 1/h
Classification = Undefined				Production Ratio 36/37(ca) = 0.000264 ± 0.000002								0.0174432		0.0430538		0.0432474	0.388719	5				Mass Discrimination Law = LIN				Decay Constant 36Cl = 2.257 ± 0.015 E-06 1/a					Total Fusion Age				5.0281	0.061244	2.50655	0.0324393		17	0.43972	0.00194723
Experiment Type = Undefined				Production Ratio 40/39(k) = 0.000860 ± 0.000070					Full External Error							0.124358	2.63299	2σ Confidence Limit				Irradiation = VU120				Decay Activity 40K(EC,β⁺) = 3.310 ± 0.030 1/gs										0.0121803		0.0129418
Extraction Method = Undefined				Production Ratio 38/39(k) = 0.012110 ± 0.000030					Analytical Error							0.111355	1.00315	Error Magnification				J = 0.00027237 ± 0.00000060				Decay Activity 40K(β⁻) = 27.890 ± 0.150 1/gs					Full External Error							0.0616891
Heating = 180 sec				Production Ratio 36/38(cl) = 262.80 ± 1.71												6		Number of Iterations				FCs = 28.201 ± 0.023 Ma				Atmospheric Ratio 40/36(a) = 298.56 ± 0.31					Analytical Error							0.0305097
Isolation = 5.00 min				Scaling Ratio K/Ca = 0.430												2.54141e-05		Convergence				IGSN = Undefined				Atmospheric Ratio 38/36(a) = 0.1885 ± 0.0003
Instrument = HELIX				Abundance Ratio 40K/K = 1.1700 ± 0.0100 E-04																		Preferred Age = Undefined				Production Ratio 39/37(ca) = 0.000673 ± 0.000004					Normal Isochron		293.586	3.57808	5.25859	0.1204	2.62136	0.061073	1.09984	66.9879
Lithology = Undefined				Atomic Weight K = 39.0983 ± 0.0001 g					Inverse Isochron		299.702	5.20724	5.19198	0.222367	2.58818	0.111354	0.996964	74.7522				Classification = Undefined				Production Ratio 36/37(ca) = 0.000264 ± 0.000002								0.0121875		0.0228959		0.0232982	0.359557	10
Lat-Lon = Undefined - Undefined												0.0173748		0.042829		0.043024	0.393032	5				Experiment Type = Undefined				Production Ratio 40/39(k) = 0.000860 ± 0.000070					Full External Error							0.0821037	2	2σ Confidence Limit
Feature = Undefined									Full External Error							0.123835	2.63299	2σ Confidence Limit				Extraction Method = Undefined				Production Ratio 38/39(k) = 0.012110 ± 0.000030					Analytical Error							0.0599756	1.04873	Error Magnification
									Analytical Error							0.110771	1	Error Magnification				Heating = 180 sec				Production Ratio 36/38(cl) = 262.80 ± 1.71												7		Number of Iterations
																2		Number of Iterations				Isolation = 5.00 min				Scaling Ratio K/Ca = 0.430												1.9912e-05		Convergence
																0.00054254		Convergence				Instrument = HELIX				Abundance Ratio 40K/K = 1.1700 ± 0.0100 E-04
																0.155571		Spreading Factor				Lithology = Undefined				Atomic Weight K = 39.0983 ± 0.0001 g					Inverse Isochron		293.602	3.56082	5.25904	0.11967	2.62159	0.0607158	1.09167	66.9879
																						Lat-Lon = Undefined - Undefined												0.012128		0.022755		0.0231599	0.365283	10
																						Feature = Undefined									Full External Error							0.0818414	2	2σ Confidence Limit
																															Analytical Error							0.0596116	1.04483	Error Magnification
																																						3		Number of Iterations
																																						4.67456e-05		Convergence
																																						0.25523		Spreading Factor
Relative Abundances			36Ar [A]	%1s	37Ar [A]	%1s	38Ar [A]	%1s	39Ar [A]	%1s	40Ar [A]	%1s	40(r)/39(k)	± 2s	Age	± 2s	40Ar(r)	39Ar(k)	K/Ca	± 2s
															(Ma)		(%)	(%)
209_VU120-O6B	10		0.485798	0.476569	0.197944	6.36424	0.0987893	0.770397	0.373874	0.348145	146.587	0.0823769	4.17989	3.84079	2.08395	1.91379	1.06572	0.177842	0.811889	0.103496
210_VU120-O6B	14		1.2261	0.404821	1.14544	1.48075	0.293587	0.360779	4.08955	0.146389	383.343	0.0415197	4.24748	0.752532	2.11762	0.374966	4.53041	1.94562	1.53493	0.0456786
212_VU120-O6B	16		0.488782	0.415624	1.70014	1.51966	0.175383	0.46595	5.53992	0.119681	173.433	0.0681149	4.98894	0.230056	2.48704	0.114608	15.9328	2.63559	1.40087	0.0427088
213_VU120-O6B	18		0.45675	0.407286	3.35087	0.762129	0.212587	0.43473	8.68808	0.10816	177.808	0.0667301	4.80081	0.135175	2.39331	0.0673435	23.4517	4.1331	1.11461	0.0171598
215_VU120-O6B	19	4	0.328396	0.439077	3.53601	0.937972	0.182832	0.421251	8.34823	0.104984	139.685	0.102344	5.02195	0.111902	2.50348	0.0557459	30.005	3.97132	1.01491	0.019158
216_VU120-O6B	20	4	0.207844	0.510779	3.1164	0.946195	0.136618	0.420471	6.78784	0.104161	97.0009	0.141782	5.18559	0.104147	2.585	0.0518803	36.2761	3.22895	0.936296	0.0178255
218_VU120-O6B	21	4	0.200141	0.647178	3.92609	0.922892	0.144398	0.40492	7.14931	0.108476	95.8411	0.142942	5.09219	0.116638	2.53847	0.0581041	37.9714	3.4007	0.78273	0.014547
219_VU120-O6B	22.3	4	0.181868	0.615703	4.01006	0.767802	0.134656	0.496023	6.71275	0.1175	88.1201	0.159321	5.08695	0.11002	2.53586	0.0548076	38.7354	3.19294	0.719521	0.0111777
221_VU120-O6B	23.6	4	0.163029	0.669997	4.13729	0.89732	0.11823	0.672667	6.16094	0.11391	80.1232	0.171791	5.1592	0.116715	2.57185	0.0581412	39.6529	2.93032	0.640033	0.0115786
222_VU120-O6B	25	4	0.177834	0.685262	5.35781	0.722816	0.134549	0.442981	6.73759	0.102304	87.3985	0.158045	5.15635	0.117206	2.57043	0.0583861	39.7293	3.20433	0.540447	0.00789083
224_VU120-O6B	27.5	4	0.2018	0.700713	6.56185	0.737117	0.14222	0.605679	7.02498	0.110139	95.4577	0.155174	5.08806	0.129175	2.53641	0.0643495	37.4208	3.34069	0.46006	0.00685774
225_VU120-O6B	30	4	0.194641	0.618265	6.56893	0.685543	0.125139	0.633217	6.15183	0.109917	89.2628	0.153439	5.15089	0.12712	2.56771	0.0633249	35.4735	2.92521	0.402407	0.00558792
227_VU120-O6B	9.5		0.182788	0.772536	5.53093	0.836004	0.105924	0.693061	4.6811	0.11441	77.0264	0.179936	4.89304	0.191621	2.43926	0.0954624	29.7127	2.2257	0.363641	0.00613688
228_VU120-O6B	11		0.831422	0.430275	15.7015	0.646935	0.27248	0.295331	8.17705	0.116069	286.322	0.0567794	4.81543	0.272207	2.4006	0.135612	13.7346	3.88597	0.223647	0.00294003
230_VU120-O6B	13		0.989901	0.429726	15.0097	0.631106	0.286145	0.320952	6.58278	0.109793	330.301	0.0535035	5.46741	0.401341	2.72538	0.19991	10.8796	3.12757	0.188295	0.00241249
231_VU120-O6B	16		0.721804	0.448861	11.8258	0.829672	0.205597	0.458851	4.8845	0.11906	238.612	0.0689801	4.92944	0.412882	2.45739	0.205689	10.0744	2.32047	0.177317	0.00297255
233_VU120-O6B	21		0.490332	0.468018	7.4331	0.743293	0.143112	0.456606	3.32642	0.122893	163.455	0.0886945	5.31273	0.431683	2.64833	0.215033	10.7955	1.58048	0.192142	0.00289525
240_VU120-O6A	5		-0.00811738	23.9693	-0.129099	59.6288	-0.00597122	39.5323	-0.00653667	6.34853	-1.57843	8.8237	-129.45	186.006	-65.7427	96.1822	-52.896	-0.00306909	0.0214829	0.025771
241_VU120-O6A	7.5		0.0813564	2.44557	-0.205756	37.1778	0.0095206	24.8237	-0.00468019	9.42504	25.9611	0.54072	-364.433	278.314	-191.472	154.147	6.37551	-0.00216115	0.00949154	0.00729752
243_VU120-O6A	10		0.78861	0.404517	0.064896	118.179	0.156277	1.56351	0.764169	0.137709	243.065	0.0685599	9.97519	2.6108	4.96936	1.29886	3.13591	0.363604	5.06309	11.967
244_VU120-O6A	15		1.62594	0.40358	2.91111	2.76697	0.45703	0.591481	10.0544	0.0827704	544.795	0.0431306	5.92679	0.405332	2.95419	0.201873	10.936	4.7834	1.48485	0.0822073
246_VU120-O6A	18	4	0.801255	0.448812	6.61199	1.30199	0.393343	0.655744	16.4189	0.0946461	325.569	0.0581929	5.29149	0.136611	2.63775	0.0680502	26.6785	7.81071	1.06749	0.0278705
247_VU120-O6A	21	4	0.695395	0.453451	10.2862	0.934585	0.418552	0.612247	19.3363	0.086009	308.471	0.0590967	5.25896	0.102091	2.62155	0.0508552	32.9537	9.19776	0.80804	0.0151675
249_VU120-O6A	25	4	0.637195	0.58917	15.0846	0.768829	0.425651	0.636132	20.6049	0.077748	296.728	0.0578337	5.22772	0.112061	2.60598	0.0558217	36.2835	9.79988	0.587069	0.0090732
250_VU120-O6A	30	4	0.657348	0.470776	14.5498	0.797464	0.337242	0.759505	14.4959	0.0906686	269.661	0.0663188	5.14566	0.133252	2.5651	0.0663796	27.6424	6.89314	0.42812	0.00687226
252_VU120-O6A	10	4	0.70992	0.434709	14.4375	0.803935	0.290751	0.857924	10.5176	0.0868673	266.394	0.0620548	5.28858	0.183235	2.6363	0.091275	20.8608	5.00013	0.312964	0.0050614
253_VU120-O6A	12		1.36568	0.356358	21.263	0.686966	0.404722	0.712126	10.0657	0.0909916	462.931	0.0451874	5.65721	0.304134	2.81992	0.151483	12.2832	4.78288	0.203268	0.00281724
255_VU120-O6A	15		1.13719	0.36539	15.2216	0.766752	0.327484	0.773858	6.62362	0.104597	376.65	0.0557527	5.79523	0.395309	2.88866	0.196889	10.1755	3.14693	0.186824	0.00289157
		S	16.021	0.0999661	199.206	0.202978	6.12685	0.14882	210.287	0.0216691	5868.42	0.0144322
Information on Analysis and Constants Used in Calculations									Results		40(a)/36(a)	± 2s	40(r)/39(k)	± 2s	Age	± 2s	MSWD	39Ar(k)	K/Ca	± 2s
															(Ma)			(%,n)
Sample = 209_VU120-O6B				Age Equations = Min et al. (2000)					Age Plateau				5.16008	0.0444922	2.57229	0.0248827	1.80427	64.8961	0.487847	0.0976938
Material = groundmass				Negative Intensities = Allowed										0.0086224		0.00967337	0.0416189	13
Location = CH18-16 - Christiana				Decay Constant 40K = 5.460 ± 0.053 E-10 1/a					Full External Error							0.059318	1.8165	2σ Confidence Limit
Analyst = Klaudia Kuiper				Decay Constant 39Ar = 2.940 ± 0.016 E-07 1/h					Analytical Error							0.0221637	1.34323	Error Magnification
Project = VU120				Decay Constant 37Ar = 8.230 ± 0.012 E-04 1/h
Mass Discrimination Law = LIN				Decay Constant 36Cl = 2.257 ± 0.015 E-06 1/a					Total Fusion Age				5.23792	0.0475592	2.61106	0.0263262		28	0.453631	0.00185202
Irradiation = VU120				Decay Activity 40K(EC,β⁺) = 3.310 ± 0.030 1/gs										0.0090798		0.0100825
J = 0.00027237 ± 0.00000060				Decay Activity 40K(β⁻) = 27.890 ± 0.150 1/gs					Full External Error							0.0606677
FCs = 28.201 ± 0.023 Ma				Atmospheric Ratio 40/36(a) = 298.56 ± 0.31					Analytical Error							0.023691
IGSN = Undefined				Atmospheric Ratio 38/36(a) = 0.1885 ± 0.0003
Preferred Age = Undefined				Production Ratio 39/37(ca) = 0.000673 ± 0.000004					Normal Isochron		302.19	4.73633	5.0364	0.165799	2.51068	0.0833297	1.68877	64.8961
Classification = Undefined				Production Ratio 36/37(ca) = 0.000264 ± 0.000002								0.0156733		0.0329202		0.0331901	0.0691317	13
Experiment Type = Undefined				Production Ratio 40/39(k) = 0.000860 ± 0.000070					Full External Error							0.0985198	1.8528	2σ Confidence Limit
Extraction Method = Undefined				Production Ratio 38/39(k) = 0.012110 ± 0.000030					Analytical Error							0.0825952	1.29953	Error Magnification
Heating = 180 sec				Production Ratio 36/38(cl) = 262.80 ± 1.71												2		Number of Iterations
Isolation = 5.00 min				Scaling Ratio K/Ca = 0.430												2.52948e-05		Convergence
Instrument = HELIX				Abundance Ratio 40K/K = 1.1700 ± 0.0100 E-04
Lithology = Undefined				Atomic Weight K = 39.0983 ± 0.0001 g					Inverse Isochron		302.223	4.72045	5.03662	0.16474	2.51079	0.0828069	1.67674	64.8961
Lat-Lon = Undefined - Undefined												0.0156191		0.0327085		0.0329805	0.0718297	13
Feature = Undefined									Full External Error							0.0980792	1.8528	2σ Confidence Limit
									Analytical Error							0.0820676	1.29489	Error Magnification
																3		Number of Iterations
																5.04615e-05		Convergence
																0.189417		Spreading Factor

## Sheet: VU120-O7
Relative Abundances			36Ar [A]	%1s	37Ar [A]	%1s	38Ar [A]	%1s	39Ar [A]	%1s	40Ar [A]	%1s	40(r)/39(k)	± 2s	Age	± 2s	40Ar(r)	39Ar(k)	K/Ca	± 2s		Relative Abundances			36Ar [A]	%1s	37Ar [A]	%1s	38Ar [A]	%1s	39Ar [A]	%1s	40Ar [A]	%1s	40(r)/39(k)	± 2s	Age	± 2s	40Ar(r)	39Ar(k)	K/Ca	± 2s
															(Ma)		(%)	(%)																			(Ma)		(%)	(%)
008_VU120-O7A	5		-0.0012162	36.4073	0.00252334	465.832	0.000119988	258.249	-0.00145674	66.2453	-0.0301699	688.529	-228.445	453.229	-116.27	238.161	-1104.32	-0.00286222	-0.248531	2.33871		241_VU120-O7B	10		0.203749	0.582145	0.159101	9.15652	0.0425704	1.31191	0.271846	0.481042	61.0458	0.27273	0.834932	2.91746	0.411687	1.43838	0.371661	0.510487	0.734422	0.134681
009_VU120-O7A	7.5		0.0295797	1.71163	0.00644739	187.518	0.00616098	4.95927	0.0223259	4.41902	9.17503	2.26974	15.4216	23.1114	7.58915	11.3499	3.75185	0.0438068	1.48871	5.58475		242_VU120-O7B	13		0.275848	0.520646	1.0335	1.92235	0.0745838	0.67419	1.34158	0.130697	87.5989	0.19191	3.96945	0.698794	1.95642	0.344231	6.07609	2.51899	0.557894	0.021499
011_VU120-O7A	10		0.341733	0.445532	0.50682	3.08869	0.0774154	0.775055	0.833344	0.22252	105.79	0.200623	4.56324	1.23129	2.24891	0.606446	3.59317	1.63479	0.706743	0.0437715		244_VU120-O7B	16		0.120258	0.658623	2.77873	1.03091	0.0702952	1.04939	3.33645	0.128507	51.9318	0.330913	4.87149	0.177185	2.40073	0.0872615	31.2803	6.26433	0.516016	0.0107217
012_VU120-O7A	15	4	0.182453	0.611547	6.02405	0.80917	0.130834	0.393285	7.26558	0.124064	91.8698	0.233149	5.21462	0.110938	2.5697	0.0546308	41.2171	14.251	0.518331	0.0084865		245_VU120-O7B	18	4	0.0415516	1.76208	2.5834	1.01315	0.049834	0.953321	3.30065	0.120769	29.4653	0.562859	5.23224	0.167017	2.57838	0.0822457	58.5796	6.19731	0.549095	0.0112052
014_VU120-O7A	18	4	0.0438681	1.37602	5.51863	0.778566	0.101244	0.610557	7.73603	0.126084	54.3527	0.38754	5.39085	0.0730698	2.65648	0.035981	76.6913	15.1749	0.602487	0.00950385		247_VU120-O7B	20	4	0.0201634	2.62516	3.05598	0.821851	0.0578123	0.812292	4.24797	0.122199	28.3394	0.583765	5.31259	0.108592	2.61795	0.0534738	79.5954	7.97636	0.597433	0.00992809
015_VU120-O7A	21	4	0.0418641	1.05323	5.61498	0.723695	0.104605	0.441879	8.20437	0.102023	56.1924	0.371826	5.38119	0.0613067	2.65173	0.0301887	78.5319	16.0939	0.628008	0.00917969		248_VU120-O7B	22	4	0.0164322	3.13121	3.26363	0.898682	0.0580633	1.17799	4.69813	0.117354	29.6532	0.556361	5.32385	0.0968487	2.62349	0.047691	84.3093	8.82176	0.618713	0.011215
017_VU120-O7A	25	4	0.0537543	0.907633	5.91206	0.694789	0.100428	0.575542	7.72519	0.105411	56.4817	0.372561	5.29609	0.0673673	2.60982	0.0331738	72.399	15.1531	0.561584	0.00789304		250_VU120-O7B	25	4	0.0198957	2.84038	4.35732	0.76493	0.078031	0.945384	6.29494	0.122919	39.2804	0.422363	5.35257	0.0763882	2.63763	0.0376154	85.7384	11.8201	0.620924	0.00962124
018_VU120-O7A	30	4	0.0871668	0.697172	5.48193	0.717505	0.08291	0.613087	5.79602	0.121938	56.3363	0.371549	5.30682	0.0969658	2.6151	0.0477489	54.5632	11.3676	0.454348	0.00661354		251_VU120-O7B	29	4	0.0297889	2.24832	6.1452	0.745788	0.0997723	0.66349	7.99947	0.108389	51.2871	0.324328	5.36199	0.0661415	2.64227	0.0325696	83.5899	15.02	0.559459	0.00843253
020_VU120-O7A	10	4	0.0416069	1.47965	5.81252	0.732477	0.0620328	0.904949	4.63494	0.106767	36.7473	0.569102	5.35072	0.12092	2.63672	0.0595438	67.4317	9.08854	0.342595	0.00507199		253_VU120-O7B	10	4	0.026049	2.55145	6.79379	0.724271	0.0975895	0.584479	7.84015	0.10538	49.3649	0.339551	5.37502	0.067303	2.64869	0.0331414	85.3166	14.7199	0.495938	0.00725961
021_VU120-O7A	12	4	0.0690889	0.786616	4.97581	0.770127	0.0544964	0.926294	3.60051	0.132354	39.7888	0.52539	5.43504	0.148313	2.67824	0.0730311	49.1362	7.05955	0.31086	0.00485837		254_VU120-O7B	13	4	0.0756471	1.07128	11.9896	0.769177	0.123499	0.58908	9.12455	0.116187	69.7002	0.243524	5.27091	0.066205	2.59742	0.0326017	68.9412	17.1262	0.326957	0.00508692
023_VU120-O7A	15	4	0.150197	0.645604	3.44108	0.927351	0.0598399	0.866854	2.66757	0.183628	59.0722	0.353544	5.43979	0.27087	2.68058	0.13338	24.5436	5.23065	0.333053	0.00629729		256_VU120-O7B	21		0.0917809	0.90947	6.35056	0.730791	0.0748419	0.883064	4.80815	0.111139	51.6717	0.322969	5.15542	0.125952	2.54055	0.0620249	47.9295	9.02455	0.325273	0.0048089
024_VU120-O7A	21	4	0.288623	0.454823	2.41116	0.949719	0.0871423	0.585848	2.50092	0.141997	99.4546	0.21214	5.39011	0.363629	2.65612	0.179058	13.5454	4.90496	0.445718	0.00856038
																								S	0.921164	0.302038	48.5108	0.290757	0.826893	0.250681	53.2639	0.0394111	549.339	0.100953
		S	1.32872	0.219671	45.708	0.263091	0.867229	0.203091	50.9854	0.0416924	665.23	0.109347
																						Information on Analysis and Constants Used in Calculations									Results		40(a)/36(a)	± 2s	40(r)/39(k)	± 2s	Age	± 2s	MSWD	39Ar(k)	K/Ca	± 2s
Information on Analysis and Constants Used in Calculations									Results		40(a)/36(a)	± 2s	40(r)/39(k)	± 2s	Age	± 2s	MSWD	39Ar(k)	K/Ca	± 2s																	(Ma)			(%,n)
															(Ma)			(%,n)
																						Sample = 241_VU120-O7B				Age Equations = Min et al. (2000)					Age Plateau				5.33186	0.0346118	2.62744	0.0225094	1.28919	81.6816	0.478826	0.097382
Sample = 008_VU120-O7A				Age Equations = Min et al. (2000)					Age Plateau				5.3439	0.0407752	2.63336	0.0249061	1.65656	98.3243	0.417129	0.0766422		Material = groundmass				Negative Intensities = Allowed										0.00649151		0.00856704	0.258155	7
Material = groundmass				Negative Intensities = Allowed										0.00763024		0.0094579	0.103453	9				Location = CH18-04 - Christiana				Decay Constant 40K = 5.460 ± 0.053 E-10 1/a					Full External Error							0.0594284	2.1547	2σ Confidence Limit
Location = CH18-04 - Christiana				Decay Constant 40K = 5.460 ± 0.053 E-10 1/a					Full External Error							0.0604899	2	2σ Confidence Limit				Analyst = Klaudia Kuiper				Decay Constant 39Ar = 2.940 ± 0.016 E-07 1/h					Analytical Error							0.0170438	1.13543	Error Magnification
Analyst = Klaudia Kuiper				Decay Constant 39Ar = 2.940 ± 0.016 E-07 1/h					Analytical Error							0.0200788	1.28707	Error Magnification				Project = VU120				Decay Constant 37Ar = 8.230 ± 0.012 E-04 1/h
Project = VU120				Decay Constant 37Ar = 8.230 ± 0.012 E-04 1/h																		Mass Discrimination Law = LIN				Decay Constant 36Cl = 2.257 ± 0.015 E-06 1/a					Total Fusion Age				5.22429	0.0380235	2.57447	0.0236254		11	0.471842	0.00276895
Mass Discrimination Law = LIN				Decay Constant 36Cl = 2.257 ± 0.015 E-06 1/a					Total Fusion Age				5.33982	0.0452338	2.63136	0.0267015		12	0.479357	0.0025538		Irradiation = VU120				Decay Activity 40K(EC,β⁺) = 3.310 ± 0.030 1/gs										0.00727821		0.00917681
Irradiation = VU120				Decay Activity 40K(EC,β⁺) = 3.310 ± 0.030 1/gs										0.00847103		0.0101474						J = 0.00026925 ± 0.00000075				Decay Activity 40K(β⁻) = 27.890 ± 0.150 1/gs					Full External Error							0.0588434
J = 0.00026925 ± 0.00000075				Decay Activity 40K(β⁻) = 27.890 ± 0.150 1/gs					Full External Error							0.0612132						FCs = 28.201 ± 0.023 Ma				Atmospheric Ratio 40/36(a) = 298.56 ± 0.31					Analytical Error							0.0187243
FCs = 28.201 ± 0.023 Ma				Atmospheric Ratio 40/36(a) = 298.56 ± 0.31					Analytical Error							0.0222743						IGSN = Undefined				Atmospheric Ratio 38/36(a) = 0.1885 ± 0.0003
IGSN = Undefined				Atmospheric Ratio 38/36(a) = 0.1885 ± 0.0003																		Preferred Age = Undefined				Production Ratio 39/37(ca) = 0.000673 ± 0.000004					Normal Isochron Overestimated Error		282.381	12.362	5.40656	0.0648085	2.66422	0.0352236	0.235518	81.6816
Preferred Age = Undefined				Production Ratio 39/37(ca) = 0.000673 ± 0.000004					Normal Isochron		297.917	3.5084	5.34945	0.0573261	2.6361	0.0318508	1.89056	98.3243				Classification = Undefined				Production Ratio 36/37(ca) = 0.000264 ± 0.000002								0.0437778		0.011987		0.013221	0.947009	7
Classification = Undefined				Production Ratio 36/37(ca) = 0.000264 ± 0.000002								0.0117765		0.0107163		0.0120826	0.0666094	9				Experiment Type = Undefined				Production Ratio 40/39(k) = 0.000860 ± 0.000070					Full External Error							0.0659622	2.26491	2σ Confidence Limit
Experiment Type = Undefined				Production Ratio 40/39(k) = 0.000860 ± 0.000070					Full External Error							0.0637142	2.06904	2σ Confidence Limit				Extraction Method = Undefined				Production Ratio 38/39(k) = 0.012110 ± 0.000030					Analytical Error							0.0319128	1	Error Magnification
Extraction Method = Undefined				Production Ratio 38/39(k) = 0.012110 ± 0.000030					Analytical Error							0.0282288	1.37498	Error Magnification				Heating = 180 sec				Production Ratio 36/38(cl) = 262.80 ± 1.71												27		Number of Iterations
Heating = 180 sec				Production Ratio 36/38(cl) = 262.80 ± 1.71												19		Number of Iterations				Isolation = 5.00 min				Scaling Ratio K/Ca = 0.430												5.36514e-05		Convergence
Isolation = 5.00 min				Scaling Ratio K/Ca = 0.430												5.12443e-05		Convergence				Instrument = HELIX				Abundance Ratio 40K/K = 1.1700 ± 0.0100 E-04
Instrument = HELIX				Abundance Ratio 40K/K = 1.1700 ± 0.0100 E-04																		Lithology = Undefined				Atomic Weight K = 39.0983 ± 0.0001 g					Inverse Isochron Overestimated Error		282.171	12.3347	5.40808	0.0646119	2.66497	0.0351376	0.234316	81.6816
Lithology = Undefined				Atomic Weight K = 39.0983 ± 0.0001 g					Inverse Isochron		297.958	3.49065	5.35063	0.0569292	2.63668	0.0316792	1.8803	98.3243				Lat-Lon = Undefined - Undefined												0.0437137		0.0119473		0.013185	0.947574	7
Lat-Lon = Undefined - Undefined												0.0117152		0.0106397		0.0120148	0.0682553	9				Feature = Undefined									Full External Error							0.0659296	2.26491	2σ Confidence Limit
Feature = Undefined									Full External Error							0.0636392	2.06904	2σ Confidence Limit													Analytical Error							0.031816	1	Error Magnification
									Analytical Error							0.0280333	1.37124	Error Magnification																				4		Number of Iterations
																3		Number of Iterations																				0.000284467		Convergence
																0.000404711		Convergence																				0.260852		Spreading Factor
																0.646493		Spreading Factor
Relative Abundances			36Ar [A]	%1s	37Ar [A]	%1s	38Ar [A]	%1s	39Ar [A]	%1s	40Ar [A]	%1s	40(r)/39(k)	± 2s	Age	± 2s	40Ar(r)	39Ar(k)	K/Ca	± 2s
															(Ma)		(%)	(%)
008_VU120-O7A	5		-0.0012162	36.4073	0.00252334	465.832	0.000119988	258.249	-0.00145674	66.2453	-0.0301699	688.529	-228.445	453.229	-116.27	238.161	-1104.32	-0.00139984	-0.248531	2.33871
009_VU120-O7A	7.5		0.0295797	1.71163	0.00644739	187.518	0.00616098	4.95927	0.0223259	4.41902	9.17503	2.26974	15.4216	23.1114	7.58915	11.3499	3.75185	0.0214248	1.48871	5.58475
011_VU120-O7A	10		0.341733	0.445532	0.50682	3.08869	0.0774154	0.775055	0.833344	0.22252	105.79	0.200623	4.56324	1.23129	2.24891	0.606446	3.59317	0.799536	0.706743	0.0437715
012_VU120-O7A	15	4	0.182453	0.611547	6.02405	0.80917	0.130834	0.393285	7.26558	0.124064	91.8698	0.233149	5.21462	0.110938	2.5697	0.0546308	41.2171	6.96978	0.518331	0.0084865
014_VU120-O7A	18	4	0.0438681	1.37602	5.51863	0.778566	0.101244	0.610557	7.73603	0.126084	54.3527	0.38754	5.39085	0.0730698	2.65648	0.035981	76.6913	7.42166	0.602487	0.00950385
015_VU120-O7A	21	4	0.0418641	1.05323	5.61498	0.723695	0.104605	0.441879	8.20437	0.102023	56.1924	0.371826	5.38119	0.0613067	2.65173	0.0301887	78.5319	7.87112	0.628008	0.00917969
017_VU120-O7A	25	4	0.0537543	0.907633	5.91206	0.694789	0.100428	0.575542	7.72519	0.105411	56.4817	0.372561	5.29609	0.0673673	2.60982	0.0331738	72.399	7.41099	0.561584	0.00789304
018_VU120-O7A	30	4	0.0871668	0.697172	5.48193	0.717505	0.08291	0.613087	5.79602	0.121938	56.3363	0.371549	5.30682	0.0969658	2.6151	0.0477489	54.5632	5.55962	0.454348	0.00661354
020_VU120-O7A	10	4	0.0416069	1.47965	5.81252	0.732477	0.0620328	0.904949	4.63494	0.106767	36.7473	0.569102	5.35072	0.12092	2.63672	0.0595438	67.4317	4.44497	0.342595	0.00507199
021_VU120-O7A	12	4	0.0690889	0.786616	4.97581	0.770127	0.0544964	0.926294	3.60051	0.132354	39.7888	0.52539	5.43504	0.148313	2.67824	0.0730311	49.1362	3.45264	0.31086	0.00485837
023_VU120-O7A	15	4	0.150197	0.645604	3.44108	0.927351	0.0598399	0.866854	2.66757	0.183628	59.0722	0.353544	5.43979	0.27087	2.68058	0.13338	24.5436	2.55818	0.333053	0.00629729
024_VU120-O7A	21	4	0.288623	0.454823	2.41116	0.949719	0.0871423	0.585848	2.50092	0.141997	99.4546	0.21214	5.39011	0.363629	2.65612	0.179058	13.5454	2.39889	0.445718	0.00856038
241_VU120-O7B	10		0.203749	0.582145	0.159101	9.15652	0.0425704	1.31191	0.271846	0.481042	61.0458	0.27273	0.834932	2.91746	0.411687	1.43838	0.371661	0.260821	0.734422	0.134681
242_VU120-O7B	13		0.275848	0.520646	1.0335	1.92235	0.0745838	0.67419	1.34158	0.130697	87.5989	0.19191	3.96945	0.698794	1.95642	0.344231	6.07609	1.28702	0.557894	0.021499
244_VU120-O7B	16		0.120258	0.658623	2.77873	1.03091	0.0702952	1.04939	3.33645	0.128507	51.9318	0.330913	4.87149	0.177185	2.40073	0.0872615	31.2803	3.20061	0.516016	0.0107217
245_VU120-O7B	18	4	0.0415516	1.76208	2.5834	1.01315	0.049834	0.953321	3.30065	0.120769	29.4653	0.562859	5.23224	0.167017	2.57838	0.0822457	58.5796	3.16637	0.549095	0.0112052
247_VU120-O7B	20	4	0.0201634	2.62516	3.05598	0.821851	0.0578123	0.812292	4.24797	0.122199	28.3394	0.583765	5.31259	0.108592	2.61795	0.0534738	79.5954	4.07533	0.597433	0.00992809
248_VU120-O7B	22	4	0.0164322	3.13121	3.26363	0.898682	0.0580633	1.17799	4.69813	0.117354	29.6532	0.556361	5.32385	0.0968487	2.62349	0.047691	84.3093	4.50726	0.618713	0.011215
250_VU120-O7B	25	4	0.0198957	2.84038	4.35732	0.76493	0.078031	0.945384	6.29494	0.122919	39.2804	0.422363	5.35257	0.0763882	2.63763	0.0376154	85.7384	6.03921	0.620924	0.00962124
251_VU120-O7B	29	4	0.0297889	2.24832	6.1452	0.745788	0.0997723	0.66349	7.99947	0.108389	51.2871	0.324328	5.36199	0.0661415	2.64227	0.0325696	83.5899	7.6741	0.559459	0.00843253
253_VU120-O7B	10	4	0.026049	2.55145	6.79379	0.724271	0.0975895	0.584479	7.84015	0.10538	49.3649	0.339551	5.37502	0.067303	2.64869	0.0331414	85.3166	7.52077	0.495938	0.00725961
254_VU120-O7B	13	4	0.0756471	1.07128	11.9896	0.769177	0.123499	0.58908	9.12455	0.116187	69.7002	0.243524	5.27091	0.066205	2.59742	0.0326017	68.9412	8.75021	0.326957	0.00508692
256_VU120-O7B	21		0.0917809	0.90947	6.35056	0.730791	0.0748419	0.883064	4.80815	0.111139	51.6717	0.322969	5.15542	0.125952	2.54055	0.0620249	47.9295	4.61088	0.325273	0.0048089
		S	2.24988	0.179228	94.2188	0.196726	1.69412	0.16056	104.249	0.0286574	1214.57	0.0753109
Information on Analysis and Constants Used in Calculations									Results		40(a)/36(a)	± 2s	40(r)/39(k)	± 2s	Age	± 2s	MSWD	39Ar(k)	K/Ca	± 2s
															(Ma)			(%,n)
Sample = 008_VU120-O7A				Age Equations = Min et al. (2000)					Age Plateau				5.33765	0.026168	2.63029	0.0195626	1.41917	89.8211	0.43913	0.0600104
Material = groundmass				Negative Intensities = Allowed										0.00490253		0.00743742	0.12789	16
Location = CH18-04 - Christiana				Decay Constant 40K = 5.460 ± 0.053 E-10 1/a					Full External Error							0.0584322	1.7303	2σ Confidence Limit
Analyst = Klaudia Kuiper				Decay Constant 39Ar = 2.940 ± 0.016 E-07 1/h					Analytical Error							0.0128858	1.19129	Error Magnification
Project = VU120				Decay Constant 37Ar = 8.230 ± 0.012 E-04 1/h
Mass Discrimination Law = LIN				Decay Constant 36Cl = 2.257 ± 0.015 E-06 1/a					Total Fusion Age				5.2808	0.0294418	2.60229	0.020549		23	0.475488	0.00189058
Irradiation = VU120				Decay Activity 40K(EC,β⁺) = 3.310 ± 0.030 1/gs										0.00557526		0.00789651
J = 0.00026925 ± 0.00000075				Decay Activity 40K(β⁻) = 27.890 ± 0.150 1/gs					Full External Error							0.0582214
FCs = 28.201 ± 0.023 Ma				Atmospheric Ratio 40/36(a) = 298.56 ± 0.31					Analytical Error							0.0144981
IGSN = Undefined				Atmospheric Ratio 38/36(a) = 0.1885 ± 0.0003
Preferred Age = Undefined				Production Ratio 39/37(ca) = 0.000673 ± 0.000004					Normal Isochron		297.64	2.90386	5.34327	0.0347358	2.63305	0.0225761	1.50256	89.8211
Classification = Undefined				Production Ratio 36/37(ca) = 0.000264 ± 0.000002								0.00975629		0.00650085		0.0085741	0.100716	16
Experiment Type = Undefined				Production Ratio 40/39(k) = 0.000860 ± 0.000070					Full External Error							0.0595624	1.75593	2σ Confidence Limit
Extraction Method = Undefined				Production Ratio 38/39(k) = 0.012110 ± 0.000030					Analytical Error							0.0171048	1.22579	Error Magnification
Heating = 180 sec				Production Ratio 36/38(cl) = 262.80 ± 1.71												37		Number of Iterations
Isolation = 5.00 min				Scaling Ratio K/Ca = 0.430												5.05971e-05		Convergence
Instrument = HELIX				Abundance Ratio 40K/K = 1.1700 ± 0.0100 E-04
Lithology = Undefined				Atomic Weight K = 39.0983 ± 0.0001 g					Inverse Isochron		297.712	2.8875	5.34432	0.0344422	2.63357	0.0224686	1.49436	89.8211
Lat-Lon = Undefined - Undefined												0.00969897		0.00644463		0.00853161	0.103672	16
Feature = Undefined									Full External Error							0.0595318	1.75593	2σ Confidence Limit
									Analytical Error							0.0169602	1.22244	Error Magnification
																3		Number of Iterations
																0.000341315		Convergence
																0.721874		Spreading Factor

## Sheet: VU120-O8
Relative Abundances			36Ar [A]	%1s	37Ar [A]	%1s	38Ar [A]	%1s	39Ar [A]	%1s	40Ar [A]	%1s	40(r)/39(k)	± 2s	Age	± 2s	40Ar(r)	39Ar(k)	K/Ca	± 2s		Relative Abundances			36Ar [A]	%1s	37Ar [A]	%1s	38Ar [A]	%1s	39Ar [A]	%1s	40Ar [A]	%1s	40(r)/39(k)	± 2s	Age	± 2s	40Ar(r)	39Ar(k)	K/Ca	± 2s
															(Ma)		(%)	(%)																			(Ma)		(%)	(%)
026_VU120-O8A	5		0.000132598	1107.66	-0.00361473	314.768	3.66797e-05	1011.15	4.71762e-05	1760.64	-0.223524	49.1723	-5309.47	178732	0	199431	117.838	0.000126917	-0.00590135	0.201083		258_VU120-O8B	10		0.19866	0.744132	0.258563	6.33271	0.0483364	1.42141	0.671518	0.239276	60.3193	0.498159	1.53035	1.60125	0.763256	0.798447	1.70326	1.49614	1.11647	0.141507
027_VU120-O8A	7.5		0.0390381	3.94791	0.0230067	60.5201	0.00811837	4.54628	0.0278405	3.03399	11.3891	0.979596	-9.49826	34.0481	-4.74433	17.0289	-2.32054	0.0711861	0.520054	0.630266		259_VU120-O8B	15		0.306601	0.600819	3.23516	0.867381	0.117884	0.729658	3.8809	0.141823	106.54	0.282689	3.93289	0.327205	1.96087	0.163051	14.3182	8.64401	0.515539	0.00906226
029_VU120-O8A	10		0.179423	1.00336	0.432036	2.73797	0.0501544	1.25742	0.921299	0.204621	55.7597	0.209281	2.41564	1.20051	1.20464	0.598477	3.99002	2.35626	0.916668	0.0503363		261_VU120-O8B	18	4	0.0988564	1.13975	4.06967	0.784705	0.0748306	0.962238	4.52558	0.107965	52.6959	0.569205	5.1955	0.200071	2.58993	0.099664	44.5924	10.0795	0.477881	0.00757066
030_VU120-O8A	15		0.20419	0.981547	4.34831	1.07113	0.103121	0.721738	4.6043	0.132903	82.0794	0.141506	4.66294	0.26665	2.32463	0.132849	26.1405	11.7719	0.455026	0.0098227		262_VU120-O8B	21	4	0.0590832	1.81551	4.24379	0.82911	0.0690837	0.779746	4.68104	0.109064	42.4746	0.705361	5.37931	0.188016	2.6815	0.0936545	59.248	10.4257	0.474015	0.007928
032_VU120-O8A	18	4	0.0734427	2.08475	4.12523	0.793341	0.0694472	0.77851	4.36144	0.117589	43.9532	0.254847	5.12723	0.216548	2.55592	0.107874	50.8446	11.151	0.454332	0.00728766		264_VU120-O8B	25	4	0.03781	2.93112	4.70216	0.798393	0.0650083	0.807068	4.87591	0.114082	37.4841	0.796962	5.45112	0.183459	2.71727	0.0913825	70.862	10.8593	0.4456	0.00718765
033_VU120-O8A	21	4	0.041004	3.69275	4.36256	0.853212	0.0621316	0.889774	4.48861	0.121061	35.9335	0.30823	5.35735	0.208009	2.67056	0.103614	66.8773	11.4759	0.442135	0.00762036		265_VU120-O8B	30	4	0.0396207	2.80683	5.43548	0.702585	0.0682562	1.01403	5.01248	0.106462	38.6944	0.772668	5.44826	0.178852	2.71584	0.0890876	70.5254	11.1625	0.396247	0.0056316
035_VU120-O8A	25	4	0.0301593	4.97283	4.28376	0.88814	0.0534534	0.98225	3.95563	0.112009	30.2981	0.37648	5.47165	0.234171	2.72749	0.116642	71.384	10.1125	0.396773	0.0071037		267_VU120-O8B	10	4	0.0324757	3.11852	4.74549	0.841989	0.0561473	1.29071	4.20214	0.110559	31.8311	0.9407	5.35982	0.203099	2.67179	0.101168	70.7032	9.35765	0.380477	0.00646223
036_VU120-O8A	30	4	0.0509154	3.03347	5.40931	0.71455	0.0634457	0.789152	4.48764	0.112955	38.8929	0.28794	5.37781	0.212123	2.68075	0.105662	62.0013	11.4716	0.356445	0.00515731		268_VU120-O8B	12	4	0.0785935	1.54663	8.22702	0.830709	0.0939937	0.71741	6.29506	0.11227	57.8242	0.528285	5.56524	0.151565	2.77411	0.0754933	60.5329	14.0166	0.328733	0.00551137
038_VU120-O8A	10	4	0.0430747	3.52352	4.67862	0.781473	0.0549963	0.788751	3.73822	0.127725	33.169	0.335335	5.5352	0.250347	2.75915	0.124697	62.3303	9.55562	0.343281	0.00543661		270_VU120-O8B	15	4	0.0725956	1.54247	6.56842	0.765931	0.0774209	0.742202	5.13136	0.111403	48.8209	0.612601	5.39509	0.17562	2.68936	0.0874794	56.6566	11.4257	0.335634	0.00519564
039_VU120-O8A	12	4	0.0801021	2.05056	6.13221	0.731536	0.0712829	0.733124	4.53553	0.124243	47.7582	0.238403	5.36755	0.222871	2.67564	0.111017	50.9285	11.5929	0.317748	0.00471558		271_VU120-O8B	21	4	0.0830892	1.40618	6.49929	0.71598	0.0899797	0.703503	5.62813	0.123443	54.9276	0.545922	5.44628	0.1644	2.71485	0.081889	55.7617	12.5329	0.372074	0.00540669
041_VU120-O8A	15	4	0.0916634	1.83329	5.33133	0.879903	0.0711365	0.626706	4.30167	0.10637	49.6471	0.225218	5.28066	0.239817	2.63236	0.11946	45.7162	10.996	0.346664	0.0061451
042_VU120-O8A	21	4	0.098794	1.57282	4.21848	0.825367	0.0673203	0.991983	3.69462	0.156924	48.3191	0.232681	5.18797	0.259641	2.58618	0.129339	39.6382	9.44486	0.376312	0.00632335
																								S	1.00739	0.391897	47.985	0.272873	0.76094	0.278332	44.9041	0.0382307	531.613	0.178622
		S	0.93194	0.600341	43.3412	0.280622	0.674644	0.275545	39.1168	0.0406354	476.976	0.0818673
																						Information on Analysis and Constants Used in Calculations									Results		40(a)/36(a)	± 2s	40(r)/39(k)	± 2s	Age	± 2s	MSWD	39Ar(k)	K/Ca	± 2s
																																					(Ma)			(%,n)
Information on Analysis and Constants Used in Calculations									Results		40(a)/36(a)	± 2s	40(r)/39(k)	± 2s	Age	± 2s	MSWD	39Ar(k)	K/Ca	± 2s
															(Ma)			(%,n)				Sample = 258_VU120-O8B				Age Equations = Min et al. (2000)					Age Plateau				5.42031	0.0740291	2.70192	0.0387412	1.37797	89.8599	0.386567	0.0385343
																						Material = groundmass				Negative Intensities = Allowed										0.0136577		0.0143384	0.20955	8
Sample = 026_VU120-O8A				Age Equations = Min et al. (2000)					Age Plateau				5.33665	0.0935387	2.66025	0.0480396	1.34048	85.8005	0.366144	0.0321066		Location = CH18-05b - Christiana				Decay Constant 40K = 5.460 ± 0.053 E-10 1/a					Full External Error							0.0685549	2.06904	2σ Confidence Limit
Material = groundmass				Negative Intensities = Allowed										0.0175276		0.0180583	0.226291	8				Analyst = Klaudia Kuiper				Decay Constant 39Ar = 2.940 ± 0.016 E-07 1/h					Analytical Error							0.0368748	1.17387	Error Magnification
Location = CH19-05b - Christiana				Decay Constant 40K = 5.460 ± 0.053 E-10 1/a					Full External Error							0.0735448	2.06904	2σ Confidence Limit				Project = VU120				Decay Constant 37Ar = 8.230 ± 0.012 E-04 1/h
Analyst = Klaudia Kuiper				Decay Constant 39Ar = 2.940 ± 0.016 E-07 1/h					Analytical Error							0.0465939	1.15779	Error Magnification				Mass Discrimination Law = LIN				Decay Constant 36Cl = 2.257 ± 0.015 E-06 1/a					Total Fusion Age				5.2281	0.0678211	2.60617	0.0356748		10	0.402102	0.00221592
Project = VU120				Decay Constant 37Ar = 8.230 ± 0.012 E-04 1/h																		Irradiation = VU120				Decay Activity 40K(EC,β⁺) = 3.310 ± 0.030 1/gs										0.0129724		0.0136886
Mass Discrimination Law = LIN				Decay Constant 36Cl = 2.257 ± 0.015 E-06 1/a					Total Fusion Age				5.17096	0.0880347	2.57771	0.0452951		12	0.387799	0.00219923		J = 0.00027237 ± 0.00000060				Decay Activity 40K(β⁻) = 27.890 ± 0.150 1/gs					Full External Error							0.0651844
Irradiation = VU120				Decay Activity 40K(EC,β⁺) = 3.310 ± 0.030 1/gs										0.0170248		0.0175718						FCs = 28.201 ± 0.023 Ma				Atmospheric Ratio 40/36(a) = 298.56 ± 0.31					Analytical Error							0.0337843
J = 0.00027237 ± 0.00000060				Decay Activity 40K(β⁻) = 27.890 ± 0.150 1/gs					Full External Error							0.0704511						IGSN = Undefined				Atmospheric Ratio 38/36(a) = 0.1885 ± 0.0003
FCs = 28.201 ± 0.023 Ma				Atmospheric Ratio 40/36(a) = 298.56 ± 0.31					Analytical Error							0.0438542						Preferred Age = Undefined				Production Ratio 39/37(ca) = 0.000673 ± 0.000004					Normal Isochron		286.937	16.1135	5.55795	0.206302	2.77048	0.103477	1.20391	89.8599
IGSN = Undefined				Atmospheric Ratio 38/36(a) = 0.1885 ± 0.0003																		Classification = Undefined				Production Ratio 36/37(ca) = 0.000264 ± 0.000002								0.0561571		0.0371183		0.0373499	0.300674	8
Preferred Age = Undefined				Production Ratio 39/37(ca) = 0.000673 ± 0.000004					Normal Isochron		285.253	13.3082	5.5237	0.208584	2.75342	0.104598	0.950871	85.8005				Experiment Type = Undefined				Production Ratio 40/39(k) = 0.000860 ± 0.000070					Full External Error							0.11862	2.1547	2σ Confidence Limit
Classification = Undefined				Production Ratio 36/37(ca) = 0.000264 ± 0.000002								0.0466539		0.0377616		0.0379885	0.457007	8				Extraction Method = Undefined				Production Ratio 38/39(k) = 0.012110 ± 0.000030					Analytical Error							0.102758	1.09723	Error Magnification
Experiment Type = Undefined				Production Ratio 40/39(k) = 0.000860 ± 0.000070					Full External Error							0.119427	2.1547	2σ Confidence Limit				Heating = 180 sec				Production Ratio 36/38(cl) = 262.80 ± 1.71												24		Number of Iterations
Extraction Method = Undefined				Production Ratio 38/39(k) = 0.012110 ± 0.000030					Analytical Error							0.103895	1	Error Magnification				Isolation = 5.00 min				Scaling Ratio K/Ca = 0.430												4.49158e-05		Convergence
Heating = 180 sec				Production Ratio 36/38(cl) = 262.80 ± 1.71												30		Number of Iterations				Instrument = HELIX				Abundance Ratio 40K/K = 1.1700 ± 0.0100 E-04
Isolation = 5.00 min				Scaling Ratio K/Ca = 0.430												4.86707e-05		Convergence				Lithology = Undefined				Atomic Weight K = 39.0983 ± 0.0001 g					Inverse Isochron		286.917	16.4494	5.56248	0.210091	2.77273	0.105353	1.22243	89.8599
Instrument = HELIX				Abundance Ratio 40K/K = 1.1700 ± 0.0100 E-04																		Lat-Lon = Undefined - Undefined												0.0573318		0.0377693		0.037996	0.291011	8
Lithology = Undefined				Atomic Weight K = 39.0983 ± 0.0001 g					Inverse Isochron		285.128	13.2677	5.53177	0.206709	2.75744	0.103672	0.939622	85.8005				Feature = Undefined									Full External Error							0.120282	2.1547	2σ Confidence Limit
Lat-Lon = Undefined - Undefined												0.0465325		0.0373675		0.0375974	0.464968	8													Analytical Error							0.104645	1.10563	Error Magnification
Feature = Undefined									Full External Error							0.118658	2.1547	2σ Confidence Limit																				5		Number of Iterations
									Analytical Error							0.102961	1	Error Magnification																				7.86237e-05		Convergence
																3		Number of Iterations																				0.25639		Spreading Factor
																0.00015912		Convergence
																0.299089		Spreading Factor
Relative Abundances			36Ar [A]	%1s	37Ar [A]	%1s	38Ar [A]	%1s	39Ar [A]	%1s	40Ar [A]	%1s	40(r)/39(k)	± 2s	Age	± 2s	40Ar(r)	39Ar(k)	K/Ca	± 2s
															(Ma)		(%)	(%)
026_VU120-O8A	5		0.000132598	1107.66	-0.00361473	314.768	3.66797e-05	1011.15	4.71762e-05	1760.64	-0.223524	49.1723	-5309.47	178732	0	199431	117.838	5.90867e-05	-0.00590135	0.201083
027_VU120-O8A	7.5		0.0390381	3.94791	0.0230067	60.5201	0.00811837	4.54628	0.0278405	3.03399	11.3891	0.979596	-9.49826	34.0481	-4.74433	17.0289	-2.32054	0.033141	0.520054	0.630266
029_VU120-O8A	10		0.179423	1.00336	0.432036	2.73797	0.0501544	1.25742	0.921299	0.204621	55.7597	0.209281	2.41564	1.20051	1.20464	0.598477	3.99002	1.09697	0.916668	0.0503363
030_VU120-O8A	15		0.20419	0.981547	4.34831	1.07113	0.103121	0.721738	4.6043	0.132903	82.0794	0.141506	4.66294	0.26665	2.32463	0.132849	26.1405	5.48047	0.455026	0.0098227
032_VU120-O8A	18	4	0.0734427	2.08475	4.12523	0.793341	0.0694472	0.77851	4.36144	0.117589	43.9532	0.254847	5.12723	0.216548	2.55592	0.107874	50.8446	5.19138	0.454332	0.00728766
033_VU120-O8A	21	4	0.041004	3.69275	4.36256	0.853212	0.0621316	0.889774	4.48861	0.121061	35.9335	0.30823	5.35735	0.208009	2.67056	0.103614	66.8773	5.34266	0.442135	0.00762036
035_VU120-O8A	25	4	0.0301593	4.97283	4.28376	0.88814	0.0534534	0.98225	3.95563	0.112009	30.2981	0.37648	5.47165	0.234171	2.72749	0.116642	71.384	4.70792	0.396773	0.0071037
036_VU120-O8A	30	4	0.0509154	3.03347	5.40931	0.71455	0.0634457	0.789152	4.48764	0.112955	38.8929	0.28794	5.37781	0.212123	2.68075	0.105662	62.0013	5.34067	0.356445	0.00515731
038_VU120-O8A	10	4	0.0430747	3.52352	4.67862	0.781473	0.0549963	0.788751	3.73822	0.127725	33.169	0.335335	5.5352	0.250347	2.75915	0.124697	62.3303	4.44866	0.343281	0.00543661
039_VU120-O8A	12	4	0.0801021	2.05056	6.13221	0.731536	0.0712829	0.733124	4.53553	0.124243	47.7582	0.238403	5.36755	0.222871	2.67564	0.111017	50.9285	5.39713	0.317748	0.00471558
041_VU120-O8A	15	4	0.0916634	1.83329	5.33133	0.879903	0.0711365	0.626706	4.30167	0.10637	49.6471	0.225218	5.28066	0.239817	2.63236	0.11946	45.7162	5.11924	0.346664	0.0061451
042_VU120-O8A	21	4	0.098794	1.57282	4.21848	0.825367	0.0673203	0.991983	3.69462	0.156924	48.3191	0.232681	5.18797	0.259641	2.58618	0.129339	39.6382	4.39709	0.376312	0.00632335
258_VU120-O8B	10		0.19866	0.744132	0.258563	6.33271	0.0483364	1.42141	0.671518	0.239276	60.3193	0.498159	1.53035	1.60125	0.763256	0.798447	1.70326	0.799605	1.11647	0.141507
259_VU120-O8B	15		0.306601	0.600819	3.23516	0.867381	0.117884	0.729658	3.8809	0.141823	106.54	0.282689	3.93289	0.327205	1.96087	0.163051	14.3182	4.61976	0.515539	0.00906226
261_VU120-O8B	18	4	0.0988564	1.13975	4.06967	0.784705	0.0748306	0.962238	4.52558	0.107965	52.6959	0.569205	5.1955	0.200071	2.58993	0.099664	44.5924	5.38693	0.477881	0.00757066
262_VU120-O8B	21	4	0.0590832	1.81551	4.24379	0.82911	0.0690837	0.779746	4.68104	0.109064	42.4746	0.705361	5.37931	0.188016	2.6815	0.0936545	59.248	5.57195	0.474015	0.007928
264_VU120-O8B	25	4	0.03781	2.93112	4.70216	0.798393	0.0650083	0.807068	4.87591	0.114082	37.4841	0.796962	5.45112	0.183459	2.71727	0.0913825	70.862	5.80369	0.4456	0.00718765
265_VU120-O8B	30	4	0.0396207	2.80683	5.43548	0.702585	0.0682562	1.01403	5.01248	0.106462	38.6944	0.772668	5.44826	0.178852	2.71584	0.0890876	70.5254	5.96576	0.396247	0.0056316
267_VU120-O8B	10	4	0.0324757	3.11852	4.74549	0.841989	0.0561473	1.29071	4.20214	0.110559	31.8311	0.9407	5.35982	0.203099	2.67179	0.101168	70.7032	5.00116	0.380477	0.00646223
268_VU120-O8B	12	4	0.0785935	1.54663	8.22702	0.830709	0.0939937	0.71741	6.29506	0.11227	57.8242	0.528285	5.56524	0.151565	2.77411	0.0754933	60.5329	7.49114	0.328733	0.00551137
270_VU120-O8B	15	4	0.0725956	1.54247	6.56842	0.765931	0.0774209	0.742202	5.13136	0.111403	48.8209	0.612601	5.39509	0.17562	2.68936	0.0874794	56.6566	6.10644	0.335634	0.00519564
271_VU120-O8B	21	4	0.0830892	1.40618	6.49929	0.71598	0.0899797	0.703503	5.62813	0.123443	54.9276	0.545922	5.44628	0.1644	2.71485	0.081889	55.7617	6.69818	0.372074	0.00540669
		S	1.93932	0.353086	91.3263	0.195684	1.43558	0.196299	84.021	0.0278454	1008.59	0.101799
Information on Analysis and Constants Used in Calculations									Results		40(a)/36(a)	± 2s	40(r)/39(k)	± 2s	Age	± 2s	MSWD	39Ar(k)	K/Ca	± 2s
															(Ma)			(%,n)
Sample = 026_VU120-O8A				Age Equations = Min et al. (2000)					Age Plateau				5.38863	0.0597841	2.68614	0.032036	1.44627	87.97	0.376089	0.0247392
Material = groundmass				Negative Intensities = Allowed										0.0110945		0.0119264	0.116082	16
Location = CH19-05b - Christiana				Decay Constant 40K = 5.460 ± 0.053 E-10 1/a					Full External Error							0.0647145	1.7303	2σ Confidence Limit
Analyst = Klaudia Kuiper				Decay Constant 39Ar = 2.940 ± 0.016 E-07 1/h					Analytical Error							0.0297795	1.20261	Error Magnification
Project = VU120				Decay Constant 37Ar = 8.230 ± 0.012 E-04 1/h
Mass Discrimination Law = LIN				Decay Constant 36Cl = 2.257 ± 0.015 E-06 1/a					Total Fusion Age				5.2015	0.0547137	2.59292	0.0295436		22	0.395314	0.00156274
Irradiation = VU120				Decay Activity 40K(EC,β⁺) = 3.310 ± 0.030 1/gs										0.0105188		0.0113939
J = 0.00027237 ± 0.00000060				Decay Activity 40K(β⁻) = 27.890 ± 0.150 1/gs					Full External Error							0.0617979
FCs = 28.201 ± 0.023 Ma				Atmospheric Ratio 40/36(a) = 298.56 ± 0.31					Analytical Error							0.0272552
IGSN = Undefined				Atmospheric Ratio 38/36(a) = 0.1885 ± 0.0003
Preferred Age = Undefined				Production Ratio 39/37(ca) = 0.000673 ± 0.000004					Normal Isochron		284.82	9.60282	5.56242	0.134244	2.7727	0.0679683	1.0141	87.97
Classification = Undefined				Production Ratio 36/37(ca) = 0.000264 ± 0.000002								0.0337154		0.0241341		0.0245134	0.43511	16
Experiment Type = Undefined				Production Ratio 40/39(k) = 0.000860 ± 0.000070					Full External Error							0.0893772	1.75593	2σ Confidence Limit
Extraction Method = Undefined				Production Ratio 38/39(k) = 0.012110 ± 0.000030					Analytical Error							0.0668661	1.00703	Error Magnification
Heating = 180 sec				Production Ratio 36/38(cl) = 262.80 ± 1.71												23		Number of Iterations
Isolation = 5.00 min				Scaling Ratio K/Ca = 0.430												5.47796e-05		Convergence
Instrument = HELIX				Abundance Ratio 40K/K = 1.1700 ± 0.0100 E-04
Lithology = Undefined				Atomic Weight K = 39.0983 ± 0.0001 g					Inverse Isochron		284.756	9.65344	5.56876	0.134441	2.77586	0.0680669	1.01075	87.97
Lat-Lon = Undefined - Undefined												0.0339007		0.0241419		0.024521	0.43856	16
Feature = Undefined									Full External Error							0.0894952	1.75593	2σ Confidence Limit
									Analytical Error							0.0669638	1.00536	Error Magnification
																3		Number of Iterations
																0.000103197		Convergence
																0.30917		Spreading Factor

## Sheet: VU120-O9
Relative Abundances			36Ar [A]	%1s	37Ar [A]	%1s	38Ar [A]	%1s	39Ar [A]	%1s	40Ar [A]	%1s	40(r)/39(k)	± 2s	Age	± 2s	40Ar(r)	39Ar(k)	K/Ca	± 2s		Relative Abundances			36Ar [A]	%1s	37Ar [A]	%1s	38Ar [A]	%1s	39Ar [A]	%1s	40Ar [A]	%1s	40(r)/39(k)	± 2s	Age	± 2s	40Ar(r)	39Ar(k)	K/Ca	± 2s
															(Ma)		(%)	(%)																			(Ma)		(%)	(%)
050_VU120-O9A	5		0.00365982	19.2467	0.00610622	201.725	0.00105889	33.194	0.000136711	263.907	0.727186	39.1238	-2752.42	15903.8	-2538.56	31755	-50.1902	0.000280577	0.00933781	0.0632668		279_VU120-O9B	10		0.635923	0.431357	0.696178	2.02135	0.141596	0.646247	1.41524	0.202284	192.822	0.167256	2.13139	1.27523	1.06293	0.635777	1.56384	1.87154	0.873843	0.0355035
051_VU120-O9A	7.5		0.140725	0.755123	0.0431886	23.2747	0.0280693	1.48593	0.0649463	0.997152	41.9443	0.680599	-1.03357	13.2175	-0.515667	6.5954	-0.159966	0.137361	0.646337	0.301142		280_VU120-O9B	12		0.804421	0.514158	2.52581	1.31774	0.207843	0.455252	3.94365	0.131322	259.914	0.131672	5.059	0.66248	2.52194	0.330022	7.67268	5.21464	0.671088	0.0177741
053_VU120-O9A	10		0.727307	0.420973	0.802779	1.84686	0.162875	0.53795	1.52039	0.115962	219.071	0.134282	1.30837	1.29812	0.65256	0.647334	0.907707	3.21591	0.814092	0.0301295		282_VU120-O9B	14		0.767639	0.44827	5.77019	0.794294	0.239909	0.425425	7.85058	0.10845	268.164	0.123138	5.02448	0.281872	2.50474	0.140419	14.702	10.3801	0.584743	0.00937543
054_VU120-O9A	15	4	0.951302	0.440777	9.36361	0.618133	0.32956	0.310449	12.1636	0.106517	347.933	0.0913372	5.31702	0.218237	2.65047	0.108709	18.5785	25.7241	0.558294	0.00700382		283_VU120-O9B	16		0.432723	0.49327	6.21282	0.852148	0.172506	0.417345	7.64008	0.111762	169.788	0.191872	5.37949	0.191095	2.68158	0.0951879	24.1932	10.1012	0.528494	0.00908431
056_VU120-O9A	18	4	0.317631	0.601402	7.42089	0.724875	0.158303	0.485343	8.18374	0.108882	139.959	0.206464	5.58822	0.158644	2.78555	0.0790192	32.6558	17.3057	0.473914	0.00694774		285_VU120-O9B	18		0.36452	0.50342	8.95773	0.769056	0.184687	0.422547	9.88863	0.104552	165.578	0.193605	5.81264	0.131036	2.89733	0.0652636	34.6931	13.0733	0.474397	0.00736396
057_VU120-O9A	21	4	0.26378	0.54146	8.26929	0.706078	0.13993	0.46652	7.67787	0.106842	120.229	0.238995	5.48989	0.136219	2.73658	0.067851	35.0332	16.2341	0.398957	0.00569812		286_VU120-O9B	20	4	0.249788	0.622634	8.3951	0.812093	0.152034	0.421742	8.82596	0.11305	123.268	0.257356	5.59452	0.129331	2.7887	0.0644186	40.031	11.668	0.451779	0.00740858
059_VU120-O9A	25	4	0.274754	0.634756	7.22464	0.656778	0.120737	0.536144	5.69411	0.118776	112.931	0.254846	5.53059	0.211671	2.75685	0.105433	27.8621	12.0381	0.338616	0.00452019		288_VU120-O9B	24	4	0.218136	0.725379	9.60666	0.716479	0.145564	0.623671	9.11565	0.119586	116.262	0.272073	5.69588	0.126437	2.83918	0.0629751	44.6274	12.0502	0.407733	0.00592358
060_VU120-O9A	30	4	0.367315	0.56063	7.36728	0.734001	0.127099	0.45181	4.52112	0.121186	134.742	0.214688	5.68042	0.305393	2.83148	0.15211	19.0391	9.55591	0.263591	0.00392202		289_VU120-O9B	29	4	0.316572	0.560838	14.7065	0.663046	0.190448	0.349657	11.4109	0.105129	154.932	0.206015	5.40002	0.110475	2.69181	0.0550293	39.7372	15.0819	0.333351	0.00447586
062_VU120-O9A	10	4	0.159999	0.663266	5.60969	0.694294	0.0695671	0.708576	3.35235	0.112863	65.9607	0.434384	5.56373	0.257149	2.77336	0.128084	28.2449	7.08538	0.256679	0.0036111		291_VU120-O9B	10	4	0.320244	0.50695	15.8872	0.622053	0.17413	0.415791	9.3348	0.105873	144.618	0.220024	5.38928	0.126677	2.68646	0.0631	34.7469	12.3345	0.252364	0.00318494
063_VU120-O9A	12	4	0.167783	0.788317	5.44197	0.826417	0.0591596	1.21151	2.16719	0.151259	61.2249	0.466789	5.34253	0.453447	2.66318	0.225873	18.8791	4.57789	0.170952	0.00287266		292_VU120-O9B	21	4	0.583376	0.431399	20.497	0.629977	0.188007	0.401932	6.23123	0.109146	206.274	0.156031	5.42207	0.269505	2.7028	0.134244	16.343	8.22478	0.130434	0.001668
065_VU120-O9A	15	4	0.0936861	1.02902	2.48251	1.15181	0.026394	1.43474	0.712922	0.211477	31.8467	0.895388	5.72349	1.14246	2.85293	0.569028	12.7826	1.50496	0.123197	0.00288566
066_VU120-O9A	21		0.170563	0.697088	3.98412	0.777512	0.0481333	1.0764	1.24102	0.133758	58.8937	0.485452	6.68922	0.741264	3.33387	0.369106	14.0653	2.62026	0.133652	0.002109
																								S	4.69334	0.16701	93.2552	0.254414	1.79672	0.143802	75.6567	0.0372335	1801.62	0.0567808
		S	3.6385	0.187962	58.0161	0.247498	1.27089	0.176749	47.2994	0.0435372	1335.46	0.0752302
																						Information on Analysis and Constants Used in Calculations									Results		40(a)/36(a)	± 2s	40(r)/39(k)	± 2s	Age	± 2s	MSWD	39Ar(k)	K/Ca	± 2s
																																					(Ma)			(%,n)
Information on Analysis and Constants Used in Calculations									Results		40(a)/36(a)	± 2s	40(r)/39(k)	± 2s	Age	± 2s	MSWD	39Ar(k)	K/Ca	± 2s
															(Ma)			(%,n)				Sample = 279_VU120-O9B				Age Equations = Min et al. (2000)					Age Plateau Error Mean				5.50621	0.127954	2.74471	0.0648664	4.59009	59.3593	0.195172	0.0974693
																						Material = groundmass				Negative Intensities = Allowed										0.0232381		0.0236333	0.0010492	5
Sample = 050_VU120-O9A				Age Equations = Min et al. (2000)					Age Plateau				5.5125	0.0770565	2.74784	0.0402384	0.903771	94.0262	0.242928	0.0873186		Location = CH18-08 - Christiana				Decay Constant 40K = 5.460 ± 0.053 E-10 1/a					Full External Error							0.0866522	2.41421	2σ Confidence Limit
Material = groundmass				Negative Intensities = Allowed										0.0139785		0.0146437	0.502196	8				Analyst = Klaudia Kuiper				Decay Constant 39Ar = 2.940 ± 0.016 E-07 1/h					Analytical Error							0.063734	2.14245	Error Magnification
Location = CH18-08 - Christiana				Decay Constant 40K = 5.460 ± 0.053 E-10 1/a					Full External Error							0.070197	2.06904	2σ Confidence Limit				Project = VU120				Decay Constant 37Ar = 8.230 ± 0.012 E-04 1/h
Analyst = Klaudia Kuiper				Decay Constant 39Ar = 2.940 ± 0.016 E-07 1/h					Analytical Error							0.0383819	1	Error Magnification				Mass Discrimination Law = LIN				Decay Constant 36Cl = 2.257 ± 0.015 E-06 1/a					Total Fusion Age				5.39279	0.0689761	2.68821	0.0363343		10	0.348564	0.00179251
Project = VU120				Decay Constant 37Ar = 8.230 ± 0.012 E-04 1/h																		Irradiation = VU120				Decay Activity 40K(EC,β⁺) = 3.310 ± 0.030 1/gs										0.0127904		0.0135162
Mass Discrimination Law = LIN				Decay Constant 36Cl = 2.257 ± 0.015 E-06 1/a					Total Fusion Age				5.3678	0.0981174	2.67576	0.0502703		12	0.350282	0.00176055		J = 0.00027237 ± 0.00000060				Decay Activity 40K(β⁻) = 27.890 ± 0.150 1/gs					Full External Error							0.066983
Irradiation = VU120				Decay Activity 40K(EC,β⁺) = 3.310 ± 0.030 1/gs										0.0182789		0.0187873						FCs = 28.201 ± 0.023 Ma				Atmospheric Ratio 40/36(a) = 298.56 ± 0.31					Analytical Error							0.0343581
J = 0.00027237 ± 0.00000060				Decay Activity 40K(β⁻) = 27.890 ± 0.150 1/gs					Full External Error							0.0752622						IGSN = Undefined				Atmospheric Ratio 38/36(a) = 0.1885 ± 0.0003
FCs = 28.201 ± 0.023 Ma				Atmospheric Ratio 40/36(a) = 298.56 ± 0.31					Analytical Error							0.0488742						Preferred Age = Undefined				Production Ratio 39/37(ca) = 0.000673 ± 0.000004					Normal Isochron Error Chron		296.024	9.588	5.58152	0.33286	2.78222	0.166245	5.64134	59.3593
IGSN = Undefined				Atmospheric Ratio 38/36(a) = 0.1885 ± 0.0003																		Classification = Undefined				Production Ratio 36/37(ca) = 0.000264 ± 0.000002								0.0323893		0.0596361		0.0597528	0.000732635	5
Preferred Age = Undefined				Production Ratio 39/37(ca) = 0.000673 ± 0.000004					Normal Isochron		296.919	4.22398	5.59026	0.218142	2.78657	0.109343	0.998853	94.0262				Experiment Type = Undefined				Production Ratio 40/39(k) = 0.000860 ± 0.000070					Full External Error							0.176151	2.63299	2σ Confidence Limit
Classification = Undefined				Production Ratio 36/37(ca) = 0.000264 ± 0.000002								0.014226		0.0390218		0.0392393	0.423961	8				Extraction Method = Undefined				Production Ratio 38/39(k) = 0.012110 ± 0.000030					Analytical Error							0.165795	2.37515	Error Magnification
Experiment Type = Undefined				Production Ratio 40/39(k) = 0.000860 ± 0.000070					Full External Error							0.123928	2.1547	2σ Confidence Limit				Heating = 180 sec				Production Ratio 36/38(cl) = 262.80 ± 1.71												8		Number of Iterations
Extraction Method = Undefined				Production Ratio 38/39(k) = 0.012110 ± 0.000030					Analytical Error							0.108654	1	Error Magnification				Isolation = 5.00 min				Scaling Ratio K/Ca = 0.430												3.17147e-05		Convergence
Heating = 180 sec				Production Ratio 36/38(cl) = 262.80 ± 1.71												7		Number of Iterations				Instrument = HELIX				Abundance Ratio 40K/K = 1.1700 ± 0.0100 E-04
Isolation = 5.00 min				Scaling Ratio K/Ca = 0.430												2.99541e-05		Convergence				Lithology = Undefined				Atomic Weight K = 39.0983 ± 0.0001 g					Inverse Isochron Error Chron		295.927	9.60043	5.58935	0.332295	2.78612	0.165966	5.6973	59.3593
Instrument = HELIX				Abundance Ratio 40K/K = 1.1700 ± 0.0100 E-04																		Lat-Lon = Undefined - Undefined												0.0324419		0.0594515		0.0595687	0.000676639	5
Lithology = Undefined				Atomic Weight K = 39.0983 ± 0.0001 g					Inverse Isochron		296.989	4.23155	5.58808	0.218106	2.78548	0.109324	1.00231	94.0262				Feature = Undefined									Full External Error							0.175914	2.63299	2σ Confidence Limit
Lat-Lon = Undefined - Undefined												0.0142482		0.0390305		0.0392479	0.421641	8													Analytical Error							0.165513	2.3869	Error Magnification
Feature = Undefined									Full External Error							0.123901	2.1547	2σ Confidence Limit																				4		Number of Iterations
									Analytical Error							0.108636	1.00115	Error Magnification																				6.1364e-05		Convergence
																4		Number of Iterations																				0.269484		Spreading Factor
																6.45453e-05		Convergence
																0.23181		Spreading Factor
Relative Abundances			36Ar [A]	%1s	37Ar [A]	%1s	38Ar [A]	%1s	39Ar [A]	%1s	40Ar [A]	%1s	40(r)/39(k)	± 2s	Age	± 2s	40Ar(r)	39Ar(k)	K/Ca	± 2s
															(Ma)		(%)	(%)
050_VU120-O9A	5		0.00365982	19.2467	0.00610622	201.725	0.00105889	33.194	0.000136711	263.907	0.727186	39.1238	-2752.42	15903.8	-2538.56	31755	-50.1902	0.000107934	0.00933781	0.0632668
051_VU120-O9A	7.5		0.140725	0.755123	0.0431886	23.2747	0.0280693	1.48593	0.0649463	0.997152	41.9443	0.680599	-1.03357	13.2175	-0.515667	6.5954	-0.159966	0.0528408	0.646337	0.301142
053_VU120-O9A	10		0.727307	0.420973	0.802779	1.84686	0.162875	0.53795	1.52039	0.115962	219.071	0.134282	1.30837	1.29812	0.65256	0.647334	0.907707	1.23712	0.814092	0.0301295
054_VU120-O9A	15	4	0.951302	0.440777	9.36361	0.618133	0.32956	0.310449	12.1636	0.106517	347.933	0.0913372	5.31702	0.218237	2.65047	0.108709	18.5785	9.89572	0.558294	0.00700382
056_VU120-O9A	18	4	0.317631	0.601402	7.42089	0.724875	0.158303	0.485343	8.18374	0.108882	139.959	0.206464	5.58822	0.158644	2.78555	0.0790192	32.6558	6.65728	0.473914	0.00694774
057_VU120-O9A	21	4	0.26378	0.54146	8.26929	0.706078	0.13993	0.46652	7.67787	0.106842	120.229	0.238995	5.48989	0.136219	2.73658	0.067851	35.0332	6.24504	0.398957	0.00569812
059_VU120-O9A	25	4	0.274754	0.634756	7.22464	0.656778	0.120737	0.536144	5.69411	0.118776	112.931	0.254846	5.53059	0.211671	2.75685	0.105433	27.8621	4.63089	0.338616	0.00452019
060_VU120-O9A	30	4	0.367315	0.56063	7.36728	0.734001	0.127099	0.45181	4.52112	0.121186	134.742	0.214688	5.68042	0.305393	2.83148	0.15211	19.0391	3.67603	0.263591	0.00392202
062_VU120-O9A	10	4	0.159999	0.663266	5.60969	0.694294	0.0695671	0.708576	3.35235	0.112863	65.9607	0.434384	5.56373	0.257149	2.77336	0.128084	28.2449	2.72565	0.256679	0.0036111
063_VU120-O9A	12	4	0.167783	0.788317	5.44197	0.826417	0.0591596	1.21151	2.16719	0.151259	61.2249	0.466789	5.34253	0.453447	2.66318	0.225873	18.8791	1.76105	0.170952	0.00287266
065_VU120-O9A	15	4	0.0936861	1.02902	2.48251	1.15181	0.026394	1.43474	0.712922	0.211477	31.8467	0.895388	5.72349	1.14246	2.85293	0.569028	12.7826	0.578939	0.123197	0.00288566
066_VU120-O9A	21		0.170563	0.697088	3.98412	0.777512	0.0481333	1.0764	1.24102	0.133758	58.8937	0.485452	6.68922	0.741264	3.33387	0.369106	14.0653	1.00798	0.133652	0.002109
279_VU120-O9B	10		0.635923	0.431357	0.696178	2.02135	0.141596	0.646247	1.41524	0.202284	192.822	0.167256	2.13139	1.27523	1.06293	0.635777	1.56384	1.15158	0.873843	0.0355035
280_VU120-O9B	12		0.804421	0.514158	2.52581	1.31774	0.207843	0.455252	3.94365	0.131322	259.914	0.131672	5.059	0.66248	2.52194	0.330022	7.67268	3.20864	0.671088	0.0177741
282_VU120-O9B	14		0.767639	0.44827	5.77019	0.794294	0.239909	0.425425	7.85058	0.10845	268.164	0.123138	5.02448	0.281872	2.50474	0.140419	14.702	6.38699	0.584743	0.00937543
283_VU120-O9B	16		0.432723	0.49327	6.21282	0.852148	0.172506	0.417345	7.64008	0.111762	169.788	0.191872	5.37949	0.191095	2.68158	0.0951879	24.1932	6.21541	0.528494	0.00908431
285_VU120-O9B	18		0.36452	0.50342	8.95773	0.769056	0.184687	0.422547	9.88863	0.104552	165.578	0.193605	5.81264	0.131036	2.89733	0.0652636	34.6931	8.04416	0.474397	0.00736396
286_VU120-O9B	20	4	0.249788	0.622634	8.3951	0.812093	0.152034	0.421742	8.82596	0.11305	123.268	0.257356	5.59452	0.129331	2.7887	0.0644186	40.031	7.17949	0.451779	0.00740858
288_VU120-O9B	24	4	0.218136	0.725379	9.60666	0.716479	0.145564	0.623671	9.11565	0.119586	116.262	0.272073	5.69588	0.126437	2.83918	0.0629751	44.6274	7.41462	0.407733	0.00592358
289_VU120-O9B	29	4	0.316572	0.560838	14.7065	0.663046	0.190448	0.349657	11.4109	0.105129	154.932	0.206015	5.40002	0.110475	2.69181	0.0550293	39.7372	9.28009	0.333351	0.00447586
291_VU120-O9B	10	4	0.320244	0.50695	15.8872	0.622053	0.17413	0.415791	9.3348	0.105873	144.618	0.220024	5.38928	0.126677	2.68646	0.0631	34.7469	7.58956	0.252364	0.00318494
292_VU120-O9B	21	4	0.583376	0.431399	20.497	0.629977	0.188007	0.401932	6.23123	0.109146	206.274	0.156031	5.42207	0.269505	2.7028	0.134244	16.343	5.06082	0.130434	0.001668
		S	8.33185	0.124852	151.271	0.183327	3.06761	0.111606	122.956	0.0283793	3137.08	0.0457055
Information on Analysis and Constants Used in Calculations									Results		40(a)/36(a)	± 2s	40(r)/39(k)	± 2s	Age	± 2s	MSWD	39Ar(k)	K/Ca	± 2s
															(Ma)			(%,n)
Sample = 050_VU120-O9A				Age Equations = Min et al. (2000)					Age Plateau Error Mean				5.50857	0.0677289	2.74588	0.035831	2.05862	72.6952	0.217903	0.0629767
Material = groundmass				Negative Intensities = Allowed										0.0122952		0.013049	0.0162927	13
Location = CH18-08 - Christiana				Decay Constant 40K = 5.460 ± 0.053 E-10 1/a					Full External Error							0.0677321	1.8165	2σ Confidence Limit
Analyst = Klaudia Kuiper				Decay Constant 39Ar = 2.940 ± 0.016 E-07 1/h					Analytical Error							0.0337358	1.43479	Error Magnification
Project = VU120				Decay Constant 37Ar = 8.230 ± 0.012 E-04 1/h
Mass Discrimination Law = LIN				Decay Constant 36Cl = 2.257 ± 0.015 E-06 1/a					Total Fusion Age				5.38317	0.0567975	2.68342	0.0306534		22	0.349223	0.00129572
Irradiation = VU120				Decay Activity 40K(EC,β⁺) = 3.310 ± 0.030 1/gs										0.0105509		0.0114232
J = 0.00027237 ± 0.00000060				Decay Activity 40K(β⁻) = 27.890 ± 0.150 1/gs					Full External Error							0.0639914
FCs = 28.201 ± 0.023 Ma				Atmospheric Ratio 40/36(a) = 298.56 ± 0.31					Analytical Error							0.0282918
IGSN = Undefined				Atmospheric Ratio 38/36(a) = 0.1885 ± 0.0003
Preferred Age = Undefined				Production Ratio 39/37(ca) = 0.000673 ± 0.000004					Normal Isochron Error Chron		297.01	3.81229	5.56366	0.159706	2.77332	0.0804776	2.15444	72.6952
Classification = Undefined				Production Ratio 36/37(ca) = 0.000264 ± 0.000002								0.0128356		0.0287052		0.0290185	0.0140641	13
Experiment Type = Undefined				Production Ratio 40/39(k) = 0.000860 ± 0.000070					Full External Error							0.0992308	1.8528	2σ Confidence Limit
Extraction Method = Undefined				Production Ratio 38/39(k) = 0.012110 ± 0.000030					Analytical Error							0.0795485	1.4678	Error Magnification
Heating = 180 sec				Production Ratio 36/38(cl) = 262.80 ± 1.71												7		Number of Iterations
Isolation = 5.00 min				Scaling Ratio K/Ca = 0.430												3.89046e-05		Convergence
Instrument = HELIX				Abundance Ratio 40K/K = 1.1700 ± 0.0100 E-04
Lithology = Undefined				Atomic Weight K = 39.0983 ± 0.0001 g					Inverse Isochron Error Chron		296.951	3.81719	5.5695	0.159562	2.77623	0.0804084	2.16654	72.6952
Lat-Lon = Undefined - Undefined												0.0128546		0.0286492		0.0289632	0.0134606	13
Feature = Undefined									Full External Error							0.0992103	1.8528	2σ Confidence Limit
									Analytical Error							0.0794766	1.47192	Error Magnification
																3		Number of Iterations
																4.84679e-05		Convergence
																0.312014		Spreading Factor

[truncated: 1 more sheets: VU120-O10]
